# Supplementary material
Source: publisher figshare collection journal article supplement (https://acs.figshare.com/ndownloader/files/3997669)
Supplement: Supplementary file 1 [file 3997669]

 
data_CC11 

_audit_creation_method            SHELXL-97 
_chemical_name_systematic 
; 
 ? 
; 
_chemical_name_common             ? 
_chemical_melting_point           ? 
_chemical_formula_moiety          ? 
_chemical_formula_sum 
 'C112.75 H139 N20 O10.75' 
_chemical_formula_weight          1946.44 
 
loop_ 
 _atom_type_symbol 
 _atom_type_description 
 _atom_type_scat_dispersion_real 
 _atom_type_scat_dispersion_imag 
 _atom_type_scat_source 
 'C'  'C'   0.0033   0.0016 
 'International Tables Vol C Tables 4.2.6.8 and 6.1.1.4' 
 'H'  'H'   0.0000   0.0000 
 'International Tables Vol C Tables 4.2.6.8 and 6.1.1.4' 
 'N'  'N'   0.0061   0.0033 
 'International Tables Vol C Tables 4.2.6.8 and 6.1.1.4' 
 'O'  'O'   0.0106   0.0060 
 'International Tables Vol C Tables 4.2.6.8 and 6.1.1.4' 
 
_symmetry_cell_setting            triclinic 
_symmetry_space_group_name_H-M    P-1
 
loop_ 
 _symmetry_equiv_pos_as_xyz 
 'x, y, z' 
 '-x, -y, -z' 
 
_cell_length_a                    18.6118(15) 
_cell_length_b                    34.059(3) 
_cell_length_c                    37.687(3) 
_cell_angle_alpha                 67.605(2) 
_cell_angle_beta                  87.377(2) 
_cell_angle_gamma                 75.497(2) 
_cell_volume                      21351(3) 
_cell_formula_units_Z             8 
_cell_measurement_temperature     100(2) 
_cell_measurement_reflns_used     9794
_cell_measurement_theta_min       2.18
_cell_measurement_theta_max       22.10
 
_exptl_crystal_description        plate 
_exptl_crystal_colour             colourless 
_exptl_crystal_size_max           0.13 
_exptl_crystal_size_mid           0.11 
_exptl_crystal_size_min           0.02 
_exptl_crystal_density_meas       ? 
_exptl_crystal_density_diffrn     1.211 
_exptl_crystal_density_method     'not measured' 
_exptl_crystal_F_000              8332 
_exptl_absorpt_coefficient_mu     0.080 
_exptl_absorpt_correction_type    multi-scan
_exptl_absorpt_correction_T_min   0.7276
_exptl_absorpt_correction_T_max   1.0000
_exptl_absorpt_process_details    'SADABS 2008/1 (Sheldrick, 2008)'
 
_exptl_special_details 
; 
 ? 
; 
 
_diffrn_ambient_temperature       100(2) 
_diffrn_radiation_wavelength      0.71073 
_diffrn_radiation_type            'Mo K\a'
_diffrn_radiation_source          'Rotating Anode'
_diffrn_radiation_monochromator   confocal
_diffrn_measurement_device_type   'Rigaku Saturn724+ (2x2 bin mode)'
_diffrn_measurement_method        'profile data from \w-scans'
_diffrn_detector_area_resol_mean  28.5714
_diffrn_reflns_number             170920 
_diffrn_reflns_av_R_equivalents   0.0736 
_diffrn_reflns_av_sigmaI/netI     0.0926 
_diffrn_reflns_limit_h_min        -18 
_diffrn_reflns_limit_h_max        19 
_diffrn_reflns_limit_k_min        -33 
_diffrn_reflns_limit_k_max        35 
_diffrn_reflns_limit_l_min        -39 
_diffrn_reflns_limit_l_max        39 
_diffrn_reflns_theta_min          1.10 
_diffrn_reflns_theta_max          21.97 
_reflns_number_total              52177 
_reflns_number_gt                 30279 
_reflns_threshold_expression      >2sigma(I) 
 
_computing_data_collection        'CrystalClear-SM Expert 2.1 (Rigaku, 2011)'
_computing_cell_refinement        'Bruker AXS SAINT V7.68A'
_computing_data_reduction         'Bruker AXS SAINT V7.68A'
_computing_structure_solution     'SHELXD (Sheldrick, 2008)'
_computing_structure_refinement   'SHELXL (Sheldrick, 2008)'
_computing_molecular_graphics     ? 
_computing_publication_material   ? 
 
_refine_special_details 
; 
 Refinement of F^2^ against ALL reflections.  The weighted R-factor wR and 
 goodness of fit S are based on F^2^, conventional R-factors R are based 
 on F, with F set to zero for negative F^2^. The threshold expression of 
 F^2^ > 2sigma(F^2^) is used only for calculating R-factors(gt) etc. and is 
 not relevant to the choice of reflections for refinement.  R-factors based 
 on F^2^ are statistically about twice as large as those based on F, and R- 
 factors based on ALL data will be even larger. 
; 
 
_refine_ls_structure_factor_coef  Fsqd  
_refine_ls_matrix_type            full 
_refine_ls_weighting_scheme       calc  
_refine_ls_weighting_details 
 'calc w=1/[\s^2^(Fo^2^)+(0.1000P)^2^+35.0000P] where P=(Fo^2^+2Fc^2^)/3' 
_atom_sites_solution_primary      direct 
_atom_sites_solution_secondary    difmap 
_atom_sites_solution_hydrogens    difmap
_refine_ls_hydrogen_treatment     constr
_refine_ls_extinction_method      none 
_refine_ls_extinction_coef        ? 
_refine_ls_number_reflns          52177 
_refine_ls_number_parameters      4901 
_refine_ls_number_restraints      0 
_refine_ls_R_factor_all           0.1543 
_refine_ls_R_factor_gt            0.0910 
_refine_ls_wR_factor_ref          0.2599 
_refine_ls_wR_factor_gt           0.2262 
_refine_ls_goodness_of_fit_ref    1.112 
_refine_ls_restrained_S_all       1.112 
_refine_ls_shift/su_max           0.000 
_refine_ls_shift/su_mean          0.000 
 
loop_ 
 _atom_site_label 
 _atom_site_type_symbol 
 _atom_site_fract_x 
 _atom_site_fract_y 
 _atom_site_fract_z 
 _atom_site_U_iso_or_equiv 
 _atom_site_adp_type 
 _atom_site_occupancy 
 _atom_site_symmetry_multiplicity 
 _atom_site_calc_flag 
 _atom_site_refinement_flags 
 _atom_site_disorder_assembly 
 _atom_site_disorder_group 
N1 N 0.4130(3) 0.27833(16) 0.23827(15) 0.0441(13) Uani 1 1 d . . . 
N2 N 0.0427(3) 0.24897(18) 0.20262(15) 0.0515(14) Uani 1 1 d . . . 
N3 N 0.2289(3) 0.13187(18) 0.37603(15) 0.0498(14) Uani 1 1 d . . . 
N4 N 0.1279(3) 0.29946(17) 0.33678(14) 0.0437(13) Uani 1 1 d . . . 
N5 N 0.0615(3) 0.51767(17) 0.10212(16) 0.0550(15) Uani 1 1 d . . . 
N6 N -0.2189(3) 0.14044(16) 0.40700(15) 0.0446(13) Uani 1 1 d . . . 
N7 N 0.4106(4) 0.0472(2) 0.18744(19) 0.0717(18) Uani 1 1 d . . . 
N8 N 0.5288(3) 0.22817(15) 0.47955(14) 0.0382(12) Uani 1 1 d . . . 
N9 N 0.2187(3) 0.4551(2) 0.10559(16) 0.0589(16) Uani 1 1 d . . . 
N10 N 0.0825(3) 0.48065(17) 0.19029(15) 0.0480(14) Uani 1 1 d . . . 
N11 N -0.0381(4) 0.4594(2) 0.1051(2) 0.0672(18) Uani 1 1 d . . . 
N12 N -0.1671(3) 0.22678(15) 0.38772(14) 0.0397(13) Uani 1 1 d . . . 
N13 N -0.1751(3) 0.14930(17) 0.32387(15) 0.0508(14) Uani 1 1 d . . . 
N14 N -0.0784(3) 0.09266(17) 0.45185(15) 0.0471(14) Uani 1 1 d . . . 
N15 N 0.3029(4) 0.1325(2) 0.13674(18) 0.0742(19) Uani 1 1 d . . . 
N16 N 0.3051(4) 0.0359(2) 0.25501(18) 0.078(2) Uani 1 1 d . . . 
N17 N 0.5024(4) 0.0898(2) 0.22230(19) 0.0756(19) Uani 1 1 d . . . 
N18 N 0.5619(3) 0.27148(16) 0.39421(14) 0.0423(13) Uani 1 1 d . . . 
N19 N 0.4979(3) 0.14595(16) 0.46915(16) 0.0429(13) Uani 1 1 d . . . 
N20 N 0.3626(3) 0.27108(17) 0.47385(14) 0.0422(13) Uani 1 1 d . . . 
C1 C 0.3620(4) 0.3134(2) 0.21002(18) 0.0442(16) Uani 1 1 d . . . 
C2 C 0.3707(4) 0.3560(2) 0.19596(18) 0.0454(17) Uani 1 1 d . . . 
H2 H 0.4106 0.3622 0.2060 0.055 Uiso 1 1 calc R . . 
C3 C 0.3222(4) 0.3891(2) 0.16770(18) 0.0486(17) Uani 1 1 d . . . 
H3 H 0.3285 0.4181 0.1590 0.058 Uiso 1 1 calc R . . 
C4 C 0.2636(4) 0.3815(2) 0.15134(18) 0.0491(17) Uani 1 1 d . . . 
C5 C 0.2557(4) 0.3387(2) 0.1655(2) 0.059(2) Uani 1 1 d . . . 
H5 H 0.2167 0.3323 0.1549 0.071 Uiso 1 1 calc R . . 
C6 C 0.3033(4) 0.3053(2) 0.1945(2) 0.0556(19) Uani 1 1 d . . . 
H6 H 0.2959 0.2766 0.2040 0.067 Uiso 1 1 calc R . . 
C7 C 0.2131(4) 0.4163(3) 0.1195(2) 0.0590(19) Uani 1 1 d . . . 
H7 H 0.1750 0.4089 0.1092 0.071 Uiso 1 1 calc R . . 
C8 C 0.4235(4) 0.2353(2) 0.23773(18) 0.0453(17) Uani 1 1 d . . . 
C9 C 0.4557(4) 0.2257(2) 0.2076(2) 0.060(2) Uani 1 1 d . . . 
H9 H 0.4715 0.2474 0.1866 0.072 Uiso 1 1 calc R . . 
C10 C 0.4650(4) 0.1829(3) 0.2083(2) 0.069(2) Uani 1 1 d . . . 
H10 H 0.4876 0.1757 0.1877 0.083 Uiso 1 1 calc R . . 
C11 C 0.4409(4) 0.1513(2) 0.2392(2) 0.0532(18) Uani 1 1 d . . . 
C12 C 0.4067(4) 0.1627(2) 0.26754(19) 0.0518(18) Uani 1 1 d . . . 
H12 H 0.3883 0.1416 0.2879 0.062 Uiso 1 1 calc R . . 
C13 C 0.3977(4) 0.2038(2) 0.26783(19) 0.0492(17) Uani 1 1 d . . . 
H13 H 0.3741 0.2108 0.2883 0.059 Uiso 1 1 calc R . . 
C14 C 0.4559(4) 0.1048(2) 0.2422(2) 0.063(2) Uani 1 1 d . . . 
H14 H 0.4294 0.0860 0.2599 0.076 Uiso 1 1 calc R . . 
C15 C 0.4340(4) 0.2819(2) 0.27217(18) 0.0428(16) Uani 1 1 d . . . 
C16 C 0.4994(3) 0.2533(2) 0.29349(18) 0.0420(16) Uani 1 1 d . . . 
H16 H 0.5291 0.2321 0.2847 0.050 Uiso 1 1 calc R . . 
C17 C 0.5213(3) 0.2555(2) 0.32725(18) 0.0403(16) Uani 1 1 d . . . 
H17 H 0.5658 0.2360 0.3412 0.048 Uiso 1 1 calc R . . 
C18 C 0.4781(3) 0.28624(19) 0.34083(17) 0.0362(15) Uani 1 1 d . . . 
C19 C 0.4132(3) 0.3139(2) 0.31988(18) 0.0419(16) Uani 1 1 d . . . 
H19 H 0.3825 0.3345 0.3290 0.050 Uiso 1 1 calc R . . 
C20 C 0.3924(3) 0.3119(2) 0.28595(18) 0.0432(16) Uani 1 1 d . . . 
H20 H 0.3483 0.3318 0.2718 0.052 Uiso 1 1 calc R . . 
C21 C 0.4997(4) 0.2915(2) 0.37509(18) 0.0432(17) Uani 1 1 d . . . 
H21 H 0.4652 0.3112 0.3838 0.052 Uiso 1 1 calc R . . 
C22 C 0.0055(4) 0.2232(2) 0.23246(18) 0.0503(18) Uani 1 1 d . . . 
C23 C -0.0705(4) 0.2370(2) 0.23676(19) 0.0520(18) Uani 1 1 d . . . 
H23 H -0.0979 0.2652 0.2199 0.062 Uiso 1 1 calc R . . 
C24 C -0.1067(4) 0.2103(2) 0.26530(18) 0.0487(17) Uani 1 1 d . . . 
H24 H -0.1584 0.2204 0.2675 0.058 Uiso 1 1 calc R . . 
C25 C -0.0683(4) 0.1690(2) 0.29065(19) 0.0478(17) Uani 1 1 d . . . 
C26 C 0.0077(4) 0.1552(2) 0.28668(19) 0.0544(19) Uani 1 1 d . . . 
H26 H 0.0351 0.1272 0.3038 0.065 Uiso 1 1 calc R . . 
C27 C 0.0439(4) 0.1820(2) 0.2579(2) 0.0565(19) Uani 1 1 d . . . 
H27 H 0.0956 0.1718 0.2556 0.068 Uiso 1 1 calc R . . 
C28 C -0.1059(4) 0.1401(2) 0.32013(19) 0.0521(18) Uani 1 1 d . . . 
H28 H -0.0766 0.1128 0.3374 0.063 Uiso 1 1 calc R . . 
C29 C 0.1076(4) 0.2274(2) 0.18899(19) 0.0517(18) Uani 1 1 d . . . 
C30 C 0.1048(4) 0.1937(2) 0.17736(19) 0.0557(19) Uani 1 1 d . . . 
H30 H 0.0597 0.1852 0.1784 0.067 Uiso 1 1 calc R . . 
C31 C 0.1678(4) 0.1724(2) 0.16411(19) 0.058(2) Uani 1 1 d . . . 
H31 H 0.1655 0.1495 0.1559 0.070 Uiso 1 1 calc R . . 
C32 C 0.2345(4) 0.1849(2) 0.16294(19) 0.0549(19) Uani 1 1 d . . . 
C33 C 0.2357(4) 0.2189(2) 0.1741(2) 0.0575(19) Uani 1 1 d . . . 
H33 H 0.2802 0.2280 0.1728 0.069 Uiso 1 1 calc R . . 
C34 C 0.1730(4) 0.2398(2) 0.1871(2) 0.0571(19) Uani 1 1 d . . . 
H34 H 0.1751 0.2630 0.1948 0.069 Uiso 1 1 calc R . . 
C35 C 0.3033(4) 0.1622(3) 0.1497(2) 0.062(2) Uani 1 1 d . . . 
H35 H 0.3484 0.1700 0.1509 0.074 Uiso 1 1 calc R . . 
C36 C 0.0223(4) 0.2957(2) 0.1874(2) 0.0497(17) Uani 1 1 d . . . 
C37 C 0.0309(4) 0.3181(2) 0.1492(2) 0.0528(18) Uani 1 1 d . . . 
H37 H 0.0500 0.3024 0.1332 0.063 Uiso 1 1 calc R . . 
C38 C 0.0116(4) 0.3640(2) 0.1337(2) 0.0567(19) Uani 1 1 d . . . 
H38 H 0.0178 0.3793 0.1073 0.068 Uiso 1 1 calc R . . 
C39 C -0.0160(4) 0.3871(2) 0.1563(2) 0.0579(19) Uani 1 1 d . . . 
C40 C -0.0233(4) 0.3644(3) 0.1944(2) 0.063(2) Uani 1 1 d . . . 
H40 H -0.0412 0.3803 0.2104 0.076 Uiso 1 1 calc R . . 
C41 C -0.0053(4) 0.3186(3) 0.2106(2) 0.060(2) Uani 1 1 d . . . 
H41 H -0.0118 0.3034 0.2371 0.072 Uiso 1 1 calc R . . 
C42 C -0.0392(4) 0.4363(2) 0.1399(2) 0.060(2) Uani 1 1 d . . . 
H42 H -0.0556 0.4507 0.1571 0.073 Uiso 1 1 calc R . . 
C43 C 0.2902(3) 0.1402(2) 0.39156(19) 0.0449(17) Uani 1 1 d . . . 
C44 C 0.3146(3) 0.1181(2) 0.42969(19) 0.0434(16) Uani 1 1 d . . . 
H44 H 0.2911 0.0967 0.4464 0.052 Uiso 1 1 calc R . . 
C45 C 0.3735(3) 0.12721(19) 0.44354(18) 0.0394(15) Uani 1 1 d . . . 
H45 H 0.3891 0.1125 0.4700 0.047 Uiso 1 1 calc R . . 
C46 C 0.4104(3) 0.1575(2) 0.41952(18) 0.0417(16) Uani 1 1 d . . . 
C47 C 0.3865(4) 0.1787(2) 0.3818(2) 0.0485(18) Uani 1 1 d . . . 
H47 H 0.4113 0.1993 0.3650 0.058 Uiso 1 1 calc R . . 
C48 C 0.3270(4) 0.1708(2) 0.36735(19) 0.0548(19) Uani 1 1 d . . . 
H48 H 0.3109 0.1862 0.3410 0.066 Uiso 1 1 calc R . . 
C49 C 0.4757(3) 0.1644(2) 0.4341(2) 0.0408(16) Uani 1 1 d . . . 
H49 H 0.5022 0.1835 0.4167 0.049 Uiso 1 1 calc R . . 
C50 C 0.2456(4) 0.1176(2) 0.3449(2) 0.0503(18) Uani 1 1 d . . . 
C51 C 0.2791(4) 0.0739(2) 0.3518(2) 0.0564(19) Uani 1 1 d . . . 
H51 H 0.2943 0.0537 0.3773 0.068 Uiso 1 1 calc R . . 
C52 C 0.2906(4) 0.0597(2) 0.3218(2) 0.0555(19) Uani 1 1 d . . . 
H52 H 0.3139 0.0298 0.3267 0.067 Uiso 1 1 calc R . . 
C53 C 0.2679(4) 0.0895(2) 0.28393(19) 0.0533(18) Uani 1 1 d . . . 
C54 C 0.2358(4) 0.1332(2) 0.2769(2) 0.0561(19) Uani 1 1 d . . . 
H54 H 0.2221 0.1536 0.2513 0.067 Uiso 1 1 calc R . . 
C55 C 0.2236(4) 0.1472(2) 0.3072(2) 0.0550(19) Uani 1 1 d . . . 
H55 H 0.2001 0.1771 0.3023 0.066 Uiso 1 1 calc R . . 
C56 C 0.2738(4) 0.0751(3) 0.2516(2) 0.065(2) Uani 1 1 d . . . 
H56 H 0.2534 0.0960 0.2270 0.078 Uiso 1 1 calc R . . 
C57 C 0.1635(4) 0.1284(2) 0.39450(18) 0.0445(16) Uani 1 1 d . . . 
C58 C 0.1147(4) 0.1078(2) 0.3849(2) 0.059(2) Uani 1 1 d . . . 
H58 H 0.1275 0.0954 0.3660 0.071 Uiso 1 1 calc R . . 
C59 C 0.0485(4) 0.1053(2) 0.40265(19) 0.0546(19) Uani 1 1 d . . . 
H59 H 0.0172 0.0909 0.3959 0.066 Uiso 1 1 calc R . . 
C60 C 0.0264(4) 0.1232(2) 0.42980(18) 0.0427(16) Uani 1 1 d . . . 
C61 C 0.0738(4) 0.14421(19) 0.43911(18) 0.0461(17) Uani 1 1 d . . . 
H61 H 0.0594 0.1577 0.4571 0.055 Uiso 1 1 calc R . . 
C62 C 0.1418(4) 0.14562(19) 0.42234(18) 0.0460(17) Uani 1 1 d . . . 
H62 H 0.1742 0.1587 0.4302 0.055 Uiso 1 1 calc R . . 
C63 C -0.0431(3) 0.1215(2) 0.44861(18) 0.0460(17) Uani 1 1 d . . . 
H63 H -0.0635 0.1430 0.4591 0.055 Uiso 1 1 calc R . . 
C64 C 0.0679(3) 0.27911(19) 0.34455(17) 0.0402(16) Uani 1 1 d . . . 
C65 C 0.0284(3) 0.27555(18) 0.37723(17) 0.0385(15) Uani 1 1 d . . . 
H65 H 0.0425 0.2858 0.3954 0.046 Uiso 1 1 calc R . . 
C66 C -0.0316(3) 0.25709(18) 0.38337(17) 0.0372(15) Uani 1 1 d . . . 
H66 H -0.0576 0.2543 0.4061 0.045 Uiso 1 1 calc R . . 
C67 C -0.0547(3) 0.24267(18) 0.35727(17) 0.0352(15) Uani 1 1 d . . . 
C68 C -0.0131(3) 0.2454(2) 0.32524(18) 0.0456(17) Uani 1 1 d . . . 
H68 H -0.0266 0.2347 0.3073 0.055 Uiso 1 1 calc R . . 
C69 C 0.0474(3) 0.2633(2) 0.31900(18) 0.0447(17) Uani 1 1 d . . . 
H69 H 0.0750 0.2647 0.2969 0.054 Uiso 1 1 calc R . . 
C70 C -0.1246(3) 0.22987(18) 0.35987(18) 0.0414(16) Uani 1 1 d . . . 
H70 H -0.1394 0.2234 0.3393 0.050 Uiso 1 1 calc R . . 
C71 C 0.1293(3) 0.3341(2) 0.30059(17) 0.0397(15) Uani 1 1 d . . . 
C72 C 0.0646(4) 0.3647(2) 0.28335(17) 0.0407(16) Uani 1 1 d . . . 
H72 H 0.0186 0.3613 0.2945 0.049 Uiso 1 1 calc R . . 
C73 C 0.0659(3) 0.4004(2) 0.24987(18) 0.0416(16) Uani 1 1 d . . . 
H73 H 0.0208 0.4215 0.2383 0.050 Uiso 1 1 calc R . . 
C74 C 0.1319(4) 0.4056(2) 0.23323(17) 0.0403(16) Uani 1 1 d . . . 
C75 C 0.1961(4) 0.3734(2) 0.24947(19) 0.0560(19) Uani 1 1 d . . . 
H75 H 0.2418 0.3758 0.2376 0.067 Uiso 1 1 calc R . . 
C76 C 0.1946(4) 0.3374(2) 0.28323(19) 0.0560(19) Uani 1 1 d . . . 
H76 H 0.2390 0.3152 0.2941 0.067 Uiso 1 1 calc R . . 
C77 C 0.1366(4) 0.4470(2) 0.20177(18) 0.0477(17) Uani 1 1 d . . . 
H77 H 0.1823 0.4484 0.1896 0.057 Uiso 1 1 calc R . . 
C78 C 0.1824(3) 0.2875(2) 0.36712(18) 0.0388(15) Uani 1 1 d . . . 
C79 C 0.2187(4) 0.3171(2) 0.37108(19) 0.0447(17) Uani 1 1 d . . . 
H79 H 0.2087 0.3463 0.3525 0.054 Uiso 1 1 calc R . . 
C80 C 0.2681(3) 0.3045(2) 0.40128(18) 0.0414(16) Uani 1 1 d . . . 
H80 H 0.2927 0.3249 0.4032 0.050 Uiso 1 1 calc R . . 
C81 C 0.2833(3) 0.26213(19) 0.42937(18) 0.0380(15) Uani 1 1 d . . . 
C82 C 0.2467(3) 0.2332(2) 0.42517(19) 0.0458(17) Uani 1 1 d . . . 
H82 H 0.2563 0.2042 0.4440 0.055 Uiso 1 1 calc R . . 
C83 C 0.1973(3) 0.24506(19) 0.39476(19) 0.0439(16) Uani 1 1 d . . . 
H83 H 0.1734 0.2244 0.3926 0.053 Uiso 1 1 calc R . . 
C84 C 0.3334(3) 0.2469(2) 0.46335(18) 0.0408(16) Uani 1 1 d . . . 
H84 H 0.3451 0.2164 0.4789 0.049 Uiso 1 1 calc R . . 
C85 C 0.1272(4) 0.5254(2) 0.0805(2) 0.063(2) Uani 1 1 d . . . 
H85A H 0.1606 0.5328 0.0955 0.075 Uiso 1 1 calc R . . 
H85B H 0.1117 0.5510 0.0560 0.075 Uiso 1 1 calc R . . 
C86 C 0.1696(4) 0.4863(2) 0.0720(2) 0.061(2) Uani 1 1 d . . . 
H86A H 0.1344 0.4719 0.0660 0.073 Uiso 1 1 calc R . . 
H86B H 0.1996 0.4960 0.0494 0.073 Uiso 1 1 calc R . . 
C87 C -0.0019(4) 0.5286(2) 0.0759(2) 0.062(2) Uani 1 1 d . . . 
H87A H 0.0152 0.5196 0.0543 0.074 Uiso 1 1 calc R . . 
H87B H -0.0223 0.5609 0.0653 0.074 Uiso 1 1 calc R . . 
C88 C -0.0626(4) 0.5072(2) 0.0946(2) 0.066(2) Uani 1 1 d . . . 
H88A H -0.0763 0.5135 0.1179 0.079 Uiso 1 1 calc R . . 
H88B H -0.1071 0.5195 0.0767 0.079 Uiso 1 1 calc R . . 
C89 C 0.0449(4) 0.5418(2) 0.12745(19) 0.0561(19) Uani 1 1 d . . . 
H89A H -0.0066 0.5427 0.1355 0.067 Uiso 1 1 calc R . . 
H89B H 0.0481 0.5724 0.1131 0.067 Uiso 1 1 calc R . . 
C90 C 0.0980(4) 0.5212(2) 0.16305(19) 0.0537(19) Uani 1 1 d . . . 
H90A H 0.1497 0.5148 0.1552 0.064 Uiso 1 1 calc R . . 
H90B H 0.0932 0.5423 0.1757 0.064 Uiso 1 1 calc R . . 
C91 C -0.2588(4) 0.1355(2) 0.37653(19) 0.0490(17) Uani 1 1 d . . . 
H91A H -0.2892 0.1646 0.3596 0.059 Uiso 1 1 calc R . . 
H91B H -0.2929 0.1165 0.3884 0.059 Uiso 1 1 calc R . . 
C92 C -0.2055(4) 0.1157(2) 0.35265(19) 0.0545(19) Uani 1 1 d . . . 
H92A H -0.1645 0.0921 0.3696 0.065 Uiso 1 1 calc R . . 
H92B H -0.2319 0.1025 0.3397 0.065 Uiso 1 1 calc R . . 
C93 C -0.2100(4) 0.1013(2) 0.44280(19) 0.0503(18) Uani 1 1 d . . . 
H93A H -0.1995 0.0749 0.4363 0.060 Uiso 1 1 calc R . . 
H93B H -0.2573 0.1028 0.4559 0.060 Uiso 1 1 calc R . . 
C94 C -0.1490(4) 0.0965(2) 0.46973(19) 0.0496(18) Uani 1 1 d . . . 
H94A H -0.1596 0.1224 0.4769 0.060 Uiso 1 1 calc R . . 
H94B H -0.1464 0.0701 0.4934 0.060 Uiso 1 1 calc R . . 
C95 C -0.2567(3) 0.1807(2) 0.41327(18) 0.0451(16) Uani 1 1 d . . . 
H95A H -0.2397 0.1783 0.4387 0.054 Uiso 1 1 calc R . . 
H95B H -0.3110 0.1835 0.4134 0.054 Uiso 1 1 calc R . . 
C96 C -0.2411(3) 0.2214(2) 0.38226(19) 0.0476(17) Uani 1 1 d . . . 
H96A H -0.2452 0.2195 0.3569 0.057 Uiso 1 1 calc R . . 
H96B H -0.2792 0.2475 0.3822 0.057 Uiso 1 1 calc R . . 
C97 C 0.4910(5) 0.0379(3) 0.1928(2) 0.077(2) Uani 1 1 d . . . 
H97A H 0.5100 0.0582 0.1701 0.093 Uiso 1 1 calc R . . 
H97B H 0.5136 0.0076 0.1945 0.093 Uiso 1 1 calc R . . 
C98 C 0.5148(5) 0.0426(2) 0.2292(3) 0.084(3) Uani 1 1 d . . . 
H98A H 0.4857 0.0287 0.2509 0.100 Uiso 1 1 calc R . . 
H98B H 0.5681 0.0276 0.2361 0.100 Uiso 1 1 calc R . . 
C99 C 0.3879(5) 0.0620(3) 0.1470(2) 0.077(2) Uani 1 1 d . . . 
H99A H 0.3417 0.0533 0.1451 0.092 Uiso 1 1 calc R . . 
H99B H 0.4269 0.0470 0.1344 0.092 Uiso 1 1 calc R . . 
C100 C 0.3747(5) 0.1105(3) 0.1260(2) 0.075(2) Uani 1 1 d . . . 
H10A H 0.4155 0.1207 0.1327 0.090 Uiso 1 1 calc R . . 
H10B H 0.3734 0.1178 0.0979 0.090 Uiso 1 1 calc R . . 
C101 C 0.3826(5) 0.0095(3) 0.2112(3) 0.084(3) Uani 1 1 d . . . 
H10C H 0.4144 -0.0074 0.2352 0.101 Uiso 1 1 calc R . . 
H10D H 0.3843 -0.0101 0.1973 0.101 Uiso 1 1 calc R . . 
C102 C 0.3035(5) 0.0254(3) 0.2208(2) 0.084(3) Uani 1 1 d . . . 
H10E H 0.2772 0.0517 0.1988 0.101 Uiso 1 1 calc R . . 
H10F H 0.2766 0.0022 0.2258 0.101 Uiso 1 1 calc R . . 
C103 C 0.5937(3) 0.24434(19) 0.46357(17) 0.0400(15) Uani 1 1 d . . . 
H10G H 0.6314 0.2204 0.4594 0.048 Uiso 1 1 calc R . . 
H10H H 0.6158 0.2523 0.4825 0.048 Uiso 1 1 calc R . . 
C104 C 0.5761(3) 0.28353(19) 0.42623(17) 0.0415(16) Uani 1 1 d . . . 
H10I H 0.5318 0.3053 0.4288 0.050 Uiso 1 1 calc R . . 
H10J H 0.6183 0.2974 0.4205 0.050 Uiso 1 1 calc R . . 
C105 C 0.5518(4) 0.18101(19) 0.50411(18) 0.0443(16) Uani 1 1 d . . . 
H10K H 0.5121 0.1731 0.5218 0.053 Uiso 1 1 calc R . . 
H10L H 0.5972 0.1752 0.5199 0.053 Uiso 1 1 calc R . . 
C106 C 0.5669(3) 0.1525(2) 0.48077(19) 0.0472(17) Uani 1 1 d . . . 
H10M H 0.5926 0.1665 0.4576 0.057 Uiso 1 1 calc R . . 
H10N H 0.6002 0.1237 0.4962 0.057 Uiso 1 1 calc R . . 
C107 C 0.4890(3) 0.2536(2) 0.50167(18) 0.0428(16) Uani 1 1 d . . . 
H10O H 0.4879 0.2849 0.4875 0.051 Uiso 1 1 calc R . . 
H10P H 0.5169 0.2436 0.5266 0.051 Uiso 1 1 calc R . . 
C108 C 0.4104(3) 0.2496(2) 0.50925(18) 0.0467(17) Uani 1 1 d . . . 
H10Q H 0.4104 0.2182 0.5209 0.056 Uiso 1 1 calc R . . 
H10R H 0.3903 0.2632 0.5278 0.056 Uiso 1 1 calc R . . 
N21 N 0.7209(3) 0.56257(16) 0.18702(15) 0.0447(13) Uani 1 1 d . . . 
N22 N 0.8630(3) 0.37381(15) 0.36061(13) 0.0384(12) Uani 1 1 d . . . 
N23 N 0.6973(3) 0.57960(15) 0.37239(14) 0.0404(13) Uani 1 1 d . . . 
N24 N 0.4998(3) 0.45898(16) 0.33274(14) 0.0425(13) Uani 1 1 d . . . 
N25 N 0.6701(3) 0.31379(17) 0.18238(14) 0.0451(13) Uani 1 1 d . . . 
N26 N 0.6553(3) 0.35132(16) 0.57621(14) 0.0411(13) Uani 1 1 d . . . 
N27 N 1.1456(3) 0.56555(16) 0.28150(14) 0.0408(13) Uani 1 1 d . . . 
N28 N 0.3063(3) 0.74468(18) 0.20876(17) 0.0570(16) Uani 1 1 d . . . 
N29 N 0.7509(3) 0.38796(17) 0.14955(16) 0.0485(14) Uani 1 1 d . . . 
N30 N 0.5389(3) 0.37640(17) 0.20377(14) 0.0432(13) Uani 1 1 d . . . 
N31 N 0.7342(3) 0.28390(16) 0.26293(14) 0.0410(13) Uani 1 1 d . . . 
N32 N 0.5778(3) 0.33610(16) 0.51403(15) 0.0459(14) Uani 1 1 d . . . 
N33 N 0.8039(3) 0.34602(17) 0.53769(15) 0.0422(13) Uani 1 1 d . . . 
N34 N 0.6020(3) 0.45237(16) 0.53444(16) 0.0444(13) Uani 1 1 d . . . 
N35 N 1.0172(3) 0.61097(16) 0.21892(15) 0.0456(14) Uani 1 1 d . . . 
N36 N 1.1201(3) 0.47418(16) 0.29514(14) 0.0431(13) Uani 1 1 d . . . 
N37 N 1.0452(3) 0.57327(16) 0.34699(14) 0.0425(13) Uani 1 1 d . . . 
N38 N 0.4062(4) 0.7085(2) 0.15273(19) 0.0747(19) Uani 1 1 d . . . 
N39 N 0.2851(3) 0.65624(19) 0.2648(2) 0.0617(17) Uani 1 1 d . . . 
N40 N 0.4387(3) 0.73823(18) 0.25955(16) 0.0562(15) Uani 1 1 d . . . 
C109 C 0.7310(4) 0.5207(2) 0.18515(18) 0.0435(16) Uani 1 1 d . . . 
C110 C 0.6925(4) 0.5157(2) 0.15709(18) 0.0439(16) Uani 1 1 d . . . 
H110 H 0.6568 0.5400 0.1399 0.053 Uiso 1 1 calc R . . 
C111 C 0.7062(3) 0.4753(2) 0.15419(18) 0.0445(16) Uani 1 1 d . . . 
H111 H 0.6808 0.4726 0.1343 0.053 Uiso 1 1 calc R . . 
C112 C 0.7559(4) 0.4385(2) 0.17953(19) 0.0445(17) Uani 1 1 d . . . 
C113 C 0.7914(4) 0.4435(2) 0.2084(2) 0.0509(18) Uani 1 1 d . . . 
H113 H 0.8242 0.4187 0.2268 0.061 Uiso 1 1 calc R . . 
C114 C 0.7796(4) 0.4846(2) 0.21096(19) 0.0506(18) Uani 1 1 d . . . 
H114 H 0.8054 0.4875 0.2306 0.061 Uiso 1 1 calc R . . 
C115 C 0.7734(4) 0.3948(2) 0.1771(2) 0.0469(17) Uani 1 1 d . . . 
H115 H 0.8033 0.3706 0.1974 0.056 Uiso 1 1 calc R . . 
C116 C 0.7811(4) 0.57278(19) 0.20076(18) 0.0419(16) Uani 1 1 d . . . 
C117 C 0.8494(4) 0.5679(2) 0.18406(18) 0.0486(17) Uani 1 1 d . . . 
H117 H 0.8560 0.5573 0.1639 0.058 Uiso 1 1 calc R . . 
C118 C 0.9067(4) 0.5784(2) 0.19662(19) 0.0473(17) Uani 1 1 d . . . 
H118 H 0.9528 0.5752 0.1848 0.057 Uiso 1 1 calc R . . 
C119 C 0.8994(4) 0.5934(2) 0.22596(18) 0.0428(16) Uani 1 1 d . . . 
C120 C 0.8317(4) 0.5971(2) 0.24325(19) 0.0484(17) Uani 1 1 d . . . 
H120 H 0.8258 0.6069 0.2639 0.058 Uiso 1 1 calc R . . 
C121 C 0.7734(4) 0.5868(2) 0.23087(18) 0.0480(17) Uani 1 1 d . . . 
H121 H 0.7276 0.5893 0.2431 0.058 Uiso 1 1 calc R . . 
C122 C 0.9584(4) 0.6089(2) 0.23719(18) 0.0449(17) Uani 1 1 d . . . 
H122 H 0.9523 0.6175 0.2585 0.054 Uiso 1 1 calc R . . 
C123 C 0.6479(4) 0.5898(2) 0.18446(18) 0.0453(17) Uani 1 1 d . . . 
C124 C 0.6320(4) 0.6343(2) 0.1613(2) 0.0552(19) Uani 1 1 d . . . 
H124 H 0.6698 0.6466 0.1470 0.066 Uiso 1 1 calc R . . 
C125 C 0.5612(4) 0.6604(2) 0.1592(2) 0.0555(19) Uani 1 1 d . . . 
H125 H 0.5510 0.6907 0.1433 0.067 Uiso 1 1 calc R . . 
C126 C 0.5046(4) 0.6436(2) 0.1797(2) 0.0582(19) Uani 1 1 d . . . 
C127 C 0.5213(4) 0.5993(2) 0.2030(2) 0.062(2) Uani 1 1 d . . . 
H127 H 0.4836 0.5870 0.2173 0.075 Uiso 1 1 calc R . . 
C128 C 0.5925(4) 0.5730(2) 0.2056(2) 0.061(2) Uani 1 1 d . . . 
H128 H 0.6033 0.5429 0.2222 0.073 Uiso 1 1 calc R . . 
C129 C 0.4270(4) 0.6695(3) 0.1761(2) 0.066(2) Uani 1 1 d . . . 
H129 H 0.3917 0.6562 0.1920 0.079 Uiso 1 1 calc R . . 
C130 C 0.8415(3) 0.37425(19) 0.39748(17) 0.0370(15) Uani 1 1 d . . . 
C131 C 0.8516(3) 0.33574(19) 0.42979(17) 0.0393(15) Uani 1 1 d . . . 
H131 H 0.8700 0.3082 0.4275 0.047 Uiso 1 1 calc R . . 
C132 C 0.8348(3) 0.33748(19) 0.46536(17) 0.0411(16) Uani 1 1 d . . . 
H132 H 0.8420 0.3110 0.4875 0.049 Uiso 1 1 calc R . . 
C133 C 0.8073(3) 0.37777(19) 0.46914(17) 0.0350(15) Uani 1 1 d . . . 
C134 C 0.7960(3) 0.4160(2) 0.43634(17) 0.0393(15) Uani 1 1 d . . . 
H134 H 0.7760 0.4436 0.4383 0.047 Uiso 1 1 calc R . . 
C135 C 0.8136(3) 0.41427(19) 0.40117(17) 0.0393(15) Uani 1 1 d . . . 
H135 H 0.8066 0.4407 0.3791 0.047 Uiso 1 1 calc R . . 
C136 C 0.7920(3) 0.3796(2) 0.50734(18) 0.0389(15) Uani 1 1 d . . . 
H136 H 0.7724 0.4075 0.5089 0.047 Uiso 1 1 calc R . . 
C137 C 0.9088(3) 0.40243(19) 0.34078(17) 0.0365(15) Uani 1 1 d . . . 
C138 C 0.9768(3) 0.39699(19) 0.35858(18) 0.0398(16) Uani 1 1 d . . . 
H138 H 0.9915 0.3750 0.3835 0.048 Uiso 1 1 calc R . . 
C139 C 1.0226(3) 0.42393(19) 0.33958(17) 0.0387(15) Uani 1 1 d . . . 
H139 H 1.0692 0.4198 0.3516 0.046 Uiso 1 1 calc R . . 
C140 C 1.0024(3) 0.45655(19) 0.30373(17) 0.0379(15) Uani 1 1 d . . . 
C141 C 0.9333(3) 0.46268(19) 0.28686(18) 0.0410(16) Uani 1 1 d . . . 
H141 H 0.9177 0.4857 0.2625 0.049 Uiso 1 1 calc R . . 
C142 C 0.8868(3) 0.43558(19) 0.30513(17) 0.0405(16) Uani 1 1 d . . . 
H142 H 0.8402 0.4398 0.2931 0.049 Uiso 1 1 calc R . . 
C143 C 1.0553(4) 0.48138(19) 0.28154(18) 0.0403(16) Uani 1 1 d . . . 
H143 H 1.0401 0.5032 0.2566 0.048 Uiso 1 1 calc R . . 
C144 C 0.8232(3) 0.35740(18) 0.34058(17) 0.0377(15) Uani 1 1 d . . . 
C145 C 0.8524(3) 0.34699(19) 0.30985(17) 0.0402(16) Uani 1 1 d . . . 
H145 H 0.8998 0.3514 0.3017 0.048 Uiso 1 1 calc R . . 
C146 C 0.8141(3) 0.33032(19) 0.29105(17) 0.0377(15) Uani 1 1 d . . . 
H146 H 0.8357 0.3230 0.2703 0.045 Uiso 1 1 calc R . . 
C147 C 0.7440(3) 0.32413(18) 0.30205(16) 0.0348(15) Uani 1 1 d . . . 
C148 C 0.7146(3) 0.33462(19) 0.33258(17) 0.0394(15) Uani 1 1 d . . . 
H148 H 0.6667 0.3307 0.3403 0.047 Uiso 1 1 calc R . . 
C149 C 0.7533(3) 0.35063(19) 0.35202(17) 0.0398(16) Uani 1 1 d . . . 
H149 H 0.7324 0.3571 0.3733 0.048 Uiso 1 1 calc R . . 
C150 C 0.7037(4) 0.30350(19) 0.28439(17) 0.0413(16) Uani 1 1 d . . . 
H150 H 0.6527 0.3050 0.2893 0.050 Uiso 1 1 calc R . . 
C151 C 0.6455(3) 0.61093(19) 0.34315(18) 0.0397(16) Uani 1 1 d . . . 
C152 C 0.5794(4) 0.6331(2) 0.35296(19) 0.0462(17) Uani 1 1 d . . . 
H152 H 0.5685 0.6263 0.3792 0.055 Uiso 1 1 calc R . . 
C153 C 0.5285(4) 0.6657(2) 0.32367(19) 0.0479(17) Uani 1 1 d . . . 
H153 H 0.4835 0.6812 0.3303 0.057 Uiso 1 1 calc R . . 
C154 C 0.5431(4) 0.6754(2) 0.28547(19) 0.0464(17) Uani 1 1 d . . . 
C155 C 0.6092(4) 0.6526(2) 0.27623(19) 0.0504(18) Uani 1 1 d . . . 
H155 H 0.6200 0.6590 0.2500 0.060 Uiso 1 1 calc R . . 
C156 C 0.6601(4) 0.6204(2) 0.30516(19) 0.0469(17) Uani 1 1 d . . . 
H156 H 0.7051 0.6049 0.2985 0.056 Uiso 1 1 calc R . . 
C157 C 0.4950(4) 0.7117(2) 0.2540(2) 0.0540(18) Uani 1 1 d . . . 
H157 H 0.5066 0.7154 0.2283 0.065 Uiso 1 1 calc R . . 
C158 C 0.7747(3) 0.57190(19) 0.36483(17) 0.0377(15) Uani 1 1 d . . . 
C159 C 0.8097(3) 0.6057(2) 0.35495(17) 0.0422(16) Uani 1 1 d . . . 
H159 H 0.7822 0.6339 0.3534 0.051 Uiso 1 1 calc R . . 
C160 C 0.8836(4) 0.59913(19) 0.34736(17) 0.0439(16) Uani 1 1 d . . . 
H160 H 0.9066 0.6228 0.3405 0.053 Uiso 1 1 calc R . . 
C161 C 0.9259(3) 0.55723(19) 0.34966(17) 0.0382(15) Uani 1 1 d . . . 
C162 C 0.8890(3) 0.5243(2) 0.35857(17) 0.0435(16) Uani 1 1 d . . . 
H162 H 0.9156 0.4962 0.3594 0.052 Uiso 1 1 calc R . . 
C163 C 0.8151(4) 0.5313(2) 0.36621(18) 0.0458(17) Uani 1 1 d . . . 
H163 H 0.7914 0.5080 0.3725 0.055 Uiso 1 1 calc R . . 
C164 C 1.0072(3) 0.5477(2) 0.34650(16) 0.0422(16) Uani 1 1 d . . . 
H164 H 1.0320 0.5209 0.3440 0.051 Uiso 1 1 calc R . . 
C165 C 0.6742(3) 0.54690(19) 0.40401(18) 0.0390(16) Uani 1 1 d . . . 
C166 C 0.7015(4) 0.5369(2) 0.44099(18) 0.0450(17) Uani 1 1 d . . . 
H166 H 0.7371 0.5508 0.4448 0.054 Uiso 1 1 calc R . . 
C167 C 0.6768(3) 0.50682(19) 0.47221(18) 0.0417(16) Uani 1 1 d . . . 
H167 H 0.6961 0.5001 0.4974 0.050 Uiso 1 1 calc R . . 
C168 C 0.6242(3) 0.48620(19) 0.46738(18) 0.0400(16) Uani 1 1 d . . . 
C169 C 0.5993(3) 0.4955(2) 0.43038(19) 0.0440(16) Uani 1 1 d . . . 
H169 H 0.5646 0.4811 0.4264 0.053 Uiso 1 1 calc R . . 
C170 C 0.6242(4) 0.5256(2) 0.39888(18) 0.0449(16) Uani 1 1 d . . . 
H170 H 0.6066 0.5315 0.3737 0.054 Uiso 1 1 calc R . . 
C171 C 0.5921(3) 0.45663(19) 0.5002(2) 0.0420(16) Uani 1 1 d . . . 
H171 H 0.5626 0.4400 0.4952 0.050 Uiso 1 1 calc R . . 
C172 C 0.4616(3) 0.5034(2) 0.32105(17) 0.0374(15) Uani 1 1 d . . . 
C173 C 0.4142(3) 0.5241(2) 0.28820(18) 0.0432(16) Uani 1 1 d . . . 
H173 H 0.4082 0.5082 0.2731 0.052 Uiso 1 1 calc R . . 
C174 C 0.3755(3) 0.5678(2) 0.27719(18) 0.0431(16) Uani 1 1 d . . . 
H174 H 0.3431 0.5813 0.2548 0.052 Uiso 1 1 calc R . . 
C175 C 0.3835(4) 0.5921(2) 0.29846(19) 0.0423(16) Uani 1 1 d . . . 
C176 C 0.4323(4) 0.5711(2) 0.3307(2) 0.0555(19) Uani 1 1 d . . . 
H176 H 0.4403 0.5872 0.3452 0.067 Uiso 1 1 calc R . . 
C177 C 0.4692(4) 0.5277(2) 0.34217(19) 0.0485(17) Uani 1 1 d . . . 
H177 H 0.5006 0.5141 0.3650 0.058 Uiso 1 1 calc R . . 
C178 C 0.3386(4) 0.6376(2) 0.2896(2) 0.0503(18) Uani 1 1 d . . . 
H178 H 0.3508 0.6535 0.3034 0.060 Uiso 1 1 calc R . . 
C179 C 0.5284(3) 0.43332(19) 0.37141(17) 0.0371(15) Uani 1 1 d . . . 
C180 C 0.4817(3) 0.4270(2) 0.40199(18) 0.0422(16) Uani 1 1 d . . . 
H180 H 0.4302 0.4412 0.3973 0.051 Uiso 1 1 calc R . . 
C181 C 0.5092(4) 0.4007(2) 0.43882(18) 0.0433(16) Uani 1 1 d . . . 
H181 H 0.4763 0.3965 0.4592 0.052 Uiso 1 1 calc R . . 
C182 C 0.5843(3) 0.37999(19) 0.44676(17) 0.0361(15) Uani 1 1 d . . . 
C183 C 0.6307(3) 0.3876(2) 0.41626(18) 0.0426(16) Uani 1 1 d . . . 
H183 H 0.6825 0.3744 0.4211 0.051 Uiso 1 1 calc R . . 
C184 C 0.6036(4) 0.4139(2) 0.37899(18) 0.0439(16) Uani 1 1 d . . . 
H184 H 0.6366 0.4187 0.3587 0.053 Uiso 1 1 calc R . . 
C185 C 0.6157(4) 0.3478(2) 0.48486(19) 0.0428(16) Uani 1 1 d . . . 
H185 H 0.6678 0.3351 0.4878 0.051 Uiso 1 1 calc R . . 
C186 C 0.5244(3) 0.4414(2) 0.30367(17) 0.0388(15) Uani 1 1 d . . . 
C187 C 0.5031(3) 0.40496(19) 0.30451(17) 0.0405(16) Uani 1 1 d . . . 
H187 H 0.4753 0.3905 0.3249 0.049 Uiso 1 1 calc R . . 
C188 C 0.5231(3) 0.3899(2) 0.27514(17) 0.0414(16) Uani 1 1 d . . . 
H188 H 0.5090 0.3648 0.2756 0.050 Uiso 1 1 calc R . . 
C189 C 0.5635(3) 0.41106(19) 0.24499(16) 0.0377(15) Uani 1 1 d . . . 
C190 C 0.5876(4) 0.4464(2) 0.24606(17) 0.0456(17) Uani 1 1 d . . . 
H190 H 0.6179 0.4601 0.2267 0.055 Uiso 1 1 calc R . . 
C191 C 0.5672(4) 0.4611(2) 0.27512(18) 0.0453(17) Uani 1 1 d . . . 
H191 H 0.5830 0.4854 0.2755 0.054 Uiso 1 1 calc R . . 
C192 C 0.5758(4) 0.3994(2) 0.21097(17) 0.0427(16) Uani 1 1 d . . . 
H192 H 0.6125 0.4094 0.1939 0.051 Uiso 1 1 calc R . . 
C193 C 0.7102(4) 0.3261(2) 0.14673(18) 0.0493(18) Uani 1 1 d . . . 
H19A H 0.6757 0.3492 0.1256 0.059 Uiso 1 1 calc R . . 
H19B H 0.7278 0.3002 0.1397 0.059 Uiso 1 1 calc R . . 
C194 C 0.7752(4) 0.3426(2) 0.15116(19) 0.0481(17) Uani 1 1 d . . . 
H19C H 0.8026 0.3233 0.1761 0.058 Uiso 1 1 calc R . . 
H19D H 0.8093 0.3416 0.1304 0.058 Uiso 1 1 calc R . . 
C195 C 0.7024(4) 0.2682(2) 0.20825(17) 0.0465(17) Uani 1 1 d . . . 
H19E H 0.7564 0.2603 0.2048 0.056 Uiso 1 1 calc R . . 
H19F H 0.6798 0.2484 0.2014 0.056 Uiso 1 1 calc R . . 
C196 C 0.6897(4) 0.2613(2) 0.25011(18) 0.0459(17) Uani 1 1 d . . . 
H19G H 0.6364 0.2728 0.2531 0.055 Uiso 1 1 calc R . . 
H19H H 0.7039 0.2295 0.2662 0.055 Uiso 1 1 calc R . . 
C197 C 0.5894(4) 0.3224(2) 0.17458(19) 0.0520(18) Uani 1 1 d . . . 
H19I H 0.5681 0.3029 0.1969 0.062 Uiso 1 1 calc R . . 
H19J H 0.5807 0.3158 0.1519 0.062 Uiso 1 1 calc R . . 
C198 C 0.5510(4) 0.3701(2) 0.16704(18) 0.0514(18) Uani 1 1 d . . . 
H19K H 0.5821 0.3893 0.1511 0.062 Uiso 1 1 calc R . . 
H19L H 0.5026 0.3785 0.1528 0.062 Uiso 1 1 calc R . . 
C199 C 0.7300(3) 0.3279(2) 0.59394(17) 0.0419(16) Uani 1 1 d . . . 
H19M H 0.7430 0.2983 0.5929 0.050 Uiso 1 1 calc R . . 
H19N H 0.7304 0.3241 0.6213 0.050 Uiso 1 1 calc R . . 
C200 C 0.7875(3) 0.3521(2) 0.57403(17) 0.0431(16) Uani 1 1 d . . . 
H20A H 0.7685 0.3837 0.5689 0.052 Uiso 1 1 calc R . . 
H20B H 0.8335 0.3407 0.5908 0.052 Uiso 1 1 calc R . . 
C201 C 0.6212(4) 0.3844(2) 0.59209(18) 0.0490(18) Uani 1 1 d . . . 
H20C H 0.6607 0.3953 0.5991 0.059 Uiso 1 1 calc R . . 
H20D H 0.5969 0.3704 0.6159 0.059 Uiso 1 1 calc R . . 
C202 C 0.5641(4) 0.4231(2) 0.56439(18) 0.0508(18) Uani 1 1 d . . . 
H20E H 0.5315 0.4123 0.5522 0.061 Uiso 1 1 calc R . . 
H20F H 0.5328 0.4395 0.5786 0.061 Uiso 1 1 calc R . . 
C203 C 0.6078(4) 0.3210(2) 0.58130(18) 0.0482(17) Uani 1 1 d . . . 
H20G H 0.5552 0.3365 0.5814 0.058 Uiso 1 1 calc R . . 
H20H H 0.6213 0.2962 0.6065 0.058 Uiso 1 1 calc R . . 
C204 C 0.6159(4) 0.3032(2) 0.54983(18) 0.0510(18) Uani 1 1 d . . . 
H20I H 0.6693 0.2937 0.5457 0.061 Uiso 1 1 calc R . . 
H20J H 0.5952 0.2772 0.5578 0.061 Uiso 1 1 calc R . . 
C205 C 1.1451(4) 0.5986(2) 0.24257(18) 0.0473(17) Uani 1 1 d . . . 
H20K H 1.1591 0.5837 0.2243 0.057 Uiso 1 1 calc R . . 
H20L H 1.1823 0.6151 0.2419 0.057 Uiso 1 1 calc R . . 
C206 C 1.0689(4) 0.6303(2) 0.23015(19) 0.0531(18) Uani 1 1 d . . . 
H20M H 1.0491 0.6391 0.2516 0.064 Uiso 1 1 calc R . . 
H20N H 1.0736 0.6571 0.2082 0.064 Uiso 1 1 calc R . . 
C207 C 1.1578(3) 0.5815(2) 0.31087(17) 0.0414(16) Uani 1 1 d . . . 
H20O H 1.1344 0.6134 0.3018 0.050 Uiso 1 1 calc R . . 
H20P H 1.2119 0.5770 0.3152 0.050 Uiso 1 1 calc R . . 
C208 C 1.1256(3) 0.5580(2) 0.34869(18) 0.0450(16) Uani 1 1 d . . . 
H20Q H 1.1396 0.5260 0.3547 0.054 Uiso 1 1 calc R . . 
H20R H 1.1471 0.5630 0.3697 0.054 Uiso 1 1 calc R . . 
C209 C 1.2005(4) 0.5242(2) 0.28616(19) 0.0470(17) Uani 1 1 d . . . 
H20S H 1.2141 0.5069 0.3138 0.056 Uiso 1 1 calc R . . 
H20T H 1.2460 0.5307 0.2732 0.056 Uiso 1 1 calc R . . 
C210 C 1.1703(4) 0.4971(2) 0.26936(18) 0.0463(17) Uani 1 1 d . . . 
H21A H 1.1434 0.5166 0.2443 0.056 Uiso 1 1 calc R . . 
H21B H 1.2122 0.4754 0.2647 0.056 Uiso 1 1 calc R . . 
C211 C 0.3065(5) 0.7631(3) 0.1667(2) 0.079(3) Uani 1 1 d . . . 
H21C H 0.3434 0.7809 0.1588 0.095 Uiso 1 1 calc R . . 
H21D H 0.2570 0.7828 0.1561 0.095 Uiso 1 1 calc R . . 
C212 C 0.3246(5) 0.7285(3) 0.1500(3) 0.085(3) Uani 1 1 d . . . 
H21E H 0.2988 0.7054 0.1639 0.103 Uiso 1 1 calc R . . 
H21F H 0.3063 0.7417 0.1227 0.103 Uiso 1 1 calc R . . 
C213 C 0.3185(4) 0.7769(2) 0.2234(2) 0.0570(19) Uani 1 1 d . . . 
H21G H 0.2989 0.7709 0.2493 0.068 Uiso 1 1 calc R . . 
H21H H 0.2910 0.8067 0.2063 0.068 Uiso 1 1 calc R . . 
C214 C 0.3996(4) 0.7752(2) 0.2256(2) 0.063(2) Uani 1 1 d . . . 
H21I H 0.4224 0.7723 0.2021 0.075 Uiso 1 1 calc R . . 
H21J H 0.4052 0.8029 0.2265 0.075 Uiso 1 1 calc R . . 
C215 C 0.2370(4) 0.7332(2) 0.2217(3) 0.069(2) Uani 1 1 d . . . 
H21K H 0.2199 0.7214 0.2043 0.083 Uiso 1 1 calc R . . 
H21L H 0.1989 0.7601 0.2199 0.083 Uiso 1 1 calc R . . 
C216 C 0.2428(4) 0.6999(2) 0.2623(2) 0.069(2) Uani 1 1 d . . . 
H21M H 0.2676 0.7091 0.2794 0.083 Uiso 1 1 calc R . . 
H21N H 0.1923 0.6985 0.2712 0.083 Uiso 1 1 calc R . . 
N41 N 1.0130(3) 0.72593(16) 0.32301(14) 0.0431(13) Uani 1 1 d . . . 
N42 N 0.8218(4) 0.89842(18) 0.29061(16) 0.0601(17) Uani 1 1 d . . . 
N43 N 0.6530(3) 0.78400(16) 0.36735(15) 0.0444(13) Uani 1 1 d . . . 
N44 N 0.9406(3) 0.83178(16) 0.46373(14) 0.0439(13) Uani 1 1 d . . . 
N45 N 1.3066(3) 0.88615(17) 0.32189(16) 0.0555(15) Uani 1 1 d . . . 
N46 N 0.5156(3) 1.02529(15) 0.42055(14) 0.0402(13) Uani 1 1 d . . . 
N47 N 0.9206(3) 0.55140(15) 0.54617(14) 0.0396(13) Uani 1 1 d . . . 
N48 N 0.6837(3) 0.78428(19) 0.13880(16) 0.0574(16) Uani 1 1 d . . . 
N49 N 1.2691(4) 0.8325(2) 0.28260(16) 0.0597(16) Uani 1 1 d . . . 
N50 N 1.2732(3) 0.83969(18) 0.40725(16) 0.0520(15) Uani 1 1 d . . . 
N51 N 1.1417(4) 0.9381(2) 0.3022(2) 0.0727(19) Uani 1 1 d . . . 
N52 N 0.6770(3) 1.00142(17) 0.45309(16) 0.0496(14) Uani 1 1 d . . . 
N53 N 0.5596(3) 1.02746(18) 0.34263(15) 0.0510(14) Uani 1 1 d . . . 
N54 N 0.4973(3) 0.93025(16) 0.43748(14) 0.0428(13) Uani 1 1 d . . . 
N55 N 1.0464(3) 0.57769(18) 0.49477(14) 0.0429(13) Uani 1 1 d . . . 
N56 N 0.8824(3) 0.64035(17) 0.55736(15) 0.0433(13) Uani 1 1 d . . . 
N57 N 0.8043(3) 0.58283(17) 0.47841(15) 0.0438(13) Uani 1 1 d . . . 
N58 N 0.5746(3) 0.7929(2) 0.19839(16) 0.0633(17) Uani 1 1 d . . . 
N59 N 0.7518(4) 0.8589(2) 0.1409(2) 0.0633(17) Uani 1 1 d . . . 
N60 N 0.8125(3) 0.71215(17) 0.19419(17) 0.0520(15) Uani 1 1 d . . . 
C217 C 1.0606(4) 0.7542(2) 0.30921(18) 0.0440(17) Uani 1 1 d . . . 
C218 C 1.1261(4) 0.74610(19) 0.33005(18) 0.0427(16) Uani 1 1 d . . . 
H218 H 1.1393 0.7207 0.3530 0.051 Uiso 1 1 calc R . . 
C219 C 1.1725(4) 0.7741(2) 0.31812(19) 0.0494(17) Uani 1 1 d . . . 
H219 H 1.2167 0.7681 0.3330 0.059 Uiso 1 1 calc R . . 
C220 C 1.1540(4) 0.8117(2) 0.28394(19) 0.0470(17) Uani 1 1 d . . . 
C221 C 1.0899(4) 0.8192(2) 0.2629(2) 0.0541(19) Uani 1 1 d . . . 
H221 H 1.0773 0.8444 0.2397 0.065 Uiso 1 1 calc R . . 
C222 C 1.0430(4) 0.7911(2) 0.27437(19) 0.0511(18) Uani 1 1 d . . . 
H222 H 0.9997 0.7967 0.2590 0.061 Uiso 1 1 calc R . . 
C223 C 1.2026(5) 0.8419(2) 0.27046(19) 0.0521(18) Uani 1 1 d . . . 
H223 H 1.1826 0.8703 0.2514 0.062 Uiso 1 1 calc R . . 
C224 C 0.9612(4) 0.72236(18) 0.29862(18) 0.0417(16) Uani 1 1 d . . . 
C225 C 0.9800(4) 0.72089(19) 0.26276(18) 0.0438(17) Uani 1 1 d . . . 
H225 H 1.0287 0.7219 0.2544 0.053 Uiso 1 1 calc R . . 
C226 C 0.9280(4) 0.71792(19) 0.23930(18) 0.0449(17) Uani 1 1 d . . . 
H226 H 0.9410 0.7176 0.2147 0.054 Uiso 1 1 calc R . . 
C227 C 0.8566(4) 0.71541(19) 0.25146(18) 0.0447(17) Uani 1 1 d . . . 
C228 C 0.8396(4) 0.7163(2) 0.28717(18) 0.0455(17) Uani 1 1 d . . . 
H228 H 0.7913 0.7145 0.2958 0.055 Uiso 1 1 calc R . . 
C229 C 0.8902(4) 0.71970(19) 0.31066(18) 0.0416(16) Uani 1 1 d . . . 
H229 H 0.8767 0.7202 0.3351 0.050 Uiso 1 1 calc R . . 
C230 C 0.8001(4) 0.7118(2) 0.2275(2) 0.0472(17) Uani 1 1 d . . . 
H230 H 0.7530 0.7091 0.2375 0.057 Uiso 1 1 calc R . . 
C231 C 1.0152(3) 0.70017(19) 0.36320(17) 0.0398(16) Uani 1 1 d . . . 
C232 C 1.0237(3) 0.6550(2) 0.37503(18) 0.0424(16) Uani 1 1 d . . . 
H232 H 1.0266 0.6422 0.3564 0.051 Uiso 1 1 calc R . . 
C233 C 1.0277(3) 0.6291(2) 0.41322(17) 0.0398(16) Uani 1 1 d . . . 
H233 H 1.0343 0.5984 0.4209 0.048 Uiso 1 1 calc R . . 
C234 C 1.0222(3) 0.6470(2) 0.44114(18) 0.0398(16) Uani 1 1 d . . . 
C235 C 1.0120(3) 0.6922(2) 0.42922(18) 0.0429(16) Uani 1 1 d . . . 
H235 H 1.0078 0.7050 0.4478 0.051 Uiso 1 1 calc R . . 
C236 C 1.0080(3) 0.7187(2) 0.39036(18) 0.0444(17) Uani 1 1 d . . . 
H236 H 1.0002 0.7495 0.3825 0.053 Uiso 1 1 calc R . . 
C237 C 1.0291(3) 0.6192(2) 0.48268(18) 0.0423(16) Uani 1 1 d . . . 
H237 H 1.0203 0.6328 0.5008 0.051 Uiso 1 1 calc R . . 
C238 C 0.7600(4) 0.9194(2) 0.30617(19) 0.058(2) Uani 1 1 d . . . 
C239 C 0.7668(4) 0.9505(2) 0.32079(18) 0.0541(19) Uani 1 1 d . . . 
H239 H 0.8138 0.9559 0.3228 0.065 Uiso 1 1 calc R . . 
C240 C 0.7033(4) 0.9733(2) 0.33242(19) 0.058(2) Uani 1 1 d . . . 
H240 H 0.7077 0.9947 0.3420 0.069 Uiso 1 1 calc R . . 
C241 C 0.6346(4) 0.9658(2) 0.33041(19) 0.0523(19) Uani 1 1 d . . . 
C242 C 0.6307(5) 0.9322(2) 0.3184(2) 0.069(2) Uani 1 1 d . . . 
H242 H 0.5849 0.9245 0.3188 0.083 Uiso 1 1 calc R . . 
C243 C 0.6929(5) 0.9100(2) 0.3061(2) 0.072(2) Uani 1 1 d . . . 
H243 H 0.6889 0.8878 0.2973 0.087 Uiso 1 1 calc R . . 
C244 C 0.5657(4) 0.9909(2) 0.34009(19) 0.058(2) Uani 1 1 d . . . 
H244 H 0.5236 0.9790 0.3447 0.070 Uiso 1 1 calc R . . 
C245 C 0.8091(4) 0.8839(2) 0.2614(2) 0.0565(19) Uani 1 1 d . . . 
C246 C 0.7602(4) 0.9099(2) 0.2300(2) 0.066(2) Uani 1 1 d . . . 
H246 H 0.7330 0.9383 0.2281 0.079 Uiso 1 1 calc R . . 
C247 C 0.7499(4) 0.8956(2) 0.2014(2) 0.065(2) Uani 1 1 d . . . 
H247 H 0.7152 0.9138 0.1803 0.078 Uiso 1 1 calc R . . 
C248 C 0.7911(4) 0.8539(2) 0.2034(2) 0.0566(19) Uani 1 1 d . . . 
C249 C 0.8400(4) 0.8282(2) 0.2346(2) 0.066(2) Uani 1 1 d . . . 
H249 H 0.8685 0.8002 0.2364 0.079 Uiso 1 1 calc R . . 
C250 C 0.8483(4) 0.8427(2) 0.2638(2) 0.064(2) Uani 1 1 d . . . 
H250 H 0.8812 0.8240 0.2855 0.076 Uiso 1 1 calc R . . 
C251 C 0.7878(4) 0.8377(2) 0.1725(2) 0.062(2) Uani 1 1 d . . . 
H251 H 0.8155 0.8085 0.1770 0.074 Uiso 1 1 calc R . . 
C252 C 0.8960(5) 0.8972(2) 0.3000(2) 0.061(2) Uani 1 1 d . . . 
C253 C 0.9436(5) 0.9105(2) 0.2707(2) 0.060(2) Uani 1 1 d . . . 
H253 H 0.9288 0.9166 0.2449 0.072 Uiso 1 1 calc R . . 
C254 C 1.0121(5) 0.9150(2) 0.2786(2) 0.059(2) Uani 1 1 d . . . 
H254 H 1.0428 0.9252 0.2581 0.071 Uiso 1 1 calc R . . 
C255 C 1.0372(5) 0.9048(2) 0.3160(2) 0.060(2) Uani 1 1 d . . . 
C256 C 0.9924(5) 0.8880(3) 0.3445(2) 0.080(3) Uani 1 1 d . . . 
H256 H 1.0100 0.8786 0.3704 0.096 Uiso 1 1 calc R . . 
C257 C 0.9224(5) 0.8837(3) 0.3376(2) 0.077(3) Uani 1 1 d . . . 
H257 H 0.8933 0.8717 0.3584 0.093 Uiso 1 1 calc R . . 
C258 C 1.1040(5) 0.9150(3) 0.3262(2) 0.066(2) Uani 1 1 d . . . 
H258 H 1.1199 0.9034 0.3526 0.079 Uiso 1 1 calc R . . 
C259 C 0.6295(4) 0.7926(2) 0.32979(19) 0.0455(17) Uani 1 1 d . . . 
C260 C 0.6421(4) 0.7588(2) 0.31623(19) 0.0488(17) Uani 1 1 d . . . 
H260 H 0.6642 0.7295 0.3330 0.059 Uiso 1 1 calc R . . 
C261 C 0.6226(4) 0.7680(2) 0.2785(2) 0.0510(18) Uani 1 1 d . . . 
H261 H 0.6316 0.7445 0.2697 0.061 Uiso 1 1 calc R . . 
C262 C 0.5902(4) 0.8103(2) 0.2529(2) 0.0578(19) Uani 1 1 d . . . 
C263 C 0.5763(4) 0.8434(2) 0.2668(2) 0.063(2) Uani 1 1 d . . . 
H263 H 0.5544 0.8727 0.2499 0.076 Uiso 1 1 calc R . . 
C264 C 0.5936(4) 0.8349(2) 0.30462(19) 0.0510(18) Uani 1 1 d . . . 
H264 H 0.5808 0.8581 0.3137 0.061 Uiso 1 1 calc R . . 
C265 C 0.5715(4) 0.8216(3) 0.2123(2) 0.063(2) Uani 1 1 d . . . 
H265 H 0.5566 0.8517 0.1958 0.075 Uiso 1 1 calc R . . 
C266 C 0.6297(4) 0.81542(19) 0.38493(17) 0.0386(15) Uani 1 1 d . . . 
C267 C 0.5553(4) 0.8343(2) 0.38617(17) 0.0420(16) Uani 1 1 d . . . 
H267 H 0.5188 0.8260 0.3757 0.050 Uiso 1 1 calc R . . 
C268 C 0.5334(4) 0.86543(19) 0.40260(17) 0.0426(16) Uani 1 1 d . . . 
H268 H 0.4821 0.8791 0.4023 0.051 Uiso 1 1 calc R . . 
C269 C 0.5852(4) 0.87664(19) 0.41924(17) 0.0378(15) Uani 1 1 d . . . 
C270 C 0.6596(4) 0.8568(2) 0.41902(19) 0.0514(18) Uani 1 1 d . . . 
H270 H 0.6959 0.8640 0.4307 0.062 Uiso 1 1 calc R . . 
C271 C 0.6817(4) 0.8265(2) 0.40197(19) 0.0517(18) Uani 1 1 d . . . 
H271 H 0.7331 0.8132 0.4019 0.062 Uiso 1 1 calc R . . 
C272 C 0.5628(4) 0.9077(2) 0.43881(18) 0.0464(17) Uani 1 1 d . . . 
H272 H 0.5999 0.9108 0.4533 0.056 Uiso 1 1 calc R . . 
C273 C 0.6984(4) 0.7416(2) 0.39066(18) 0.0461(17) Uani 1 1 d . . . 
C274 C 0.6646(4) 0.7083(2) 0.41254(18) 0.0482(17) Uani 1 1 d . . . 
H274 H 0.6119 0.7143 0.4128 0.058 Uiso 1 1 calc R . . 
C275 C 0.7075(4) 0.6668(2) 0.43379(18) 0.0483(17) Uani 1 1 d . . . 
H275 H 0.6839 0.6445 0.4487 0.058 Uiso 1 1 calc R . . 
C276 C 0.7838(4) 0.6571(2) 0.43368(18) 0.0428(16) Uani 1 1 d . . . 
C277 C 0.8171(4) 0.6904(2) 0.41137(19) 0.0488(17) Uani 1 1 d . . . 
H277 H 0.8697 0.6842 0.4109 0.059 Uiso 1 1 calc R . . 
C278 C 0.7745(4) 0.7322(2) 0.38978(19) 0.0481(17) Uani 1 1 d . . . 
H278 H 0.7980 0.7543 0.3744 0.058 Uiso 1 1 calc R . . 
C279 C 0.8310(4) 0.6129(2) 0.45491(18) 0.0448(16) Uani 1 1 d . . . 
H279 H 0.8828 0.6068 0.4509 0.054 Uiso 1 1 calc R . . 
C280 C 0.9173(4) 0.7917(2) 0.47976(18) 0.0427(16) Uani 1 1 d . . . 
C281 C 0.9600(4) 0.7565(2) 0.50962(18) 0.0437(16) Uani 1 1 d . . . 
H281 H 1.0035 0.7592 0.5197 0.052 Uiso 1 1 calc R . . 
C282 C 0.9388(4) 0.7171(2) 0.52480(18) 0.0464(17) Uani 1 1 d . . . 
H282 H 0.9689 0.6926 0.5448 0.056 Uiso 1 1 calc R . . 
C283 C 0.8738(4) 0.7135(2) 0.51083(18) 0.0397(16) Uani 1 1 d . . . 
C284 C 0.8323(4) 0.7483(2) 0.48068(18) 0.0444(16) Uani 1 1 d . . . 
H284 H 0.7889 0.7457 0.4704 0.053 Uiso 1 1 calc R . . 
C285 C 0.8541(4) 0.7876(2) 0.46519(18) 0.0465(17) Uani 1 1 d . . . 
H285 H 0.8252 0.8117 0.4444 0.056 Uiso 1 1 calc R . . 
C286 C 0.8481(4) 0.6732(2) 0.52839(19) 0.0442(16) Uani 1 1 d . . . 
H286 H 0.8043 0.6715 0.5177 0.053 Uiso 1 1 calc R . . 
C287 C 0.8858(4) 0.8728(2) 0.45422(18) 0.0436(16) Uani 1 1 d . . . 
C288 C 0.8259(4) 0.8755(2) 0.47749(18) 0.0429(16) Uani 1 1 d . . . 
H288 H 0.8216 0.8504 0.4992 0.051 Uiso 1 1 calc R . . 
C289 C 0.7729(4) 0.9146(2) 0.46903(19) 0.0488(17) Uani 1 1 d . . . 
H289 H 0.7326 0.9162 0.4853 0.059 Uiso 1 1 calc R . . 
C290 C 0.7773(4) 0.9521(2) 0.43682(19) 0.0466(17) Uani 1 1 d . . . 
C291 C 0.8370(4) 0.9480(2) 0.41456(19) 0.0507(18) Uani 1 1 d . . . 
H291 H 0.8408 0.9728 0.3924 0.061 Uiso 1 1 calc R . . 
C292 C 0.8918(4) 0.9093(2) 0.42295(19) 0.0530(18) Uani 1 1 d . . . 
H292 H 0.9331 0.9081 0.4073 0.064 Uiso 1 1 calc R . . 
C293 C 0.7201(4) 0.9943(2) 0.42823(19) 0.0466(17) Uani 1 1 d . . . 
H293 H 0.7159 1.0166 0.4032 0.056 Uiso 1 1 calc R . . 
C294 C 1.0127(4) 0.8288(2) 0.44939(17) 0.0430(16) Uani 1 1 d . . . 
C295 C 1.0558(4) 0.8568(2) 0.45088(17) 0.0451(17) Uani 1 1 d . . . 
H295 H 1.0371 0.8779 0.4620 0.054 Uiso 1 1 calc R . . 
C296 C 1.1251(4) 0.8535(2) 0.43630(17) 0.0447(16) Uani 1 1 d . . . 
H296 H 1.1533 0.8729 0.4369 0.054 Uiso 1 1 calc R . . 
C297 C 1.1548(4) 0.8221(2) 0.42062(18) 0.0487(17) Uani 1 1 d . . . 
C298 C 1.1115(4) 0.7947(2) 0.41953(19) 0.0521(18) Uani 1 1 d . . . 
H298 H 1.1304 0.7734 0.4087 0.063 Uiso 1 1 calc R . . 
C299 C 1.0425(4) 0.7977(2) 0.43373(18) 0.0514(18) Uani 1 1 d . . . 
H299 H 1.0144 0.7783 0.4329 0.062 Uiso 1 1 calc R . . 
C300 C 1.2293(4) 0.8182(2) 0.40486(18) 0.0500(18) Uani 1 1 d . . . 
H300 H 1.2448 0.7984 0.3922 0.060 Uiso 1 1 calc R . . 
C301 C 1.3550(4) 0.8690(3) 0.2966(2) 0.062(2) Uani 1 1 d . . . 
H30A H 1.3864 0.8395 0.3121 0.075 Uiso 1 1 calc R . . 
H30B H 1.3884 0.8885 0.2846 0.075 Uiso 1 1 calc R . . 
C302 C 1.3115(5) 0.8659(3) 0.2655(2) 0.072(2) Uani 1 1 d . . . 
H30C H 1.2769 0.8948 0.2512 0.087 Uiso 1 1 calc R . . 
H30D H 1.3458 0.8579 0.2471 0.087 Uiso 1 1 calc R . . 
C303 C 1.2752(5) 0.9333(2) 0.3022(2) 0.079(2) Uani 1 1 d . . . 
H30E H 1.2676 0.9404 0.2744 0.095 Uiso 1 1 calc R . . 
H30F H 1.3107 0.9493 0.3053 0.095 Uiso 1 1 calc R . . 
C304 C 1.2021(5) 0.9483(3) 0.3179(3) 0.087(3) Uani 1 1 d . . . 
H30G H 1.2056 0.9336 0.3463 0.104 Uiso 1 1 calc R . . 
H30H H 1.1911 0.9804 0.3112 0.104 Uiso 1 1 calc R . . 
C305 C 1.3487(4) 0.8770(2) 0.3576(2) 0.060(2) Uani 1 1 d . . . 
H30I H 1.3289 0.9011 0.3667 0.071 Uiso 1 1 calc R . . 
H30J H 1.4014 0.8762 0.3521 0.071 Uiso 1 1 calc R . . 
C306 C 1.3443(4) 0.8340(2) 0.38899(19) 0.0514(18) Uani 1 1 d . . . 
H30K H 1.3487 0.8115 0.3780 0.062 Uiso 1 1 calc R . . 
H30L H 1.3858 0.8240 0.4084 0.062 Uiso 1 1 calc R . . 
C307 C 0.4910(4) 1.0633(2) 0.38398(18) 0.0487(17) Uani 1 1 d . . . 
H30M H 0.5268 1.0818 0.3782 0.058 Uiso 1 1 calc R . . 
H30N H 0.4420 1.0813 0.3869 0.058 Uiso 1 1 calc R . . 
C308 C 0.4850(4) 1.0495(2) 0.35084(19) 0.0565(19) Uani 1 1 d . . . 
H30O H 0.4523 1.0291 0.3573 0.068 Uiso 1 1 calc R . . 
H30P H 0.4626 1.0756 0.3277 0.068 Uiso 1 1 calc R . . 
C309 C 0.4539(4) 1.00544(19) 0.43654(19) 0.0459(17) Uani 1 1 d . . . 
H30Q H 0.4202 1.0092 0.4153 0.055 Uiso 1 1 calc R . . 
H30R H 0.4252 1.0207 0.4524 0.055 Uiso 1 1 calc R . . 
C310 C 0.4822(4) 0.9565(2) 0.46127(18) 0.0468(17) Uani 1 1 d . . . 
H31A H 0.5283 0.9517 0.4761 0.056 Uiso 1 1 calc R . . 
H31B H 0.4446 0.9469 0.4798 0.056 Uiso 1 1 calc R . . 
C311 C 0.5450(3) 1.0387(2) 0.44815(19) 0.0462(17) Uani 1 1 d . . . 
H31C H 0.5444 1.0165 0.4743 0.055 Uiso 1 1 calc R . . 
H31D H 0.5117 1.0669 0.4472 0.055 Uiso 1 1 calc R . . 
C312 C 0.6230(4) 1.0443(2) 0.4413(2) 0.0505(18) Uani 1 1 d . . . 
H31E H 0.6270 1.0614 0.4137 0.061 Uiso 1 1 calc R . . 
H31F H 0.6342 1.0609 0.4561 0.061 Uiso 1 1 calc R . . 
C313 C 0.9059(4) 0.5606(2) 0.58100(17) 0.0443(16) Uani 1 1 d . . . 
H31G H 0.9528 0.5616 0.5916 0.053 Uiso 1 1 calc R . . 
H31H H 0.8882 0.5363 0.6004 0.053 Uiso 1 1 calc R . . 
C314 C 0.8482(4) 0.6037(2) 0.57401(18) 0.0461(17) Uani 1 1 d . . . 
H31I H 0.8073 0.6071 0.5563 0.055 Uiso 1 1 calc R . . 
H31J H 0.8269 0.6036 0.5986 0.055 Uiso 1 1 calc R . . 
C315 C 0.8673(4) 0.5293(2) 0.53980(18) 0.0461(17) Uani 1 1 d . . . 
H31K H 0.8193 0.5389 0.5502 0.055 Uiso 1 1 calc R . . 
H31L H 0.8859 0.4972 0.5537 0.055 Uiso 1 1 calc R . . 
C316 C 0.8551(4) 0.5393(2) 0.49733(19) 0.0495(17) Uani 1 1 d . . . 
H31M H 0.9034 0.5385 0.4850 0.059 Uiso 1 1 calc R . . 
H31N H 0.8341 0.5168 0.4943 0.059 Uiso 1 1 calc R . . 
C317 C 0.9966(3) 0.5259(2) 0.54731(18) 0.0438(16) Uani 1 1 d . . . 
H31O H 0.9990 0.5104 0.5296 0.053 Uiso 1 1 calc R . . 
H31P H 1.0104 0.5034 0.5736 0.053 Uiso 1 1 calc R . . 
C318 C 1.0522(3) 0.5534(2) 0.53626(17) 0.0431(16) Uani 1 1 d . . . 
H31Q H 1.0426 0.5742 0.5495 0.052 Uiso 1 1 calc R . . 
H31R H 1.1031 0.5342 0.5443 0.052 Uiso 1 1 calc R . . 
C319 C 0.7330(4) 0.7453(2) 0.1354(2) 0.064(2) Uani 1 1 d . . . 
H31S H 0.7792 0.7525 0.1238 0.076 Uiso 1 1 calc R . . 
H31T H 0.7085 0.7364 0.1180 0.076 Uiso 1 1 calc R . . 
C320 C 0.7524(4) 0.7076(2) 0.17368(19) 0.059(2) Uani 1 1 d . . . 
H32A H 0.7081 0.7068 0.1893 0.070 Uiso 1 1 calc R . . 
H32B H 0.7679 0.6796 0.1697 0.070 Uiso 1 1 calc R . . 
C321 C 0.6898(4) 0.8251(2) 0.1072(2) 0.063(2) Uani 1 1 d . . . 
H32C H 0.6458 0.8491 0.1060 0.075 Uiso 1 1 calc R . . 
H32D H 0.6906 0.8211 0.0825 0.075 Uiso 1 1 calc R . . 
C322 C 0.7599(4) 0.8379(3) 0.1127(2) 0.068(2) Uani 1 1 d . . . 
H32E H 0.8019 0.8113 0.1215 0.081 Uiso 1 1 calc R . . 
H32F H 0.7719 0.8583 0.0877 0.081 Uiso 1 1 calc R . . 
C323 C 0.6061(4) 0.7807(3) 0.1393(2) 0.064(2) Uani 1 1 d . . . 
H32G H 0.6055 0.7497 0.1537 0.077 Uiso 1 1 calc R . . 
H32H H 0.5874 0.7891 0.1126 0.077 Uiso 1 1 calc R . . 
C324 C 0.5538(4) 0.8090(3) 0.1573(2) 0.072(2) Uani 1 1 d . . . 
H32I H 0.5566 0.8398 0.1445 0.086 Uiso 1 1 calc R . . 
H32J H 0.5020 0.8078 0.1538 0.086 Uiso 1 1 calc R . . 
N61 N 0.1030(3) 0.69478(17) -0.06502(14) 0.0472(14) Uani 1 1 d . . . 
N62 N 0.0495(3) 0.69639(16) 0.12315(14) 0.0448(14) Uani 1 1 d . . . 
N63 N 0.2804(3) 0.8124(2) -0.00373(19) 0.0670(17) Uani 1 1 d . . . 
N64 N -0.1152(3) 0.86884(19) -0.03749(15) 0.0539(15) Uani 1 1 d . . . 
N65 N -0.3361(4) 0.6567(3) 0.0188(3) 0.101(3) Uani 1 1 d . . . 
N66 N 0.4676(3) 0.52240(19) 0.10255(17) 0.0611(16) Uani 1 1 d . . . 
N67 N 0.1167(6) 0.9426(2) -0.2476(2) 0.101(3) Uani 1 1 d . . . 
N68 N 0.0356(4) 0.94762(18) 0.13772(16) 0.0644(17) Uani 1 1 d . . . 
N69 N -0.2247(4) 0.6581(3) -0.0449(2) 0.110(3) Uani 1 1 d . . . 
N70 N -0.3559(6) 0.7514(3) 0.0082(4) 0.172(6) Uani 1 1 d . . . 
N71 N -0.2089(4) 0.6229(2) 0.08220(17) 0.0653(17) Uani 1 1 d . . . 
N72 N 0.3335(3) 0.5287(2) 0.05483(18) 0.0629(16) Uani 1 1 d . . . 
N73 N 0.4751(5) 0.6158(2) 0.0473(2) 0.087(2) Uani 1 1 d . . . 
N74 N 0.3745(3) 0.5584(2) 0.15802(17) 0.0661(17) Uani 1 1 d . . . 
N75 N -0.0384(5) 0.9353(2) -0.21551(18) 0.089(2) Uani 1 1 d . . . 
N76 N 0.1838(5) 0.8443(2) -0.2152(2) 0.086(2) Uani 1 1 d . . . 
N77 N 0.1811(5) 0.9514(2) -0.1767(2) 0.104(3) Uani 1 1 d . . . 
N78 N -0.0276(3) 0.86780(17) 0.16616(17) 0.0559(15) Uani 1 1 d . . . 
N79 N 0.1903(4) 0.8921(2) 0.12592(19) 0.077(2) Uani 1 1 d . . . 
N80 N -0.0287(4) 0.9778(2) 0.05469(17) 0.081(2) Uani 1 1 d . . . 
C325 C 0.0277(4) 0.6945(2) -0.06183(17) 0.0455(17) Uani 1 1 d . . . 
C326 C -0.0287(4) 0.7327(2) -0.07557(19) 0.0566(19) Uani 1 1 d . . . 
H326 H -0.0165 0.7601 -0.0875 0.068 Uiso 1 1 calc R . . 
C327 C -0.1021(4) 0.7317(3) -0.0723(2) 0.068(2) Uani 1 1 d . . . 
H327 H -0.1395 0.7585 -0.0812 0.082 Uiso 1 1 calc R . . 
C328 C -0.1229(4) 0.6923(3) -0.0563(2) 0.066(2) Uani 1 1 d . . . 
C329 C -0.0657(4) 0.6539(2) -0.04210(19) 0.060(2) Uani 1 1 d . . . 
H329 H -0.0778 0.6265 -0.0299 0.071 Uiso 1 1 calc R . . 
C330 C 0.0071(4) 0.6549(2) -0.04541(18) 0.0529(18) Uani 1 1 d . . . 
H330 H 0.0446 0.6281 -0.0364 0.064 Uiso 1 1 calc R . . 
C331 C -0.2024(5) 0.6931(4) -0.0561(2) 0.100(3) Uani 1 1 d . . . 
H331 H -0.2382 0.7206 -0.0646 0.120 Uiso 1 1 calc R . . 
C332 C 0.1544(4) 0.6643(2) -0.03395(19) 0.0488(17) Uani 1 1 d . . . 
C333 C 0.1388(4) 0.6590(2) 0.00332(19) 0.0543(19) Uani 1 1 d . . . 
H333 H 0.0953 0.6772 0.0085 0.065 Uiso 1 1 calc R . . 
C334 C 0.1863(4) 0.6274(2) 0.0334(2) 0.0568(19) Uani 1 1 d . . . 
H334 H 0.1755 0.6245 0.0590 0.068 Uiso 1 1 calc R . . 
C335 C 0.2491(4) 0.5998(2) 0.02697(19) 0.0471(17) Uani 1 1 d . . . 
C336 C 0.2658(4) 0.6072(2) -0.0106(2) 0.061(2) Uani 1 1 d . . . 
H336 H 0.3104 0.5899 -0.0159 0.073 Uiso 1 1 calc R . . 
C337 C 0.2195(4) 0.6391(2) -0.0409(2) 0.063(2) Uani 1 1 d . . . 
H337 H 0.2325 0.6437 -0.0666 0.076 Uiso 1 1 calc R . . 
C338 C 0.2918(4) 0.5620(2) 0.0593(2) 0.0577(19) Uani 1 1 d . . . 
H338 H 0.2882 0.5625 0.0844 0.069 Uiso 1 1 calc R . . 
C339 C 0.1259(4) 0.7299(2) -0.09397(19) 0.0464(17) Uani 1 1 d . . . 
C340 C 0.1758(4) 0.7479(2) -0.0843(2) 0.062(2) Uani 1 1 d . . . 
H340 H 0.1936 0.7376 -0.0583 0.074 Uiso 1 1 calc R . . 
C341 C 0.2011(5) 0.7817(2) -0.1127(2) 0.071(2) Uani 1 1 d . . . 
H341 H 0.2355 0.7944 -0.1059 0.086 Uiso 1 1 calc R . . 
C342 C 0.1755(4) 0.7964(2) -0.1505(2) 0.0555(19) Uani 1 1 d . . . 
C343 C 0.1248(4) 0.7781(2) -0.1593(2) 0.0511(18) Uani 1 1 d . . . 
H343 H 0.1061 0.7885 -0.1851 0.061 Uiso 1 1 calc R . . 
C344 C 0.1003(4) 0.7451(2) -0.13163(18) 0.0464(17) Uani 1 1 d . . . 
H344 H 0.0655 0.7328 -0.1385 0.056 Uiso 1 1 calc R . . 
C345 C 0.2054(5) 0.8310(2) -0.1804(2) 0.074(2) Uani 1 1 d . . . 
H345 H 0.2406 0.8430 -0.1732 0.089 Uiso 1 1 calc R . . 
C346 C -0.0054(4) 0.6839(2) 0.10690(18) 0.0457(17) Uani 1 1 d . . . 
C347 C 0.0094(4) 0.6755(2) 0.07390(19) 0.0486(17) Uani 1 1 d . . . 
H347 H 0.0544 0.6790 0.0616 0.058 Uiso 1 1 calc R . . 
C348 C -0.0413(4) 0.6619(2) 0.05891(19) 0.0517(18) Uani 1 1 d . . . 
H348 H -0.0312 0.6568 0.0358 0.062 Uiso 1 1 calc R . . 
C349 C -0.1064(4) 0.6554(2) 0.07639(18) 0.0478(17) Uani 1 1 d . . . 
C350 C -0.1211(4) 0.6652(2) 0.10920(19) 0.0511(18) Uani 1 1 d . . . 
H350 H -0.1663 0.6619 0.1214 0.061 Uiso 1 1 calc R . . 
C351 C -0.0714(4) 0.6797(2) 0.12442(19) 0.0500(18) Uani 1 1 d . . . 
H351 H -0.0825 0.6865 0.1466 0.060 Uiso 1 1 calc R . . 
C352 C -0.1546(4) 0.6348(2) 0.0633(2) 0.0567(19) Uani 1 1 d . . . 
H352 H -0.1449 0.6302 0.0400 0.068 Uiso 1 1 calc R . . 
C353 C 0.0309(4) 0.7381(2) 0.12541(19) 0.0450(17) Uani 1 1 d . . . 
C354 C -0.0205(4) 0.7717(2) 0.09921(19) 0.0519(18) Uani 1 1 d . . . 
H354 H -0.0408 0.7673 0.0787 0.062 Uiso 1 1 calc R . . 
C355 C -0.0433(4) 0.8125(2) 0.1027(2) 0.0520(18) Uani 1 1 d . . . 
H355 H -0.0779 0.8360 0.0841 0.062 Uiso 1 1 calc R . . 
C356 C -0.0151(4) 0.8187(2) 0.13347(19) 0.0474(17) Uani 1 1 d . . . 
C357 C 0.0383(4) 0.7848(2) 0.15865(18) 0.0474(17) Uani 1 1 d . . . 
H357 H 0.0592 0.7889 0.1791 0.057 Uiso 1 1 calc R . . 
C358 C 0.0619(4) 0.7450(2) 0.15469(18) 0.0465(17) Uani 1 1 d . . . 
H358 H 0.0995 0.7223 0.1720 0.056 Uiso 1 1 calc R . . 
C359 C -0.0443(4) 0.8612(2) 0.1374(2) 0.0527(18) Uani 1 1 d . . . 
H359 H -0.0767 0.8843 0.1174 0.063 Uiso 1 1 calc R . . 
C360 C 0.1241(4) 0.6721(2) 0.12589(18) 0.0461(17) Uani 1 1 d . . . 
C361 C 0.1807(4) 0.6923(2) 0.1115(2) 0.059(2) Uani 1 1 d . . . 
H361 H 0.1698 0.7234 0.0995 0.071 Uiso 1 1 calc R . . 
C362 C 0.2537(4) 0.6677(2) 0.1144(2) 0.064(2) Uani 1 1 d . . . 
H362 H 0.2915 0.6823 0.1036 0.076 Uiso 1 1 calc R . . 
C363 C 0.2725(4) 0.6226(2) 0.13260(19) 0.0530(18) Uani 1 1 d . . . 
C364 C 0.2148(4) 0.6024(2) 0.14618(18) 0.0493(17) Uani 1 1 d . . . 
H364 H 0.2258 0.5713 0.1579 0.059 Uiso 1 1 calc R . . 
C365 C 0.1421(4) 0.6265(2) 0.14301(17) 0.0452(17) Uani 1 1 d . . . 
H365 H 0.1039 0.6118 0.1526 0.054 Uiso 1 1 calc R . . 
C366 C 0.3508(4) 0.5990(3) 0.1374(2) 0.0558(19) Uani 1 1 d . . . 
H366 H 0.3859 0.6147 0.1244 0.067 Uiso 1 1 calc R . . 
C367 C 0.3171(4) 0.7674(3) 0.0051(3) 0.068(2) Uani 1 1 d . . . 
C368 C 0.3089(6) 0.7477(3) -0.0201(3) 0.096(3) Uani 1 1 d . . . 
H368 H 0.2792 0.7643 -0.0433 0.116 Uiso 1 1 calc R . . 
C369 C 0.3433(7) 0.7047(3) -0.0115(4) 0.116(4) Uani 1 1 d . . . 
H369 H 0.3350 0.6911 -0.0282 0.139 Uiso 1 1 calc R . . 
C370 C 0.3883(5) 0.6813(3) 0.0197(4) 0.086(3) Uani 1 1 d . . . 
C371 C 0.3995(4) 0.7007(3) 0.0449(3) 0.078(3) Uani 1 1 d . . . 
H371 H 0.4320 0.6840 0.0672 0.093 Uiso 1 1 calc R . . 
C372 C 0.3636(4) 0.7443(3) 0.0378(3) 0.068(2) Uani 1 1 d . . . 
H372 H 0.3709 0.7577 0.0549 0.082 Uiso 1 1 calc R . . 
C373 C 0.4290(7) 0.6341(5) 0.0235(3) 0.126(5) Uani 1 1 d . . . 
H373 H 0.4164 0.6212 0.0071 0.151 Uiso 1 1 calc R . . 
C374 C 0.2495(4) 0.8258(2) 0.0263(2) 0.061(2) Uani 1 1 d . . . 
C375 C 0.2059(4) 0.8038(2) 0.0529(2) 0.0585(19) Uani 1 1 d . . . 
H375 H 0.1967 0.7781 0.0518 0.070 Uiso 1 1 calc R . . 
C376 C 0.1753(4) 0.8177(2) 0.0809(2) 0.0586(19) Uani 1 1 d . . . 
H376 H 0.1436 0.8024 0.0982 0.070 Uiso 1 1 calc R . . 
C377 C 0.1900(4) 0.8537(2) 0.0845(2) 0.0573(19) Uani 1 1 d . . . 
C378 C 0.2331(5) 0.8772(3) 0.0571(2) 0.079(2) Uani 1 1 d . . . 
H378 H 0.2414 0.9032 0.0580 0.095 Uiso 1 1 calc R . . 
C379 C 0.2635(5) 0.8627(3) 0.0288(2) 0.079(3) Uani 1 1 d . . . 
H379 H 0.2942 0.8782 0.0110 0.094 Uiso 1 1 calc R . . 
C380 C 0.1639(4) 0.8663(2) 0.1169(2) 0.059(2) Uani 1 1 d . . . 
H380 H 0.1258 0.8547 0.1315 0.071 Uiso 1 1 calc R . . 
C381 C 0.2472(5) 0.8397(2) -0.0409(2) 0.063(2) Uani 1 1 d . . . 
C382 C 0.2912(5) 0.8510(3) -0.0726(3) 0.074(2) Uani 1 1 d . . . 
H382 H 0.3434 0.8388 -0.0697 0.089 Uiso 1 1 calc R . . 
C383 C 0.2582(6) 0.8802(3) -0.1082(3) 0.079(3) Uani 1 1 d . . . 
H383 H 0.2883 0.8892 -0.1294 0.095 Uiso 1 1 calc R . . 
C384 C 0.1816(6) 0.8963(3) -0.1133(2) 0.072(2) Uani 1 1 d . . . 
C385 C 0.1386(5) 0.8834(3) -0.0828(2) 0.075(2) Uani 1 1 d . . . 
H385 H 0.0860 0.8936 -0.0861 0.089 Uiso 1 1 calc R . . 
C386 C 0.1717(5) 0.8553(3) -0.0469(2) 0.074(2) Uani 1 1 d . . . 
H386 H 0.1411 0.8466 -0.0260 0.089 Uiso 1 1 calc R . . 
C387 C 0.1442(6) 0.9304(3) -0.1503(2) 0.084(3) Uani 1 1 d . . . 
H387 H 0.0918 0.9365 -0.1541 0.100 Uiso 1 1 calc R . . 
C388 C -0.0862(4) 0.8768(2) -0.07472(19) 0.0484(17) Uani 1 1 d . . . 
C389 C -0.0428(4) 0.8435(2) -0.0838(2) 0.059(2) Uani 1 1 d . . . 
H389 H -0.0308 0.8145 -0.0647 0.070 Uiso 1 1 calc R . . 
C390 C -0.0160(4) 0.8509(2) -0.1198(2) 0.060(2) Uani 1 1 d . . . 
H390 H 0.0156 0.8275 -0.1252 0.072 Uiso 1 1 calc R . . 
C391 C -0.0352(4) 0.8926(2) -0.14821(19) 0.0546(19) Uani 1 1 d . . . 
C392 C -0.0779(4) 0.9263(2) -0.1387(2) 0.067(2) Uani 1 1 d . . . 
H392 H -0.0897 0.9553 -0.1576 0.080 Uiso 1 1 calc R . . 
C393 C -0.1038(4) 0.9186(2) -0.1022(2) 0.066(2) Uani 1 1 d . . . 
H393 H -0.1335 0.9421 -0.0963 0.080 Uiso 1 1 calc R . . 
C394 C -0.0119(5) 0.8989(2) -0.1873(2) 0.073(2) Uani 1 1 d . . . 
H394 H 0.0232 0.8759 -0.1918 0.087 Uiso 1 1 calc R . . 
C395 C -0.0101(4) 0.8792(2) -0.0098(2) 0.0580(19) Uani 1 1 d . . . 
H395 H 0.0218 0.8613 -0.0212 0.070 Uiso 1 1 calc R . . 
C396 C 0.0206(4) 0.8981(2) 0.0103(2) 0.062(2) Uani 1 1 d . . . 
H396 H 0.0730 0.8933 0.0123 0.075 Uiso 1 1 calc R . . 
C397 C -0.0242(5) 0.9237(2) 0.0275(2) 0.0574(19) Uani 1 1 d . . . 
C398 C -0.1008(5) 0.9288(2) 0.0248(2) 0.065(2) Uani 1 1 d . . . 
H398 H -0.1326 0.9456 0.0372 0.077 Uiso 1 1 calc R . . 
C399 C -0.1315(4) 0.9098(2) 0.0045(2) 0.059(2) Uani 1 1 d . . . 
H399 H -0.1837 0.9134 0.0033 0.071 Uiso 1 1 calc R . . 
C400 C -0.0863(4) 0.8858(2) -0.01362(19) 0.0512(18) Uani 1 1 d . . . 
C401 C 0.0103(5) 0.9470(3) 0.0445(2) 0.067(2) Uani 1 1 d . . . 
H401 H 0.0629 0.9393 0.0482 0.081 Uiso 1 1 calc R . . 
C402 C -0.1592(4) 0.8386(2) -0.0231(2) 0.0527(18) Uani 1 1 d . . . 
C403 C -0.1544(5) 0.8129(2) 0.0160(2) 0.067(2) Uani 1 1 d . . . 
H403 H -0.1217 0.8157 0.0330 0.080 Uiso 1 1 calc R . . 
C404 C -0.1971(6) 0.7835(3) 0.0298(3) 0.079(3) Uani 1 1 d . . . 
H404 H -0.1921 0.7655 0.0565 0.095 Uiso 1 1 calc R . . 
C405 C -0.2462(5) 0.7791(3) 0.0071(3) 0.076(2) Uani 1 1 d . . . 
C406 C -0.2504(4) 0.8042(3) -0.0325(3) 0.075(2) Uani 1 1 d . . . 
H406 H -0.2833 0.8010 -0.0492 0.091 Uiso 1 1 calc R . . 
C407 C -0.2069(4) 0.8332(2) -0.0471(2) 0.064(2) Uani 1 1 d . . . 
H407 H -0.2094 0.8498 -0.0740 0.077 Uiso 1 1 calc R . . 
C408 C -0.2958(7) 0.7497(3) 0.0247(3) 0.105(4) Uani 1 1 d . . . 
H408 H -0.2822 0.7282 0.0499 0.127 Uiso 1 1 calc R . . 
C409 C -0.3348(6) 0.6380(4) -0.0102(3) 0.121(4) Uani 1 1 d . . . 
H40A H -0.3857 0.6363 -0.0148 0.145 Uiso 1 1 calc R . . 
H40B H -0.3027 0.6077 -0.0002 0.145 Uiso 1 1 calc R . . 
C410 C -0.3061(5) 0.6646(5) -0.0489(3) 0.151(6) Uani 1 1 d . . . 
H41A H -0.3178 0.6550 -0.0691 0.182 Uiso 1 1 calc R . . 
H41B H -0.3311 0.6962 -0.0566 0.182 Uiso 1 1 calc R . . 
C411 C -0.3255(5) 0.6219(3) 0.0571(3) 0.087(3) Uani 1 1 d . . . 
H41C H -0.3537 0.6006 0.0577 0.105 Uiso 1 1 calc R . . 
H41D H -0.3461 0.6349 0.0760 0.105 Uiso 1 1 calc R . . 
C412 C -0.2466(5) 0.5982(3) 0.0687(2) 0.070(2) Uani 1 1 d . . . 
H41E H -0.2439 0.5692 0.0894 0.084 Uiso 1 1 calc R . . 
H41F H -0.2211 0.5933 0.0466 0.084 Uiso 1 1 calc R . . 
C413 C -0.4057(6) 0.6906(5) 0.0134(4) 0.163(7) Uani 1 1 d . . . 
H41G H -0.4461 0.6764 0.0249 0.196 Uiso 1 1 calc R . . 
H41H H -0.4186 0.7069 -0.0145 0.196 Uiso 1 1 calc R . . 
C414 C -0.4004(7) 0.7228(4) 0.0316(6) 0.210(9) Uani 1 1 d . . . 
H41I H -0.4507 0.7404 0.0332 0.252 Uiso 1 1 calc R . . 
H41J H -0.3771 0.7066 0.0580 0.252 Uiso 1 1 calc R . . 
C415 C 0.4536(4) 0.4896(2) 0.0893(2) 0.068(2) Uani 1 1 d . . . 
H41K H 0.4815 0.4600 0.1065 0.081 Uiso 1 1 calc R . . 
H41L H 0.4713 0.4951 0.0631 0.081 Uiso 1 1 calc R . . 
C416 C 0.3700(4) 0.4916(2) 0.0889(2) 0.072(2) Uani 1 1 d . . . 
H41M H 0.3626 0.4640 0.0884 0.086 Uiso 1 1 calc R . . 
H41N H 0.3485 0.4951 0.1123 0.086 Uiso 1 1 calc R . . 
C417 C 0.4754(4) 0.5048(3) 0.1443(2) 0.078(2) Uani 1 1 d . . . 
H41O H 0.5273 0.4874 0.1526 0.094 Uiso 1 1 calc R . . 
H41P H 0.4425 0.4847 0.1548 0.094 Uiso 1 1 calc R . . 
C418 C 0.4564(4) 0.5402(3) 0.1609(2) 0.077(2) Uani 1 1 d . . . 
H41Q H 0.4749 0.5276 0.1881 0.092 Uiso 1 1 calc R . . 
H41R H 0.4808 0.5639 0.1465 0.092 Uiso 1 1 calc R . . 
C419 C 0.5326(4) 0.5370(2) 0.0850(2) 0.066(2) Uani 1 1 d . . . 
H41S H 0.5722 0.5112 0.0854 0.079 Uiso 1 1 calc R . . 
H41T H 0.5517 0.5506 0.1004 0.079 Uiso 1 1 calc R . . 
C420 C 0.5157(4) 0.5696(2) 0.0443(2) 0.080(3) Uani 1 1 d . . . 
H42A H 0.4826 0.5609 0.0304 0.096 Uiso 1 1 calc R . . 
H42B H 0.5620 0.5716 0.0305 0.096 Uiso 1 1 calc R . . 
C421 C 0.1570(7) 0.9159(3) -0.2685(2) 0.120(4) Uani 1 1 d . . . 
H42C H 0.1796 0.9346 -0.2907 0.144 Uiso 1 1 calc R . . 
H42D H 0.1213 0.9050 -0.2786 0.144 Uiso 1 1 calc R . . 
C422 C 0.2161(6) 0.8780(3) -0.2442(3) 0.105(4) Uani 1 1 d . . . 
H42E H 0.2479 0.8882 -0.2311 0.126 Uiso 1 1 calc R . . 
H42F H 0.2477 0.8648 -0.2607 0.126 Uiso 1 1 calc R . . 
C423 C 0.1568(7) 0.9733(3) -0.2460(3) 0.117(4) Uani 1 1 d . . . 
H42G H 0.1450 1.0000 -0.2699 0.140 Uiso 1 1 calc R . . 
H42H H 0.2109 0.9599 -0.2443 0.140 Uiso 1 1 calc R . . 
C424 C 0.1368(6) 0.9860(3) -0.2117(2) 0.102(3) Uani 1 1 d . . . 
H42I H 0.1475 1.0145 -0.2165 0.122 Uiso 1 1 calc R . . 
H42J H 0.0831 0.9890 -0.2077 0.122 Uiso 1 1 calc R . . 
C425 C 0.0413(8) 0.9664(3) -0.2666(3) 0.119(5) Uani 1 1 d . . . 
H42K H 0.0450 0.9763 -0.2948 0.143 Uiso 1 1 calc R . . 
H42L H 0.0226 0.9927 -0.2604 0.143 Uiso 1 1 calc R . . 
C426 C -0.0130(7) 0.9383(3) -0.2544(2) 0.107(4) Uani 1 1 d . . . 
H42M H -0.0563 0.9512 -0.2732 0.129 Uiso 1 1 calc R . . 
H42N H 0.0109 0.9086 -0.2538 0.129 Uiso 1 1 calc R . . 
C427 C -0.0059(4) 0.9328(2) 0.17211(19) 0.061(2) Uani 1 1 d . . . 
H42O H -0.0304 0.9583 0.1787 0.073 Uiso 1 1 calc R . . 
H42P H 0.0293 0.9117 0.1938 0.073 Uiso 1 1 calc R . . 
C428 C -0.0640(4) 0.9112(2) 0.1671(2) 0.062(2) Uani 1 1 d . . . 
H42Q H -0.0975 0.9077 0.1887 0.075 Uiso 1 1 calc R . . 
H42R H -0.0942 0.9298 0.1429 0.075 Uiso 1 1 calc R . . 
C429 C 0.1117(5) 0.9463(3) 0.1482(2) 0.072(2) Uani 1 1 d . . . 
H42S H 0.1102 0.9564 0.1697 0.086 Uiso 1 1 calc R . . 
H42T H 0.1315 0.9668 0.1260 0.086 Uiso 1 1 calc R . . 
C430 C 0.1637(5) 0.9007(3) 0.1600(2) 0.077(2) Uani 1 1 d . . . 
H43A H 0.2065 0.8984 0.1760 0.093 Uiso 1 1 calc R . . 
H43B H 0.1371 0.8785 0.1755 0.093 Uiso 1 1 calc R . . 
C431 C -0.0049(5) 0.9917(2) 0.1117(2) 0.078(3) Uani 1 1 d . . . 
H43C H 0.0083 1.0140 0.1192 0.093 Uiso 1 1 calc R . . 
H43D H -0.0590 0.9947 0.1141 0.093 Uiso 1 1 calc R . . 
C432 C 0.0137(6) 1.0000(3) 0.0699(2) 0.088(3) Uani 1 1 d . . . 
H43E H 0.0003 1.0319 0.0543 0.106 Uiso 1 1 calc R . . 
H43F H 0.0676 0.9884 0.0684 0.106 Uiso 1 1 calc R . . 
C501 C 0.7034(5) 0.4790(3) 0.5960(2) 0.074(2) Uiso 1 1 d . . . 
O1 O 0.6537(3) 0.50387(17) 0.56391(15) 0.0764(15) Uiso 1 1 d . . . 
C502 C 0.3139(4) 0.4270(2) 0.3447(2) 0.062(2) Uiso 1 1 d . . . 
O2 O 0.3675(2) 0.38651(14) 0.36427(12) 0.0549(12) Uiso 1 1 d . . . 
C503 C 0.7958(4) 0.2338(2) 0.47761(19) 0.0529(18) Uiso 1 1 d . . . 
O3 O 0.8655(2) 0.22497(14) 0.46010(12) 0.0518(12) Uiso 1 1 d . . . 
C504 C 0.9721(6) 0.9833(4) 0.4635(3) 0.122(4) Uiso 1 1 d . . . 
O4 O 0.9473(4) 1.0212(3) 0.4322(2) 0.133(3) Uiso 1 1 d . . . 
C505 C 0.6100(5) 0.1271(3) 0.3057(2) 0.080(2) Uiso 1 1 d . . . 
O5 O 0.6514(3) 0.08350(17) 0.33144(15) 0.0749(15) Uiso 1 1 d . . . 
C506 C 0.1949(6) 0.0213(3) 0.4766(3) 0.106(3) Uiso 1 1 d . . . 
O6 O 0.2718(3) 0.0189(2) 0.47200(17) 0.0959(18) Uiso 1 1 d . . . 
C507 C 0.0855(12) 0.0054(7) 0.3738(6) 0.235(8) Uiso 1 1 d . . . 
O7 O 0.0073(10) 0.0219(5) 0.3619(5) 0.291(7) Uiso 1 1 d . . . 
C508 C 0.2894(7) 1.0318(4) 0.0816(4) 0.141(4) Uiso 1 1 d . . . 
O8 O 0.2449(5) 1.0019(3) 0.0904(3) 0.173(3) Uiso 1 1 d . . . 
C509 C 0.6412(10) 0.9393(5) 0.1087(5) 0.188(6) Uiso 1 1 d . . . 
O9 O 0.7179(8) 0.9492(4) 0.0970(4) 0.244(5) Uiso 1 1 d . . . 
C510 C 0.5867(13) 0.9258(8) 0.0052(7) 0.267(10) Uiso 1 1 d . . . 
O10 O 0.6235(11) 0.8918(7) -0.0084(6) 0.345(9) Uiso 1 1 d . . . 
C511 C 0.8217(10) 0.4615(6) 0.0473(5) 0.201(7) Uiso 1 1 d . . . 
O11 O 0.7639(6) 0.5100(4) 0.0295(3) 0.198(4) Uiso 1 1 d . . . 
C512 C 0.3500(4) 0.4560(3) 0.2246(2) 0.068(2) Uiso 1 1 d . . . 
O12A O 0.3019(4) 0.4876(3) 0.1951(2) 0.078(2) Uiso 0.67 1 d P . . 
O12B O 0.3195(8) 0.5041(5) 0.2189(4) 0.071(4) Uiso 0.33 1 d P . . 
C513 C 0.7904(7) 1.0339(4) 0.0504(4) 0.121(4) Uiso 1 1 d . . . 
O13A O 0.8372(8) 1.0319(4) 0.0224(4) 0.113(4) Uiso 0.50 1 d P . . 
O13B O 0.8196(9) 0.9970(6) 0.0766(5) 0.139(5) Uiso 0.50 1 d P . . 
C514 C 0.5836(16) 0.2392(9) 0.1136(8) 0.306(12) Uiso 1 1 d . . . 
O14 O 0.5014(10) 0.2590(5) 0.1029(5) 0.291(7) Uiso 1 1 d . . . 
C515 C 0.690(2) 1.0158(13) 0.1276(11) 0.45(2) Uiso 1 1 d . . . 
O15 O 0.6189(10) 1.0059(5) 0.1246(5) 0.282(7) Uiso 1 1 d . . . 
C516 C 0.3067(11) 0.9520(6) 0.4163(5) 0.092(6) Uiso 0.50 1 d P . . 
O16 O 0.3699(3) 0.95784(19) 0.38749(17) 0.0907(17) Uiso 1 1 d . . . 
C517 C 0.2670(16) 0.9212(10) 0.4237(8) 0.158(10) Uiso 0.50 1 d P . . 
O17 O 0.2676(11) 0.8833(7) 0.4630(6) 0.179(7) Uiso 0.50 1 d P . . 
C518 C 0.5141(14) 0.4180(9) 0.0477(7) 0.136(8) Uiso 0.50 1 d P . . 
O18 O 0.5668(10) 0.3774(6) 0.0662(5) 0.148(6) Uiso 0.50 1 d P . . 
C519 C 0.4884(12) 0.3848(7) 0.0662(6) 0.107(6) Uiso 0.50 1 d P . . 
O19 O 0.4401(16) 0.3516(10) 0.0971(8) 0.263(12) Uiso 0.50 1 d P . . 
C520 C 0.4184(17) 0.9294(11) 0.0107(9) 0.172(11) Uiso 0.50 1 d P . . 
O20 O 0.4057(13) 0.9166(8) 0.0541(7) 0.208(9) Uiso 0.50 1 d P . . 
C521 C 0.7220(14) 0.4473(8) 0.0733(7) 0.132(8) Uiso 0.50 1 d P . . 
O21 O 0.6411(5) 0.4329(3) 0.0811(2) 0.145(3) Uiso 1 1 d . . . 
C522 C 0.4904(10) 0.8113(6) -0.1071(5) 0.093(6) Uiso 0.50 1 d P . . 
O22 O 0.4704(10) 0.8522(6) -0.0942(5) 0.160(6) Uiso 0.50 1 d P . . 
C523 C 0.490(2) 0.8329(14) -0.0357(13) 0.225(16) Uiso 0.50 1 d P . . 
O23 O 0.471(2) 0.8316(14) 0.0055(12) 0.350(18) Uiso 0.50 1 d P . . 
O24 O 0.3295(2) 0.41519(15) 0.48120(12) 0.0565(12) Uiso 1 1 d . . . 
O25 O 0.3557(3) 0.36099(15) 0.44007(13) 0.0613(13) Uiso 1 1 d . . . 
O26 O 0.4398(4) 0.3759(2) 0.5395(2) 0.115(2) Uiso 1 1 d . . . 
O27 O 0.3695(3) 0.75122(17) 0.32364(14) 0.0718(14) Uiso 1 1 d . . . 
O28 O 0.4829(3) 0.75876(19) 0.36490(16) 0.0883(17) Uiso 1 1 d . . . 
O29 O 0.1367(3) 0.98189(17) 0.22169(15) 0.0758(15) Uiso 1 1 d . . . 
O30 O 0.2605(4) 0.9704(2) 0.17280(19) 0.108(2) Uiso 1 1 d . . . 
O31 O 0.3933(4) 0.9102(3) 0.1761(2) 0.142(3) Uiso 1 1 d . . . 
O32 O 0.3560(5) 0.8715(3) 0.1325(3) 0.158(3) Uiso 1 1 d . . . 
O33 O 0.5980(4) 0.1174(2) 0.1655(2) 0.124(2) Uiso 1 1 d . . . 
O34 O 0.6806(4) 0.0315(2) 0.1774(2) 0.126(2) Uiso 1 1 d . . . 
O35 O 0.6373(5) 0.5015(3) 0.0054(2) 0.150(3) Uiso 1 1 d . . . 
O36 O 0.0074(4) 0.4567(3) 0.0282(2) 0.140(3) Uiso 1 1 d . . . 
O37 O 0.8492(5) 0.5677(3) -0.0106(2) 0.145(3) Uiso 1 1 d . . . 
O38 O 0.6829(7) 0.9542(4) 0.0279(4) 0.238(5) Uiso 1 1 d . . . 
O39 O 0.5040(9) 0.9481(5) 0.1330(5) 0.290(7) Uiso 1 1 d . . . 
O40 O 0.4520(14) 0.7866(9) 0.0875(7) 0.453(13) Uiso 1 1 d . . . 
O41 O 0.4534(11) 0.9254(7) -0.0693(6) 0.378(10) Uiso 1 1 d . . . 
O42 O 0.2693(8) 0.9794(5) 0.0256(4) 0.265(6) Uiso 1 1 d . . . 
O43 O 0.4260(7) 0.9677(4) 0.3107(3) 0.220(5) Uiso 1 1 d . . . 
O44 O 0.4995(17) 0.9546(10) 0.0716(9) 0.551(18) Uiso 1 1 d . . . 
O45 O 0.5468(10) 0.8162(6) -0.0440(5) 0.137(5) Uiso 0.50 1 d P . . 
O46 O 0.5929(9) 0.7849(5) -0.0824(5) 0.141(5) Uiso 0.50 1 d P . . 
O47 O 0.4400(14) 0.8595(9) 0.0750(7) 0.227(10) Uiso 0.50 1 d P . . 
O48 O 0.4339(18) 0.8806(12) 0.0038(9) 0.289(14) Uiso 0.50 1 d P . . 
 
loop_ 
 _atom_site_aniso_label 
 _atom_site_aniso_U_11 
 _atom_site_aniso_U_22 
 _atom_site_aniso_U_33 
 _atom_site_aniso_U_23 
 _atom_site_aniso_U_13 
 _atom_site_aniso_U_12 
N1 0.047(3) 0.039(3) 0.047(3) -0.017(3) 0.004(3) -0.012(3) 
N2 0.051(4) 0.054(4) 0.051(4) -0.021(3) 0.010(3) -0.016(3) 
N3 0.041(3) 0.065(4) 0.045(3) -0.025(3) 0.009(3) -0.012(3) 
N4 0.041(3) 0.048(3) 0.042(3) -0.015(3) 0.005(3) -0.016(3) 
N5 0.065(4) 0.046(3) 0.052(4) -0.022(3) -0.011(3) -0.002(3) 
N6 0.046(3) 0.041(3) 0.049(3) -0.017(3) 0.010(3) -0.016(3) 
N7 0.079(5) 0.065(4) 0.072(5) -0.035(4) 0.006(4) -0.007(4) 
N8 0.036(3) 0.039(3) 0.047(3) -0.023(3) 0.008(2) -0.013(2) 
N9 0.063(4) 0.050(4) 0.053(4) -0.016(3) -0.004(3) -0.002(3) 
N10 0.056(4) 0.037(3) 0.050(3) -0.016(3) 0.002(3) -0.012(3) 
N11 0.076(5) 0.047(4) 0.076(5) -0.023(4) -0.018(4) -0.009(3) 
N12 0.036(3) 0.033(3) 0.047(3) -0.012(2) 0.004(3) -0.009(2) 
N13 0.054(4) 0.052(4) 0.052(4) -0.022(3) 0.017(3) -0.022(3) 
N14 0.047(4) 0.040(3) 0.052(4) -0.015(3) 0.000(3) -0.013(3) 
N15 0.073(5) 0.086(5) 0.071(5) -0.042(4) 0.011(4) -0.014(4) 
N16 0.116(6) 0.072(5) 0.057(4) -0.029(4) 0.016(4) -0.035(4) 
N17 0.084(5) 0.061(4) 0.083(5) -0.037(4) 0.008(4) -0.007(4) 
N18 0.047(4) 0.036(3) 0.042(3) -0.011(3) 0.002(3) -0.014(3) 
N19 0.044(3) 0.039(3) 0.051(4) -0.021(3) 0.008(3) -0.016(3) 
N20 0.037(3) 0.044(3) 0.046(3) -0.017(3) 0.005(3) -0.011(3) 
C1 0.038(4) 0.051(5) 0.045(4) -0.019(4) 0.006(3) -0.013(4) 
C2 0.045(4) 0.049(4) 0.046(4) -0.019(4) 0.006(3) -0.017(4) 
C3 0.059(5) 0.046(4) 0.044(4) -0.018(4) 0.010(4) -0.018(4) 
C4 0.057(5) 0.045(4) 0.041(4) -0.014(3) -0.006(4) -0.007(4) 
C5 0.057(5) 0.058(5) 0.063(5) -0.022(4) -0.006(4) -0.014(4) 
C6 0.063(5) 0.041(4) 0.057(5) -0.012(4) 0.003(4) -0.013(4) 
C7 0.057(5) 0.059(5) 0.059(5) -0.025(4) -0.007(4) -0.005(4) 
C8 0.046(4) 0.044(4) 0.048(4) -0.017(3) 0.003(3) -0.015(3) 
C9 0.077(5) 0.055(5) 0.056(5) -0.025(4) 0.017(4) -0.025(4) 
C10 0.089(6) 0.070(6) 0.063(5) -0.040(5) 0.018(4) -0.024(5) 
C11 0.056(5) 0.049(4) 0.050(4) -0.017(4) 0.002(4) -0.010(4) 
C12 0.051(4) 0.045(4) 0.051(4) -0.011(3) 0.002(4) -0.010(3) 
C13 0.052(4) 0.043(4) 0.049(4) -0.017(3) 0.002(3) -0.007(3) 
C14 0.077(6) 0.052(5) 0.065(5) -0.029(4) 0.003(4) -0.016(4) 
C15 0.042(4) 0.048(4) 0.039(4) -0.017(3) 0.007(3) -0.013(4) 
C16 0.042(4) 0.037(4) 0.051(4) -0.021(3) 0.012(3) -0.011(3) 
C17 0.039(4) 0.039(4) 0.042(4) -0.014(3) 0.003(3) -0.012(3) 
C18 0.037(4) 0.034(4) 0.035(4) -0.009(3) 0.006(3) -0.011(3) 
C19 0.044(4) 0.040(4) 0.045(4) -0.019(3) 0.009(3) -0.014(3) 
C20 0.036(4) 0.048(4) 0.043(4) -0.015(3) 0.007(3) -0.012(3) 
C21 0.049(5) 0.034(4) 0.048(4) -0.016(3) 0.014(4) -0.016(3) 
C22 0.051(5) 0.055(5) 0.042(4) -0.017(4) 0.001(4) -0.010(4) 
C23 0.050(5) 0.052(4) 0.051(4) -0.019(4) 0.000(4) -0.007(4) 
C24 0.042(4) 0.054(5) 0.050(4) -0.022(4) 0.002(3) -0.011(4) 
C25 0.050(5) 0.047(4) 0.050(4) -0.022(4) 0.005(4) -0.014(4) 
C26 0.053(5) 0.052(4) 0.050(4) -0.016(4) 0.005(4) -0.004(4) 
C27 0.044(4) 0.069(5) 0.057(5) -0.025(4) 0.000(4) -0.012(4) 
C28 0.059(5) 0.048(4) 0.048(4) -0.018(3) 0.006(4) -0.013(4) 
C29 0.060(5) 0.046(4) 0.052(4) -0.020(4) 0.001(4) -0.016(4) 
C30 0.050(5) 0.064(5) 0.051(4) -0.017(4) 0.005(4) -0.018(4) 
C31 0.069(5) 0.065(5) 0.048(4) -0.024(4) 0.002(4) -0.024(4) 
C32 0.054(5) 0.066(5) 0.047(4) -0.022(4) 0.008(4) -0.019(4) 
C33 0.059(5) 0.057(5) 0.061(5) -0.022(4) 0.005(4) -0.022(4) 
C34 0.055(5) 0.056(5) 0.066(5) -0.026(4) 0.009(4) -0.019(4) 
C35 0.065(5) 0.068(5) 0.056(5) -0.024(4) 0.006(4) -0.020(4) 
C36 0.049(4) 0.051(5) 0.055(5) -0.024(4) -0.003(4) -0.014(4) 
C37 0.051(4) 0.059(5) 0.056(5) -0.029(4) 0.003(4) -0.015(4) 
C38 0.061(5) 0.052(5) 0.062(5) -0.024(4) 0.004(4) -0.018(4) 
C39 0.066(5) 0.058(5) 0.057(5) -0.028(4) 0.006(4) -0.020(4) 
C40 0.071(5) 0.060(5) 0.075(6) -0.043(5) 0.006(4) -0.020(4) 
C41 0.059(5) 0.075(6) 0.056(5) -0.034(4) 0.002(4) -0.022(4) 
C42 0.064(5) 0.055(5) 0.079(6) -0.040(5) 0.007(4) -0.022(4) 
C43 0.038(4) 0.047(4) 0.051(5) -0.022(4) 0.006(3) -0.010(3) 
C44 0.042(4) 0.036(4) 0.050(5) -0.016(3) 0.002(3) -0.008(3) 
C45 0.039(4) 0.032(4) 0.047(4) -0.017(3) 0.004(3) -0.006(3) 
C46 0.043(4) 0.038(4) 0.039(4) -0.013(3) 0.007(3) -0.005(3) 
C47 0.040(4) 0.053(4) 0.060(5) -0.024(4) 0.014(4) -0.023(3) 
C48 0.054(5) 0.058(5) 0.042(4) -0.010(4) 0.008(4) -0.011(4) 
C49 0.040(4) 0.037(4) 0.050(5) -0.021(3) 0.013(3) -0.014(3) 
C50 0.044(4) 0.055(5) 0.052(5) -0.020(4) 0.000(3) -0.012(4) 
C51 0.060(5) 0.063(5) 0.046(4) -0.020(4) -0.002(4) -0.016(4) 
C52 0.056(5) 0.051(4) 0.056(5) -0.018(4) -0.002(4) -0.011(4) 
C53 0.053(5) 0.064(5) 0.046(5) -0.021(4) 0.001(4) -0.020(4) 
C54 0.051(5) 0.060(5) 0.046(4) -0.013(4) -0.003(4) -0.004(4) 
C55 0.052(5) 0.051(4) 0.053(5) -0.017(4) -0.001(4) -0.001(4) 
C56 0.073(6) 0.067(6) 0.057(5) -0.023(4) 0.003(4) -0.023(5) 
C57 0.041(4) 0.047(4) 0.043(4) -0.017(3) 0.001(3) -0.008(3) 
C58 0.048(5) 0.085(6) 0.060(5) -0.046(4) 0.007(4) -0.017(4) 
C59 0.049(5) 0.066(5) 0.054(5) -0.025(4) 0.008(4) -0.020(4) 
C60 0.046(4) 0.034(4) 0.044(4) -0.011(3) 0.002(3) -0.008(3) 
C61 0.046(4) 0.034(4) 0.052(4) -0.013(3) 0.009(3) -0.005(3) 
C62 0.047(4) 0.033(4) 0.048(4) -0.008(3) -0.002(3) -0.005(3) 
C63 0.040(4) 0.041(4) 0.047(4) -0.012(3) -0.002(3) -0.001(3) 
C64 0.036(4) 0.039(4) 0.042(4) -0.012(3) 0.004(3) -0.010(3) 
C65 0.043(4) 0.027(3) 0.044(4) -0.015(3) 0.001(3) -0.004(3) 
C66 0.036(4) 0.030(3) 0.038(4) -0.009(3) 0.007(3) -0.003(3) 
C67 0.037(4) 0.028(3) 0.041(4) -0.014(3) 0.002(3) -0.008(3) 
C68 0.048(4) 0.051(4) 0.048(4) -0.026(3) 0.004(3) -0.019(4) 
C69 0.044(4) 0.058(4) 0.038(4) -0.023(3) 0.008(3) -0.017(4) 
C70 0.042(4) 0.032(4) 0.048(4) -0.017(3) 0.005(3) -0.004(3) 
C71 0.039(4) 0.040(4) 0.037(4) -0.011(3) 0.001(3) -0.010(3) 
C72 0.041(4) 0.043(4) 0.047(4) -0.023(3) 0.014(3) -0.018(3) 
C73 0.038(4) 0.038(4) 0.048(4) -0.020(3) 0.000(3) -0.004(3) 
C74 0.043(4) 0.037(4) 0.040(4) -0.015(3) 0.001(3) -0.008(3) 
C75 0.042(4) 0.062(5) 0.051(4) -0.009(4) 0.009(3) -0.011(4) 
C76 0.037(4) 0.054(5) 0.057(5) -0.007(4) 0.005(4) -0.001(3) 
C77 0.049(4) 0.053(5) 0.049(4) -0.024(4) 0.007(3) -0.020(4) 
C78 0.031(4) 0.041(4) 0.046(4) -0.021(3) 0.004(3) -0.005(3) 
C79 0.049(4) 0.037(4) 0.047(4) -0.012(3) 0.005(4) -0.016(3) 
C80 0.035(4) 0.041(4) 0.051(4) -0.019(3) 0.005(3) -0.012(3) 
C81 0.034(4) 0.033(4) 0.049(4) -0.019(3) 0.006(3) -0.006(3) 
C82 0.042(4) 0.033(4) 0.057(5) -0.013(3) -0.004(4) -0.004(3) 
C83 0.041(4) 0.028(4) 0.061(5) -0.017(3) -0.006(4) -0.005(3) 
C84 0.036(4) 0.035(4) 0.046(4) -0.014(3) 0.007(3) -0.004(3) 
C85 0.080(6) 0.049(5) 0.049(4) -0.013(4) 0.004(4) -0.009(4) 
C86 0.067(5) 0.056(5) 0.049(5) -0.014(4) -0.007(4) -0.003(4) 
C87 0.072(5) 0.047(4) 0.068(5) -0.028(4) -0.014(4) -0.002(4) 
C88 0.063(5) 0.051(5) 0.081(6) -0.033(4) -0.024(4) 0.005(4) 
C89 0.073(5) 0.039(4) 0.052(5) -0.015(4) -0.002(4) -0.012(4) 
C90 0.074(5) 0.038(4) 0.051(4) -0.019(3) 0.004(4) -0.013(4) 
C91 0.045(4) 0.043(4) 0.059(5) -0.017(3) 0.004(4) -0.016(3) 
C92 0.062(5) 0.054(4) 0.059(5) -0.027(4) 0.009(4) -0.027(4) 
C93 0.054(5) 0.035(4) 0.060(5) -0.016(3) 0.010(4) -0.013(3) 
C94 0.055(5) 0.037(4) 0.049(4) -0.008(3) 0.001(4) -0.010(3) 
C95 0.040(4) 0.046(4) 0.054(4) -0.021(3) 0.009(3) -0.015(3) 
C96 0.044(4) 0.037(4) 0.058(4) -0.016(3) 0.008(3) -0.008(3) 
C97 0.092(7) 0.055(5) 0.083(6) -0.037(5) 0.007(5) 0.002(5) 
C98 0.106(7) 0.047(5) 0.101(7) -0.041(5) 0.000(5) -0.003(5) 
C99 0.098(7) 0.070(6) 0.075(6) -0.041(5) 0.020(5) -0.026(5) 
C100 0.077(6) 0.086(6) 0.059(5) -0.035(5) 0.017(4) -0.004(5) 
C101 0.125(8) 0.060(5) 0.084(6) -0.039(5) 0.021(6) -0.035(5) 
C102 0.112(8) 0.091(7) 0.075(6) -0.045(5) 0.023(5) -0.051(6) 
C103 0.043(4) 0.042(4) 0.042(4) -0.021(3) 0.006(3) -0.014(3) 
C104 0.043(4) 0.039(4) 0.047(4) -0.018(3) 0.002(3) -0.016(3) 
C105 0.044(4) 0.042(4) 0.051(4) -0.022(3) 0.005(3) -0.012(3) 
C106 0.038(4) 0.044(4) 0.061(5) -0.021(3) 0.002(3) -0.011(3) 
C107 0.044(4) 0.045(4) 0.044(4) -0.022(3) 0.002(3) -0.011(3) 
C108 0.044(4) 0.058(4) 0.043(4) -0.026(3) 0.004(3) -0.010(3) 
N21 0.047(4) 0.032(3) 0.054(3) -0.016(3) 0.006(3) -0.010(3) 
N22 0.045(3) 0.034(3) 0.039(3) -0.014(2) 0.008(3) -0.016(3) 
N23 0.038(3) 0.033(3) 0.043(3) -0.008(3) 0.004(3) -0.008(3) 
N24 0.048(3) 0.036(3) 0.041(3) -0.014(3) 0.005(3) -0.007(3) 
N25 0.045(3) 0.048(3) 0.044(3) -0.024(3) 0.006(3) -0.007(3) 
N26 0.044(3) 0.042(3) 0.042(3) -0.018(3) 0.007(3) -0.015(3) 
N27 0.042(3) 0.039(3) 0.040(3) -0.010(3) 0.005(2) -0.016(3) 
N28 0.055(4) 0.048(4) 0.060(4) -0.021(3) -0.017(3) 0.005(3) 
N29 0.051(4) 0.042(3) 0.051(4) -0.021(3) 0.009(3) -0.005(3) 
N30 0.042(3) 0.044(3) 0.042(3) -0.020(3) 0.004(3) -0.004(3) 
N31 0.043(3) 0.039(3) 0.041(3) -0.015(3) 0.002(3) -0.011(3) 
N32 0.057(4) 0.042(3) 0.040(3) -0.013(3) 0.000(3) -0.019(3) 
N33 0.046(3) 0.040(3) 0.042(3) -0.018(3) 0.008(3) -0.013(3) 
N34 0.047(3) 0.034(3) 0.048(4) -0.015(3) 0.013(3) -0.007(3) 
N35 0.051(4) 0.035(3) 0.046(3) -0.011(3) 0.001(3) -0.011(3) 
N36 0.049(4) 0.040(3) 0.046(3) -0.020(3) 0.005(3) -0.015(3) 
N37 0.043(3) 0.039(3) 0.050(3) -0.018(3) 0.006(3) -0.018(3) 
N38 0.074(5) 0.069(5) 0.076(5) -0.038(4) -0.015(4) 0.010(4) 
N39 0.046(4) 0.042(4) 0.100(5) -0.034(4) 0.003(4) -0.006(3) 
N40 0.051(4) 0.044(4) 0.063(4) -0.011(3) -0.006(3) -0.008(3) 
C109 0.050(4) 0.035(4) 0.043(4) -0.010(3) 0.006(3) -0.013(3) 
C110 0.049(4) 0.033(4) 0.044(4) -0.011(3) 0.006(3) -0.007(3) 
C111 0.046(4) 0.044(4) 0.039(4) -0.014(3) 0.006(3) -0.008(3) 
C112 0.047(4) 0.032(4) 0.045(4) -0.006(3) 0.004(3) -0.007(3) 
C113 0.054(5) 0.038(4) 0.050(4) -0.006(3) 0.001(4) -0.011(3) 
C114 0.057(5) 0.046(5) 0.047(4) -0.012(4) -0.003(4) -0.018(4) 
C115 0.043(4) 0.037(4) 0.050(4) -0.010(3) 0.004(3) -0.004(3) 
C116 0.047(4) 0.029(4) 0.045(4) -0.010(3) 0.003(3) -0.009(3) 
C117 0.056(5) 0.046(4) 0.045(4) -0.018(3) 0.012(4) -0.015(4) 
C118 0.047(4) 0.044(4) 0.051(4) -0.019(3) 0.012(3) -0.014(3) 
C119 0.046(4) 0.036(4) 0.040(4) -0.010(3) 0.005(3) -0.008(3) 
C120 0.055(5) 0.044(4) 0.048(4) -0.021(3) 0.009(4) -0.013(4) 
C121 0.051(5) 0.046(4) 0.047(4) -0.018(3) 0.011(3) -0.013(4) 
C122 0.049(4) 0.038(4) 0.038(4) -0.007(3) 0.005(3) -0.008(3) 
C123 0.047(4) 0.043(4) 0.048(4) -0.021(3) 0.007(3) -0.011(4) 
C124 0.057(5) 0.038(4) 0.067(5) -0.013(4) -0.002(4) -0.014(4) 
C125 0.058(5) 0.037(4) 0.066(5) -0.018(4) -0.011(4) -0.004(4) 
C126 0.055(5) 0.063(5) 0.064(5) -0.036(4) -0.001(4) -0.008(4) 
C127 0.055(5) 0.053(5) 0.068(5) -0.017(4) 0.017(4) -0.008(4) 
C128 0.062(5) 0.047(4) 0.062(5) -0.013(4) 0.009(4) -0.006(4) 
C129 0.063(6) 0.073(6) 0.067(5) -0.040(5) -0.003(4) -0.003(5) 
C130 0.040(4) 0.033(4) 0.041(4) -0.018(3) 0.008(3) -0.010(3) 
C131 0.047(4) 0.030(4) 0.041(4) -0.014(3) 0.007(3) -0.007(3) 
C132 0.040(4) 0.031(4) 0.041(4) -0.005(3) 0.005(3) -0.005(3) 
C133 0.031(4) 0.033(4) 0.042(4) -0.017(3) 0.006(3) -0.008(3) 
C134 0.040(4) 0.033(4) 0.047(4) -0.019(3) -0.001(3) -0.006(3) 
C135 0.048(4) 0.029(4) 0.036(4) -0.011(3) 0.003(3) -0.005(3) 
C136 0.035(4) 0.039(4) 0.047(4) -0.021(4) 0.007(3) -0.012(3) 
C137 0.042(4) 0.033(4) 0.038(4) -0.018(3) 0.006(3) -0.008(3) 
C138 0.044(4) 0.037(4) 0.039(4) -0.016(3) 0.003(3) -0.008(3) 
C139 0.039(4) 0.034(4) 0.044(4) -0.017(3) 0.000(3) -0.006(3) 
C140 0.040(4) 0.035(4) 0.041(4) -0.018(3) 0.008(3) -0.008(3) 
C141 0.044(4) 0.034(4) 0.040(4) -0.010(3) 0.005(3) -0.009(3) 
C142 0.040(4) 0.041(4) 0.043(4) -0.018(3) 0.006(3) -0.012(3) 
C143 0.050(5) 0.030(4) 0.044(4) -0.018(3) 0.005(3) -0.011(3) 
C144 0.038(4) 0.028(3) 0.039(4) -0.006(3) 0.006(3) -0.007(3) 
C145 0.039(4) 0.040(4) 0.043(4) -0.016(3) 0.011(3) -0.012(3) 
C146 0.044(4) 0.037(4) 0.032(4) -0.013(3) 0.004(3) -0.011(3) 
C147 0.040(4) 0.024(3) 0.037(4) -0.010(3) 0.005(3) -0.004(3) 
C148 0.038(4) 0.038(4) 0.044(4) -0.018(3) 0.002(3) -0.009(3) 
C149 0.045(4) 0.036(4) 0.035(4) -0.015(3) 0.005(3) -0.004(3) 
C150 0.039(4) 0.039(4) 0.041(4) -0.014(3) 0.008(3) -0.002(3) 
C151 0.044(4) 0.030(4) 0.047(4) -0.015(3) 0.008(3) -0.012(3) 
C152 0.049(4) 0.037(4) 0.047(4) -0.008(3) 0.008(3) -0.015(3) 
C153 0.044(4) 0.035(4) 0.055(5) -0.010(3) 0.006(4) -0.006(3) 
C154 0.046(4) 0.041(4) 0.051(5) -0.016(3) 0.001(4) -0.012(3) 
C155 0.055(5) 0.048(4) 0.047(4) -0.017(4) 0.001(4) -0.011(4) 
C156 0.042(4) 0.047(4) 0.052(5) -0.023(4) 0.003(4) -0.005(3) 
C157 0.056(5) 0.051(5) 0.051(5) -0.011(4) -0.003(4) -0.019(4) 
C158 0.038(4) 0.033(4) 0.040(4) -0.012(3) 0.002(3) -0.010(3) 
C159 0.039(4) 0.032(4) 0.055(4) -0.017(3) 0.007(3) -0.008(3) 
C160 0.051(5) 0.029(4) 0.051(4) -0.012(3) 0.002(3) -0.014(3) 
C161 0.044(4) 0.031(4) 0.041(4) -0.013(3) 0.005(3) -0.013(3) 
C162 0.040(4) 0.036(4) 0.053(4) -0.020(3) 0.004(3) -0.003(3) 
C163 0.049(5) 0.035(4) 0.055(4) -0.017(3) 0.006(3) -0.013(3) 
C164 0.044(4) 0.038(4) 0.037(4) -0.009(3) 0.005(3) -0.003(3) 
C165 0.038(4) 0.027(3) 0.049(4) -0.013(3) 0.006(3) -0.007(3) 
C166 0.047(4) 0.048(4) 0.045(4) -0.019(3) 0.006(3) -0.020(3) 
C167 0.049(4) 0.039(4) 0.040(4) -0.017(3) 0.004(3) -0.011(3) 
C168 0.039(4) 0.030(3) 0.046(4) -0.010(3) 0.003(3) -0.006(3) 
C169 0.039(4) 0.042(4) 0.051(5) -0.014(3) 0.001(3) -0.016(3) 
C170 0.050(4) 0.042(4) 0.041(4) -0.011(3) -0.005(3) -0.014(3) 
C171 0.037(4) 0.034(4) 0.053(5) -0.016(3) 0.009(3) -0.006(3) 
C172 0.038(4) 0.038(4) 0.039(4) -0.016(3) 0.008(3) -0.015(3) 
C173 0.045(4) 0.040(4) 0.050(4) -0.023(3) 0.001(3) -0.009(3) 
C174 0.040(4) 0.044(4) 0.050(4) -0.019(3) 0.002(3) -0.016(3) 
C175 0.049(4) 0.039(4) 0.047(4) -0.021(3) 0.014(3) -0.019(3) 
C176 0.081(5) 0.049(5) 0.047(5) -0.024(4) 0.003(4) -0.027(4) 
C177 0.061(5) 0.038(4) 0.046(4) -0.014(3) -0.006(3) -0.012(4) 
C178 0.059(5) 0.038(4) 0.064(5) -0.028(4) 0.021(4) -0.020(4) 
C179 0.044(4) 0.035(4) 0.037(4) -0.019(3) 0.004(3) -0.008(3) 
C180 0.032(4) 0.046(4) 0.046(4) -0.018(3) 0.004(3) -0.007(3) 
C181 0.049(5) 0.049(4) 0.037(4) -0.017(3) 0.009(3) -0.022(4) 
C182 0.038(4) 0.032(3) 0.042(4) -0.015(3) 0.002(3) -0.014(3) 
C183 0.036(4) 0.042(4) 0.050(4) -0.020(3) 0.002(3) -0.006(3) 
C184 0.041(4) 0.043(4) 0.046(4) -0.019(3) 0.009(3) -0.007(3) 
C185 0.046(4) 0.036(4) 0.053(5) -0.023(3) 0.003(4) -0.013(3) 
C186 0.036(4) 0.040(4) 0.038(4) -0.017(3) 0.006(3) -0.004(3) 
C187 0.040(4) 0.037(4) 0.045(4) -0.015(3) 0.007(3) -0.012(3) 
C188 0.036(4) 0.039(4) 0.050(4) -0.022(3) 0.006(3) -0.003(3) 
C189 0.035(4) 0.035(4) 0.036(4) -0.011(3) 0.003(3) -0.001(3) 
C190 0.053(4) 0.041(4) 0.039(4) -0.012(3) 0.010(3) -0.012(3) 
C191 0.056(4) 0.038(4) 0.046(4) -0.019(3) 0.010(3) -0.018(3) 
C192 0.037(4) 0.041(4) 0.042(4) -0.013(3) 0.010(3) -0.001(3) 
C193 0.053(4) 0.053(4) 0.043(4) -0.028(3) 0.008(3) -0.002(4) 
C194 0.051(4) 0.042(4) 0.050(4) -0.023(3) 0.010(3) -0.002(3) 
C195 0.051(4) 0.043(4) 0.051(4) -0.025(3) 0.001(3) -0.009(3) 
C196 0.045(4) 0.049(4) 0.051(4) -0.025(3) 0.005(3) -0.014(3) 
C197 0.054(5) 0.058(5) 0.050(4) -0.028(4) 0.004(3) -0.013(4) 
C198 0.054(4) 0.054(4) 0.044(4) -0.024(3) 0.007(3) -0.004(4) 
C199 0.042(4) 0.047(4) 0.034(4) -0.014(3) 0.002(3) -0.009(3) 
C200 0.045(4) 0.045(4) 0.037(4) -0.014(3) 0.003(3) -0.010(3) 
C201 0.059(5) 0.041(4) 0.042(4) -0.015(3) 0.019(3) -0.010(3) 
C202 0.052(4) 0.047(4) 0.048(4) -0.014(3) 0.020(3) -0.012(4) 
C203 0.050(4) 0.044(4) 0.045(4) -0.009(3) 0.009(3) -0.017(3) 
C204 0.071(5) 0.034(4) 0.045(4) -0.008(3) -0.004(4) -0.018(4) 
C205 0.047(4) 0.042(4) 0.051(4) -0.012(3) 0.003(3) -0.016(3) 
C206 0.064(5) 0.035(4) 0.052(4) -0.006(3) 0.004(4) -0.015(4) 
C207 0.042(4) 0.043(4) 0.044(4) -0.018(3) 0.004(3) -0.015(3) 
C208 0.040(4) 0.046(4) 0.054(4) -0.023(3) 0.006(3) -0.014(3) 
C209 0.044(4) 0.042(4) 0.057(4) -0.019(3) 0.007(3) -0.015(3) 
C210 0.045(4) 0.049(4) 0.052(4) -0.023(3) 0.013(3) -0.021(3) 
C211 0.084(6) 0.063(5) 0.069(6) -0.025(5) -0.026(5) 0.022(5) 
C212 0.073(6) 0.090(6) 0.086(6) -0.051(5) -0.025(5) 0.024(5) 
C213 0.053(5) 0.040(4) 0.067(5) -0.015(4) -0.017(4) 0.003(3) 
C214 0.061(5) 0.045(4) 0.067(5) -0.005(4) -0.012(4) -0.008(4) 
C215 0.045(5) 0.055(5) 0.114(7) -0.050(5) -0.017(5) 0.009(4) 
C216 0.051(5) 0.049(5) 0.108(7) -0.036(5) 0.017(4) -0.006(4) 
N41 0.055(4) 0.038(3) 0.040(3) -0.015(3) 0.005(3) -0.018(3) 
N42 0.075(5) 0.049(4) 0.055(4) -0.025(3) 0.024(3) -0.010(3) 
N43 0.053(4) 0.033(3) 0.043(3) -0.017(3) 0.002(3) -0.001(3) 
N44 0.047(3) 0.037(3) 0.048(3) -0.016(3) 0.003(3) -0.012(3) 
N45 0.056(4) 0.045(4) 0.056(4) -0.009(3) -0.011(3) -0.010(3) 
N46 0.041(3) 0.033(3) 0.049(3) -0.021(3) 0.000(3) -0.006(3) 
N47 0.040(3) 0.036(3) 0.042(3) -0.015(2) 0.000(2) -0.009(3) 
N48 0.060(4) 0.067(4) 0.054(4) -0.029(3) 0.016(3) -0.024(3) 
N49 0.067(4) 0.067(4) 0.054(4) -0.024(3) 0.014(3) -0.033(4) 
N50 0.049(4) 0.053(4) 0.058(4) -0.026(3) 0.002(3) -0.012(3) 
N51 0.081(5) 0.048(4) 0.074(5) -0.016(4) -0.017(4) 0.002(4) 
N52 0.049(4) 0.047(4) 0.057(4) -0.027(3) 0.009(3) -0.010(3) 
N53 0.063(4) 0.043(4) 0.045(3) -0.019(3) 0.004(3) -0.007(3) 
N54 0.048(4) 0.031(3) 0.047(3) -0.016(3) 0.002(3) -0.003(3) 
N55 0.043(3) 0.046(4) 0.039(3) -0.015(3) 0.007(3) -0.013(3) 
N56 0.045(3) 0.038(3) 0.044(3) -0.016(3) 0.004(3) -0.006(3) 
N57 0.047(3) 0.037(3) 0.049(3) -0.021(3) -0.005(3) -0.005(3) 
N58 0.068(4) 0.082(5) 0.046(4) -0.029(4) 0.012(3) -0.024(4) 
N59 0.070(4) 0.056(4) 0.067(5) -0.026(4) 0.019(4) -0.020(3) 
N60 0.063(4) 0.049(4) 0.055(4) -0.026(3) 0.009(3) -0.024(3) 
C217 0.052(5) 0.038(4) 0.046(4) -0.023(3) 0.008(4) -0.009(3) 
C218 0.052(4) 0.029(4) 0.039(4) -0.007(3) 0.004(3) -0.005(3) 
C219 0.052(4) 0.048(4) 0.051(4) -0.022(4) 0.009(3) -0.013(4) 
C220 0.061(5) 0.039(4) 0.045(4) -0.017(3) 0.006(4) -0.019(4) 
C221 0.074(5) 0.033(4) 0.051(4) -0.010(3) 0.007(4) -0.016(4) 
C222 0.058(5) 0.044(4) 0.051(4) -0.017(4) 0.001(4) -0.011(4) 
C223 0.077(6) 0.040(4) 0.041(4) -0.011(3) 0.002(4) -0.023(4) 
C224 0.052(4) 0.026(3) 0.043(4) -0.013(3) 0.007(4) -0.004(3) 
C225 0.053(4) 0.035(4) 0.045(4) -0.017(3) 0.014(4) -0.014(3) 
C226 0.059(5) 0.039(4) 0.039(4) -0.019(3) 0.012(4) -0.011(3) 
C227 0.057(5) 0.035(4) 0.044(4) -0.016(3) 0.013(4) -0.013(3) 
C228 0.047(4) 0.044(4) 0.044(4) -0.015(3) 0.006(4) -0.011(3) 
C229 0.051(4) 0.037(4) 0.034(4) -0.012(3) 0.012(3) -0.011(3) 
C230 0.057(5) 0.039(4) 0.047(4) -0.018(3) 0.016(4) -0.015(3) 
C231 0.047(4) 0.033(4) 0.038(4) -0.013(3) 0.007(3) -0.008(3) 
C232 0.046(4) 0.045(4) 0.041(4) -0.021(3) 0.005(3) -0.013(3) 
C233 0.038(4) 0.038(4) 0.045(4) -0.018(3) 0.005(3) -0.010(3) 
C234 0.037(4) 0.040(4) 0.048(4) -0.023(3) 0.008(3) -0.012(3) 
C235 0.046(4) 0.043(4) 0.047(4) -0.024(3) 0.011(3) -0.016(3) 
C236 0.052(4) 0.035(4) 0.048(4) -0.019(3) 0.012(3) -0.011(3) 
C237 0.040(4) 0.050(5) 0.041(4) -0.019(3) 0.006(3) -0.017(3) 
C238 0.076(6) 0.047(4) 0.050(4) -0.018(4) 0.022(4) -0.017(4) 
C239 0.055(5) 0.052(4) 0.046(4) -0.014(4) 0.009(4) -0.007(4) 
C240 0.076(6) 0.044(4) 0.050(4) -0.018(4) 0.010(4) -0.011(4) 
C241 0.069(5) 0.038(4) 0.051(4) -0.019(3) 0.021(4) -0.016(4) 
C242 0.086(6) 0.052(5) 0.084(6) -0.040(4) 0.038(5) -0.029(4) 
C243 0.094(7) 0.042(4) 0.093(6) -0.036(4) 0.047(5) -0.031(5) 
C244 0.070(5) 0.054(5) 0.050(5) -0.021(4) 0.014(4) -0.016(4) 
C245 0.067(5) 0.039(4) 0.057(5) -0.018(4) 0.015(4) -0.005(4) 
C246 0.071(6) 0.047(5) 0.070(6) -0.024(4) 0.020(5) 0.001(4) 
C247 0.067(5) 0.055(5) 0.065(5) -0.022(4) 0.008(4) -0.002(4) 
C248 0.062(5) 0.050(5) 0.060(5) -0.025(4) 0.023(4) -0.017(4) 
C249 0.081(6) 0.042(4) 0.063(5) -0.014(4) 0.014(5) -0.008(4) 
C250 0.082(6) 0.047(5) 0.049(5) -0.010(4) 0.011(4) -0.008(4) 
C251 0.072(6) 0.041(4) 0.066(6) -0.014(4) 0.019(5) -0.016(4) 
C252 0.070(6) 0.046(4) 0.060(6) -0.023(4) 0.014(5) 0.001(4) 
C253 0.092(6) 0.045(4) 0.041(4) -0.012(3) 0.012(4) -0.022(4) 
C254 0.084(6) 0.051(5) 0.045(5) -0.017(4) 0.014(4) -0.026(4) 
C255 0.073(6) 0.049(4) 0.044(5) -0.015(4) 0.007(4) 0.007(4) 
C256 0.074(6) 0.086(6) 0.049(5) -0.017(4) 0.006(5) 0.019(5) 
C257 0.075(7) 0.081(6) 0.050(6) -0.009(4) 0.019(5) -0.004(5) 
C258 0.069(6) 0.053(5) 0.061(5) -0.025(4) -0.009(5) 0.018(4) 
C259 0.050(4) 0.046(4) 0.047(4) -0.025(4) 0.011(3) -0.014(3) 
C260 0.057(5) 0.046(4) 0.044(4) -0.020(3) 0.002(3) -0.009(3) 
C261 0.051(4) 0.052(5) 0.060(5) -0.034(4) 0.010(4) -0.013(4) 
C262 0.070(5) 0.062(5) 0.047(5) -0.026(4) 0.009(4) -0.017(4) 
C263 0.091(6) 0.048(5) 0.044(5) -0.014(4) 0.006(4) -0.013(4) 
C264 0.067(5) 0.041(4) 0.047(5) -0.020(4) 0.009(4) -0.014(4) 
C265 0.068(5) 0.074(6) 0.046(5) -0.026(4) 0.001(4) -0.010(4) 
C266 0.043(4) 0.036(4) 0.036(4) -0.014(3) 0.000(3) -0.010(3) 
C267 0.044(4) 0.042(4) 0.043(4) -0.018(3) 0.004(3) -0.015(3) 
C268 0.049(4) 0.037(4) 0.045(4) -0.021(3) 0.006(3) -0.010(3) 
C269 0.046(4) 0.031(3) 0.036(4) -0.012(3) 0.002(3) -0.010(3) 
C270 0.043(4) 0.061(5) 0.061(5) -0.038(4) -0.001(3) -0.007(4) 
C271 0.041(4) 0.058(5) 0.058(5) -0.028(4) -0.001(3) -0.004(4) 
C272 0.057(5) 0.038(4) 0.047(4) -0.015(3) 0.005(3) -0.018(4) 
C273 0.055(5) 0.043(4) 0.043(4) -0.022(3) 0.012(3) -0.011(4) 
C274 0.040(4) 0.050(5) 0.054(4) -0.023(4) 0.007(3) -0.007(4) 
C275 0.050(5) 0.039(4) 0.049(4) -0.009(3) 0.010(3) -0.013(4) 
C276 0.041(4) 0.043(4) 0.047(4) -0.024(3) 0.005(3) -0.006(3) 
C277 0.037(4) 0.052(5) 0.061(5) -0.029(4) 0.012(3) -0.009(4) 
C278 0.047(5) 0.035(4) 0.059(4) -0.019(3) 0.017(4) -0.006(3) 
C279 0.040(4) 0.044(4) 0.054(4) -0.025(4) 0.004(3) -0.006(3) 
C280 0.041(4) 0.046(4) 0.043(4) -0.020(4) 0.004(3) -0.010(3) 
C281 0.049(4) 0.040(4) 0.043(4) -0.017(3) 0.000(3) -0.011(3) 
C282 0.053(5) 0.045(4) 0.040(4) -0.019(3) 0.001(3) -0.005(3) 
C283 0.042(4) 0.037(4) 0.042(4) -0.021(3) 0.009(3) -0.007(3) 
C284 0.045(4) 0.046(4) 0.047(4) -0.023(4) 0.002(3) -0.011(3) 
C285 0.054(5) 0.037(4) 0.044(4) -0.013(3) -0.002(3) -0.006(3) 
C286 0.047(4) 0.049(4) 0.046(4) -0.029(4) 0.012(3) -0.013(4) 
C287 0.052(4) 0.034(4) 0.043(4) -0.015(3) -0.005(3) -0.006(3) 
C288 0.051(4) 0.038(4) 0.041(4) -0.017(3) 0.003(3) -0.013(3) 
C289 0.051(4) 0.047(4) 0.051(4) -0.022(4) 0.005(3) -0.013(4) 
C290 0.046(4) 0.047(4) 0.049(4) -0.022(4) 0.001(3) -0.011(3) 
C291 0.055(5) 0.043(4) 0.047(4) -0.013(3) 0.004(4) -0.005(4) 
C292 0.051(5) 0.051(5) 0.053(4) -0.020(4) 0.013(4) -0.009(4) 
C293 0.054(4) 0.033(4) 0.049(4) -0.014(3) -0.002(4) -0.006(3) 
C294 0.046(4) 0.045(4) 0.040(4) -0.021(3) 0.006(3) -0.008(3) 
C295 0.056(5) 0.035(4) 0.044(4) -0.019(3) 0.000(3) -0.005(3) 
C296 0.047(4) 0.046(4) 0.039(4) -0.015(3) 0.002(3) -0.013(3) 
C297 0.051(4) 0.049(4) 0.043(4) -0.018(3) 0.004(3) -0.006(4) 
C298 0.059(5) 0.048(4) 0.056(5) -0.026(4) 0.009(4) -0.014(4) 
C299 0.058(5) 0.057(5) 0.047(4) -0.025(4) 0.012(4) -0.021(4) 
C300 0.061(5) 0.040(4) 0.043(4) -0.018(3) -0.001(4) 0.001(4) 
C301 0.068(5) 0.076(5) 0.061(5) -0.033(4) 0.018(4) -0.038(4) 
C302 0.090(6) 0.078(6) 0.064(5) -0.026(4) 0.025(5) -0.053(5) 
C303 0.085(6) 0.044(5) 0.089(6) -0.008(4) -0.015(5) -0.009(4) 
C304 0.106(8) 0.046(5) 0.098(7) -0.028(5) -0.041(6) 0.007(5) 
C305 0.055(5) 0.053(5) 0.068(5) -0.021(4) 0.006(4) -0.015(4) 
C306 0.049(4) 0.049(4) 0.052(4) -0.019(4) -0.003(4) -0.004(3) 
C307 0.056(4) 0.032(4) 0.052(4) -0.016(3) 0.003(3) 0.000(3) 
C308 0.065(5) 0.046(4) 0.052(4) -0.021(4) -0.001(4) 0.000(4) 
C309 0.049(4) 0.032(4) 0.056(4) -0.023(3) -0.005(3) 0.000(3) 
C310 0.048(4) 0.042(4) 0.053(4) -0.023(3) 0.009(3) -0.010(3) 
C311 0.047(4) 0.039(4) 0.057(4) -0.023(3) 0.007(3) -0.010(3) 
C312 0.057(5) 0.039(4) 0.058(4) -0.023(3) 0.005(4) -0.009(4) 
C313 0.052(4) 0.042(4) 0.039(4) -0.015(3) 0.007(3) -0.014(3) 
C314 0.047(4) 0.044(4) 0.048(4) -0.019(3) 0.011(3) -0.010(3) 
C315 0.052(4) 0.036(4) 0.048(4) -0.012(3) 0.007(3) -0.012(3) 
C316 0.051(4) 0.037(4) 0.063(5) -0.022(3) 0.001(4) -0.010(3) 
C317 0.050(4) 0.041(4) 0.046(4) -0.022(3) 0.006(3) -0.013(3) 
C318 0.044(4) 0.047(4) 0.038(4) -0.017(3) 0.002(3) -0.007(3) 
C319 0.081(6) 0.064(5) 0.058(5) -0.032(4) 0.020(4) -0.027(4) 
C320 0.083(6) 0.053(5) 0.049(4) -0.024(4) 0.017(4) -0.027(4) 
C321 0.073(6) 0.062(5) 0.049(5) -0.018(4) 0.012(4) -0.015(4) 
C322 0.079(6) 0.066(5) 0.057(5) -0.022(4) 0.022(4) -0.022(4) 
C323 0.068(5) 0.085(6) 0.052(5) -0.033(4) 0.007(4) -0.030(5) 
C324 0.067(5) 0.105(7) 0.049(5) -0.037(5) 0.010(4) -0.023(5) 
N61 0.048(4) 0.043(3) 0.042(3) -0.008(3) 0.006(3) -0.010(3) 
N62 0.054(4) 0.030(3) 0.049(3) -0.016(3) 0.006(3) -0.010(3) 
N63 0.063(4) 0.065(4) 0.075(5) -0.033(4) 0.015(4) -0.012(4) 
N64 0.062(4) 0.063(4) 0.043(3) -0.023(3) 0.009(3) -0.022(3) 
N65 0.068(6) 0.110(7) 0.107(7) -0.006(6) 0.007(5) -0.048(5) 
N66 0.049(4) 0.054(4) 0.062(4) -0.010(3) -0.002(3) -0.001(3) 
N67 0.208(10) 0.048(4) 0.059(5) -0.031(4) 0.051(6) -0.044(6) 
N68 0.102(5) 0.044(4) 0.044(4) -0.011(3) 0.008(4) -0.022(4) 
N69 0.090(6) 0.164(8) 0.067(5) -0.004(5) 0.000(4) -0.076(6) 
N70 0.081(7) 0.089(7) 0.290(15) -0.006(8) 0.036(8) -0.038(6) 
N71 0.080(5) 0.073(4) 0.055(4) -0.025(3) 0.013(4) -0.042(4) 
N72 0.055(4) 0.049(4) 0.076(4) -0.019(3) -0.002(3) -0.004(3) 
N73 0.095(6) 0.084(6) 0.082(6) -0.015(4) 0.003(5) -0.050(5) 
N74 0.057(4) 0.069(5) 0.061(4) -0.019(4) 0.001(3) -0.003(4) 
N75 0.171(8) 0.051(4) 0.045(4) -0.022(4) 0.013(4) -0.025(5) 
N76 0.149(7) 0.057(4) 0.064(5) -0.027(4) 0.047(5) -0.047(4) 
N77 0.165(8) 0.064(5) 0.085(6) -0.026(5) 0.040(6) -0.042(5) 
N78 0.078(4) 0.042(4) 0.051(4) -0.021(3) 0.013(3) -0.020(3) 
N79 0.096(5) 0.091(5) 0.070(5) -0.045(4) 0.021(4) -0.047(5) 
N80 0.142(7) 0.055(4) 0.049(4) -0.012(3) -0.001(4) -0.039(5) 
C325 0.058(5) 0.039(4) 0.038(4) -0.014(3) 0.008(3) -0.013(4) 
C326 0.065(5) 0.049(5) 0.049(4) -0.015(4) 0.023(4) -0.013(4) 
C327 0.062(6) 0.059(5) 0.063(5) -0.005(4) 0.014(4) -0.008(4) 
C328 0.062(6) 0.072(6) 0.055(5) -0.010(4) 0.016(4) -0.028(5) 
C329 0.072(6) 0.053(5) 0.051(5) -0.010(4) 0.005(4) -0.026(4) 
C330 0.061(5) 0.047(4) 0.043(4) -0.009(3) 0.010(4) -0.014(4) 
C331 0.076(7) 0.125(9) 0.067(6) 0.005(6) 0.004(5) -0.037(6) 
C332 0.050(4) 0.044(4) 0.050(5) -0.014(4) 0.013(4) -0.017(4) 
C333 0.059(5) 0.047(4) 0.049(5) -0.017(4) 0.013(4) -0.003(4) 
C334 0.062(5) 0.059(5) 0.043(4) -0.016(4) 0.003(4) -0.008(4) 
C335 0.051(4) 0.044(4) 0.050(5) -0.024(4) 0.005(4) -0.009(4) 
C336 0.058(5) 0.061(5) 0.056(5) -0.024(4) 0.007(4) 0.000(4) 
C337 0.071(5) 0.070(5) 0.049(5) -0.030(4) 0.011(4) -0.007(4) 
C338 0.056(5) 0.059(5) 0.055(5) -0.020(4) 0.000(4) -0.010(4) 
C339 0.055(4) 0.040(4) 0.048(5) -0.019(3) 0.015(4) -0.015(4) 
C340 0.080(6) 0.059(5) 0.049(5) -0.016(4) 0.005(4) -0.029(4) 
C341 0.090(6) 0.063(5) 0.072(6) -0.026(5) 0.019(5) -0.041(5) 
C342 0.082(6) 0.043(4) 0.039(5) -0.016(4) 0.018(4) -0.015(4) 
C343 0.070(5) 0.036(4) 0.050(4) -0.021(4) 0.016(4) -0.011(4) 
C344 0.057(4) 0.044(4) 0.038(4) -0.019(3) 0.004(3) -0.008(3) 
C345 0.123(7) 0.050(5) 0.064(6) -0.032(4) 0.037(5) -0.036(5) 
C346 0.057(5) 0.033(4) 0.043(4) -0.011(3) 0.009(4) -0.013(3) 
C347 0.048(4) 0.045(4) 0.052(4) -0.019(3) 0.007(4) -0.011(3) 
C348 0.058(5) 0.055(4) 0.043(4) -0.023(4) 0.011(4) -0.012(4) 
C349 0.061(5) 0.037(4) 0.044(4) -0.013(3) 0.008(4) -0.015(3) 
C350 0.058(5) 0.045(4) 0.049(4) -0.015(3) 0.013(4) -0.018(4) 
C351 0.063(5) 0.042(4) 0.046(4) -0.017(3) 0.014(4) -0.017(4) 
C352 0.070(5) 0.051(4) 0.047(4) -0.015(4) 0.005(4) -0.018(4) 
C353 0.053(4) 0.034(4) 0.046(4) -0.009(3) 0.010(4) -0.017(3) 
C354 0.066(5) 0.041(4) 0.047(4) -0.017(4) -0.005(4) -0.009(4) 
C355 0.058(5) 0.040(4) 0.053(5) -0.015(3) -0.002(4) -0.009(3) 
C356 0.058(5) 0.033(4) 0.046(4) -0.011(3) 0.016(4) -0.013(4) 
C357 0.062(5) 0.039(4) 0.044(4) -0.012(3) 0.004(4) -0.023(4) 
C358 0.054(4) 0.038(4) 0.043(4) -0.011(3) 0.007(3) -0.013(3) 
C359 0.066(5) 0.038(4) 0.052(5) -0.013(4) 0.015(4) -0.019(4) 
C360 0.054(5) 0.041(4) 0.046(4) -0.019(3) 0.008(3) -0.015(4) 
C361 0.064(5) 0.037(4) 0.072(5) -0.019(4) 0.016(4) -0.011(4) 
C362 0.056(5) 0.052(5) 0.085(6) -0.026(4) 0.018(4) -0.018(4) 
C363 0.052(5) 0.059(5) 0.051(4) -0.025(4) 0.009(4) -0.014(4) 
C364 0.056(5) 0.039(4) 0.045(4) -0.011(3) -0.001(3) -0.003(4) 
C365 0.054(5) 0.035(4) 0.045(4) -0.012(3) 0.004(3) -0.015(3) 
C366 0.047(5) 0.070(6) 0.056(5) -0.030(4) 0.008(4) -0.016(4) 
C367 0.059(5) 0.059(5) 0.096(7) -0.036(5) 0.014(5) -0.023(4) 
C368 0.135(9) 0.062(6) 0.105(7) -0.038(6) -0.019(6) -0.032(6) 
C369 0.140(10) 0.051(7) 0.146(10) -0.032(6) -0.030(8) -0.011(6) 
C370 0.070(6) 0.042(5) 0.165(10) -0.061(7) 0.021(6) -0.018(5) 
C371 0.047(5) 0.069(6) 0.107(7) -0.025(5) 0.018(5) -0.014(4) 
C372 0.049(5) 0.068(6) 0.093(7) -0.039(5) 0.009(5) -0.013(4) 
C373 0.123(10) 0.175(13) 0.082(8) -0.007(8) -0.028(7) -0.103(10) 
C374 0.056(5) 0.050(5) 0.075(6) -0.024(4) 0.005(4) -0.013(4) 
C375 0.057(5) 0.045(4) 0.065(5) -0.014(4) 0.003(4) -0.009(4) 
C376 0.069(5) 0.043(4) 0.058(5) -0.013(4) 0.002(4) -0.014(4) 
C377 0.053(5) 0.061(5) 0.054(5) -0.021(4) 0.000(4) -0.008(4) 
C378 0.087(6) 0.082(6) 0.090(6) -0.043(5) 0.024(5) -0.046(5) 
C379 0.091(6) 0.089(7) 0.081(6) -0.047(5) 0.036(5) -0.047(5) 
C380 0.055(5) 0.054(5) 0.055(5) -0.011(4) -0.005(4) -0.008(4) 
C381 0.069(6) 0.057(5) 0.071(6) -0.028(4) 0.017(5) -0.026(4) 
C382 0.073(6) 0.058(5) 0.101(7) -0.043(5) 0.032(5) -0.020(5) 
C383 0.106(8) 0.058(5) 0.080(7) -0.030(5) 0.043(6) -0.033(5) 
C384 0.102(7) 0.051(5) 0.069(6) -0.026(5) 0.024(5) -0.028(5) 
C385 0.086(6) 0.078(6) 0.061(6) -0.026(5) 0.016(5) -0.028(5) 
C386 0.069(6) 0.084(6) 0.066(6) -0.025(5) 0.018(5) -0.024(5) 
C387 0.137(8) 0.049(5) 0.074(6) -0.030(5) 0.032(6) -0.033(5) 
C388 0.051(4) 0.045(4) 0.049(4) -0.018(4) -0.001(3) -0.012(4) 
C389 0.091(6) 0.035(4) 0.048(5) -0.013(3) 0.002(4) -0.017(4) 
C390 0.085(6) 0.041(4) 0.054(5) -0.020(4) 0.008(4) -0.012(4) 
C391 0.080(5) 0.036(4) 0.051(5) -0.019(4) 0.006(4) -0.017(4) 
C392 0.100(6) 0.043(4) 0.051(5) -0.016(4) 0.007(4) -0.009(4) 
C393 0.090(6) 0.047(5) 0.055(5) -0.021(4) 0.001(4) -0.003(4) 
C394 0.126(7) 0.046(5) 0.047(5) -0.019(4) 0.013(5) -0.022(5) 
C395 0.063(5) 0.056(5) 0.057(5) -0.025(4) 0.003(4) -0.013(4) 
C396 0.070(5) 0.061(5) 0.053(5) -0.017(4) -0.001(4) -0.018(4) 
C397 0.073(6) 0.050(5) 0.047(4) -0.013(4) 0.005(4) -0.021(4) 
C398 0.095(7) 0.041(4) 0.056(5) -0.021(4) 0.008(4) -0.013(4) 
C399 0.064(5) 0.048(4) 0.061(5) -0.019(4) 0.006(4) -0.008(4) 
C400 0.058(5) 0.048(4) 0.044(4) -0.016(4) 0.000(4) -0.010(4) 
C401 0.106(7) 0.054(5) 0.045(5) -0.015(4) -0.003(4) -0.031(5) 
C402 0.063(5) 0.044(4) 0.052(5) -0.020(4) 0.012(4) -0.015(4) 
C403 0.096(6) 0.046(5) 0.055(5) -0.019(4) 0.005(4) -0.014(4) 
C404 0.114(8) 0.055(5) 0.071(6) -0.028(5) 0.034(6) -0.026(5) 
C405 0.077(6) 0.055(5) 0.091(7) -0.020(5) 0.029(5) -0.026(5) 
C406 0.063(5) 0.069(6) 0.090(7) -0.020(5) 0.000(5) -0.026(5) 
C407 0.062(5) 0.057(5) 0.069(5) -0.014(4) -0.006(4) -0.023(4) 
C408 0.127(10) 0.065(6) 0.131(9) -0.041(6) 0.069(8) -0.042(7) 
C409 0.095(8) 0.184(12) 0.072(7) -0.001(7) -0.001(6) -0.092(8) 
C410 0.078(7) 0.244(15) 0.083(7) 0.021(8) -0.012(6) -0.084(9) 
C411 0.095(8) 0.101(7) 0.081(7) -0.030(6) 0.029(5) -0.062(6) 
C412 0.079(6) 0.081(6) 0.060(5) -0.025(4) 0.005(4) -0.038(5) 
C413 0.055(7) 0.125(11) 0.233(16) 0.023(10) 0.010(8) -0.036(8) 
C414 0.105(10) 0.103(10) 0.40(3) -0.057(13) 0.118(13) -0.067(9) 
C415 0.062(5) 0.044(5) 0.081(6) -0.013(4) 0.000(4) -0.003(4) 
C416 0.060(5) 0.048(5) 0.083(6) -0.006(4) 0.000(4) -0.004(4) 
C417 0.058(5) 0.070(6) 0.071(6) -0.008(5) -0.001(4) 0.014(4) 
C418 0.050(5) 0.094(7) 0.065(5) -0.021(5) -0.012(4) 0.006(5) 
C419 0.046(5) 0.056(5) 0.084(6) -0.021(4) 0.002(4) -0.003(4) 
C420 0.061(5) 0.055(5) 0.095(7) -0.008(5) 0.017(5) 0.000(4) 
C421 0.239(13) 0.054(6) 0.055(6) -0.015(5) 0.066(7) -0.036(7) 
C422 0.184(11) 0.075(7) 0.076(6) -0.038(6) 0.072(7) -0.062(7) 
C423 0.217(13) 0.062(6) 0.072(6) -0.019(5) 0.055(7) -0.055(7) 
C424 0.188(11) 0.048(5) 0.067(6) -0.017(5) 0.020(6) -0.035(6) 
C425 0.250(15) 0.052(6) 0.044(6) -0.015(5) 0.029(8) -0.031(8) 
C426 0.216(12) 0.052(5) 0.049(5) -0.020(4) 0.025(6) -0.029(7) 
C427 0.093(6) 0.040(4) 0.049(4) -0.020(4) 0.012(4) -0.013(4) 
C428 0.080(6) 0.042(4) 0.065(5) -0.025(4) 0.013(4) -0.008(4) 
C429 0.095(7) 0.081(6) 0.057(5) -0.030(4) 0.010(5) -0.049(5) 
C430 0.089(6) 0.075(6) 0.073(6) -0.035(5) 0.005(5) -0.021(5) 
C431 0.132(8) 0.040(5) 0.062(5) -0.018(4) -0.003(5) -0.023(5) 
C432 0.171(9) 0.059(5) 0.042(5) -0.006(4) -0.002(5) -0.062(6) 
 
_geom_special_details 
; 
 All esds (except the esd in the dihedral angle between two l.s. planes) 
 are estimated using the full covariance matrix.  The cell esds are taken 
 into account individually in the estimation of esds in distances, angles 
 and torsion angles; correlations between esds in cell parameters are only 
 used when they are defined by crystal symmetry.  An approximate (isotropic) 
 treatment of cell esds is used for estimating esds involving l.s. planes. 
; 
 
loop_ 
 _geom_bond_atom_site_label_1 
 _geom_bond_atom_site_label_2 
 _geom_bond_distance 
 _geom_bond_site_symmetry_2 
 _geom_bond_publ_flag 
N1 C15 1.410(8) . ? 
N1 C1 1.420(8) . ? 
N1 C8 1.436(8) . ? 
N2 C22 1.412(8) . ? 
N2 C36 1.424(8) . ? 
N2 C29 1.432(8) . ? 
N3 C57 1.383(8) . ? 
N3 C50 1.425(8) . ? 
N3 C43 1.439(8) . ? 
N4 C64 1.420(7) . ? 
N4 C71 1.427(7) . ? 
N4 C78 1.430(8) . ? 
N5 C87 1.452(8) . ? 
N5 C89 1.457(8) . ? 
N5 C85 1.461(9) . ? 
N6 C93 1.472(8) . ? 
N6 C95 1.475(7) . ? 
N6 C91 1.479(8) . ? 
N7 C99 1.456(9) . ? 
N7 C97 1.456(10) . ? 
N7 C101 1.462(10) . ? 
N8 C103 1.464(7) . ? 
N8 C107 1.471(7) . ? 
N8 C105 1.476(7) . ? 
N9 C7 1.253(8) . ? 
N9 C86 1.470(8) . ? 
N10 C77 1.264(8) . ? 
N10 C90 1.461(8) . ? 
N11 C42 1.249(9) . ? 
N11 C88 1.472(9) . ? 
N12 C70 1.273(7) . ? 
N12 C96 1.467(8) . ? 
N13 C28 1.261(8) . ? 
N13 C92 1.460(8) . ? 
N14 C63 1.279(8) . ? 
N14 C94 1.447(8) . ? 
N15 C35 1.281(9) . ? 
N15 C100 1.481(9) . ? 
N16 C56 1.275(9) . ? 
N16 C102 1.469(9) . ? 
N17 C14 1.260(9) . ? 
N17 C98 1.484(9) . ? 
N18 C21 1.277(8) . ? 
N18 C104 1.468(7) . ? 
N19 C49 1.264(7) . ? 
N19 C106 1.470(8) . ? 
N20 C84 1.273(7) . ? 
N20 C108 1.465(8) . ? 
C1 C2 1.392(9) . ? 
C1 C6 1.393(9) . ? 
C2 C3 1.373(9) . ? 
C2 H2 0.9500 . ? 
C3 C4 1.401(9) . ? 
C3 H3 0.9500 . ? 
C4 C5 1.392(9) . ? 
C4 C7 1.481(9) . ? 
C5 C6 1.383(9) . ? 
C5 H5 0.9500 . ? 
C6 H6 0.9500 . ? 
C7 H7 0.9500 . ? 
C8 C9 1.370(9) . ? 
C8 C13 1.397(9) . ? 
C9 C10 1.412(10) . ? 
C9 H9 0.9500 . ? 
C10 C11 1.399(10) . ? 
C10 H10 0.9500 . ? 
C11 C12 1.353(9) . ? 
C11 C14 1.496(9) . ? 
C12 C13 1.371(9) . ? 
C12 H12 0.9500 . ? 
C13 H13 0.9500 . ? 
C14 H14 0.9500 . ? 
C15 C20 1.373(8) . ? 
C15 C16 1.405(9) . ? 
C16 C17 1.387(8) . ? 
C16 H16 0.9500 . ? 
C17 C18 1.398(8) . ? 
C17 H17 0.9500 . ? 
C18 C19 1.386(8) . ? 
C18 C21 1.456(9) . ? 
C19 C20 1.383(8) . ? 
C19 H19 0.9500 . ? 
C20 H20 0.9500 . ? 
C21 H21 0.9500 . ? 
C22 C27 1.390(9) . ? 
C22 C23 1.399(9) . ? 
C23 C24 1.390(9) . ? 
C23 H23 0.9500 . ? 
C24 C25 1.393(9) . ? 
C24 H24 0.9500 . ? 
C25 C26 1.394(9) . ? 
C25 C28 1.462(9) . ? 
C26 C27 1.398(9) . ? 
C26 H26 0.9500 . ? 
C27 H27 0.9500 . ? 
C28 H28 0.9500 . ? 
C29 C34 1.375(9) . ? 
C29 C30 1.388(9) . ? 
C30 C31 1.396(9) . ? 
C30 H30 0.9500 . ? 
C31 C32 1.403(9) . ? 
C31 H31 0.9500 . ? 
C32 C33 1.380(9) . ? 
C32 C35 1.490(10) . ? 
C33 C34 1.380(9) . ? 
C33 H33 0.9500 . ? 
C34 H34 0.9500 . ? 
C35 H35 0.9500 . ? 
C36 C37 1.374(9) . ? 
C36 C41 1.383(9) . ? 
C37 C38 1.399(9) . ? 
C37 H37 0.9500 . ? 
C38 C39 1.368(9) . ? 
C38 H38 0.9500 . ? 
C39 C40 1.369(10) . ? 
C39 C42 1.500(10) . ? 
C40 C41 1.398(10) . ? 
C40 H40 0.9500 . ? 
C41 H41 0.9500 . ? 
C42 H42 0.9500 . ? 
C43 C44 1.379(9) . ? 
C43 C48 1.403(9) . ? 
C44 C45 1.385(8) . ? 
C44 H44 0.9500 . ? 
C45 C46 1.394(8) . ? 
C45 H45 0.9500 . ? 
C46 C47 1.363(9) . ? 
C46 C49 1.462(9) . ? 
C47 C48 1.382(9) . ? 
C47 H47 0.9500 . ? 
C48 H48 0.9500 . ? 
C49 H49 0.9500 . ? 
C50 C51 1.389(9) . ? 
C50 C55 1.401(9) . ? 
C51 C52 1.377(9) . ? 
C51 H51 0.9500 . ? 
C52 C53 1.409(9) . ? 
C52 H52 0.9500 . ? 
C53 C54 1.384(9) . ? 
C53 C56 1.465(10) . ? 
C54 C55 1.384(9) . ? 
C54 H54 0.9500 . ? 
C55 H55 0.9500 . ? 
C56 H56 0.9500 . ? 
C57 C62 1.386(9) . ? 
C57 C58 1.413(9) . ? 
C58 C59 1.379(9) . ? 
C58 H58 0.9500 . ? 
C59 C60 1.376(9) . ? 
C59 H59 0.9500 . ? 
C60 C61 1.397(9) . ? 
C60 C63 1.449(9) . ? 
C61 C62 1.392(8) . ? 
C61 H61 0.9500 . ? 
C62 H62 0.9500 . ? 
C63 H63 0.9500 . ? 
C64 C69 1.377(8) . ? 
C64 C65 1.386(8) . ? 
C65 C66 1.383(8) . ? 
C65 H65 0.9500 . ? 
C66 C67 1.381(8) . ? 
C66 H66 0.9500 . ? 
C67 C68 1.389(8) . ? 
C67 C70 1.460(8) . ? 
C68 C69 1.380(8) . ? 
C68 H68 0.9500 . ? 
C69 H69 0.9500 . ? 
C70 H70 0.9500 . ? 
C71 C76 1.364(8) . ? 
C71 C72 1.373(8) . ? 
C72 C73 1.384(8) . ? 
C72 H72 0.9500 . ? 
C73 C74 1.374(8) . ? 
C73 H73 0.9500 . ? 
C74 C75 1.379(9) . ? 
C74 C77 1.476(9) . ? 
C75 C76 1.397(9) . ? 
C75 H75 0.9500 . ? 
C76 H76 0.9500 . ? 
C77 H77 0.9500 . ? 
C78 C83 1.390(8) . ? 
C78 C79 1.400(8) . ? 
C79 C80 1.360(8) . ? 
C79 H79 0.9500 . ? 
C80 C81 1.393(8) . ? 
C80 H80 0.9500 . ? 
C81 C82 1.387(8) . ? 
C81 C84 1.462(9) . ? 
C82 C83 1.372(8) . ? 
C82 H82 0.9500 . ? 
C83 H83 0.9500 . ? 
C84 H84 0.9500 . ? 
C85 C86 1.510(9) . ? 
C85 H85A 0.9900 . ? 
C85 H85B 0.9900 . ? 
C86 H86A 0.9900 . ? 
C86 H86B 0.9900 . ? 
C87 C88 1.501(10) . ? 
C87 H87A 0.9900 . ? 
C87 H87B 0.9900 . ? 
C88 H88A 0.9900 . ? 
C88 H88B 0.9900 . ? 
C89 C90 1.524(9) . ? 
C89 H89A 0.9900 . ? 
C89 H89B 0.9900 . ? 
C90 H90A 0.9900 . ? 
C90 H90B 0.9900 . ? 
C91 C92 1.516(9) . ? 
C91 H91A 0.9900 . ? 
C91 H91B 0.9900 . ? 
C92 H92A 0.9900 . ? 
C92 H92B 0.9900 . ? 
C93 C94 1.494(9) . ? 
C93 H93A 0.9900 . ? 
C93 H93B 0.9900 . ? 
C94 H94A 0.9900 . ? 
C94 H94B 0.9900 . ? 
C95 C96 1.519(8) . ? 
C95 H95A 0.9900 . ? 
C95 H95B 0.9900 . ? 
C96 H96A 0.9900 . ? 
C96 H96B 0.9900 . ? 
C97 C98 1.537(11) . ? 
C97 H97A 0.9900 . ? 
C97 H97B 0.9900 . ? 
C98 H98A 0.9900 . ? 
C98 H98B 0.9900 . ? 
C99 C100 1.494(10) . ? 
C99 H99A 0.9900 . ? 
C99 H99B 0.9900 . ? 
C100 H10A 0.9900 . ? 
C100 H10B 0.9900 . ? 
C101 C102 1.514(11) . ? 
C101 H10C 0.9900 . ? 
C101 H10D 0.9900 . ? 
C102 H10E 0.9900 . ? 
C102 H10F 0.9900 . ? 
C103 C104 1.504(8) . ? 
C103 H10G 0.9900 . ? 
C103 H10H 0.9900 . ? 
C104 H10I 0.9900 . ? 
C104 H10J 0.9900 . ? 
C105 C106 1.511(8) . ? 
C105 H10K 0.9900 . ? 
C105 H10L 0.9900 . ? 
C106 H10M 0.9900 . ? 
C106 H10N 0.9900 . ? 
C107 C108 1.505(8) . ? 
C107 H10O 0.9900 . ? 
C107 H10P 0.9900 . ? 
C108 H10Q 0.9900 . ? 
C108 H10R 0.9900 . ? 
N21 C109 1.419(8) . ? 
N21 C123 1.423(8) . ? 
N21 C116 1.425(8) . ? 
N22 C144 1.418(7) . ? 
N22 C137 1.428(7) . ? 
N22 C130 1.433(7) . ? 
N23 C151 1.402(8) . ? 
N23 C165 1.424(7) . ? 
N23 C158 1.434(7) . ? 
N24 C172 1.403(7) . ? 
N24 C179 1.427(7) . ? 
N24 C186 1.444(7) . ? 
N25 C195 1.469(8) . ? 
N25 C193 1.474(7) . ? 
N25 C197 1.478(8) . ? 
N26 C199 1.462(7) . ? 
N26 C201 1.466(7) . ? 
N26 C203 1.476(7) . ? 
N27 C207 1.454(7) . ? 
N27 C205 1.469(7) . ? 
N27 C209 1.472(8) . ? 
N28 C215 1.452(9) . ? 
N28 C211 1.466(9) . ? 
N28 C213 1.471(8) . ? 
N29 C115 1.255(8) . ? 
N29 C194 1.475(8) . ? 
N30 C192 1.268(8) . ? 
N30 C198 1.478(8) . ? 
N31 C150 1.266(7) . ? 
N31 C196 1.466(7) . ? 
N32 C185 1.266(7) . ? 
N32 C204 1.455(8) . ? 
N33 C136 1.252(7) . ? 
N33 C200 1.469(7) . ? 
N34 C171 1.260(7) . ? 
N34 C202 1.479(7) . ? 
N35 C122 1.269(7) . ? 
N35 C206 1.452(8) . ? 
N36 C143 1.262(7) . ? 
N36 C210 1.459(7) . ? 
N37 C164 1.258(7) . ? 
N37 C208 1.452(8) . ? 
N38 C129 1.254(9) . ? 
N38 C212 1.492(10) . ? 
N39 C178 1.259(8) . ? 
N39 C216 1.466(8) . ? 
N40 C157 1.268(8) . ? 
N40 C214 1.467(8) . ? 
C109 C114 1.375(9) . ? 
C109 C110 1.389(9) . ? 
C110 C111 1.379(8) . ? 
C110 H110 0.9500 . ? 
C111 C112 1.388(8) . ? 
C111 H111 0.9500 . ? 
C112 C113 1.382(9) . ? 
C112 C115 1.482(9) . ? 
C113 C114 1.401(9) . ? 
C113 H113 0.9500 . ? 
C114 H114 0.9500 . ? 
C115 H115 0.9500 . ? 
C116 C121 1.378(9) . ? 
C116 C117 1.393(8) . ? 
C117 C118 1.361(9) . ? 
C117 H117 0.9500 . ? 
C118 C119 1.373(8) . ? 
C118 H118 0.9500 . ? 
C119 C120 1.391(8) . ? 
C119 C122 1.473(9) . ? 
C120 C121 1.370(9) . ? 
C120 H120 0.9500 . ? 
C121 H121 0.9500 . ? 
C122 H122 0.9500 . ? 
C123 C128 1.377(9) . ? 
C123 C124 1.392(9) . ? 
C124 C125 1.379(9) . ? 
C124 H124 0.9500 . ? 
C125 C126 1.387(10) . ? 
C125 H125 0.9500 . ? 
C126 C127 1.387(10) . ? 
C126 C129 1.472(10) . ? 
C127 C128 1.386(9) . ? 
C127 H127 0.9500 . ? 
C128 H128 0.9500 . ? 
C129 H129 0.9500 . ? 
C130 C131 1.385(8) . ? 
C130 C135 1.389(8) . ? 
C131 C132 1.382(8) . ? 
C131 H131 0.9500 . ? 
C132 C133 1.398(8) . ? 
C132 H132 0.9500 . ? 
C133 C134 1.389(8) . ? 
C133 C136 1.477(8) . ? 
C134 C135 1.370(8) . ? 
C134 H134 0.9500 . ? 
C135 H135 0.9500 . ? 
C136 H136 0.9500 . ? 
C137 C142 1.382(8) . ? 
C137 C138 1.397(8) . ? 
C138 C139 1.384(8) . ? 
C138 H138 0.9500 . ? 
C139 C140 1.377(8) . ? 
C139 H139 0.9500 . ? 
C140 C141 1.394(8) . ? 
C140 C143 1.478(8) . ? 
C141 C142 1.391(8) . ? 
C141 H141 0.9500 . ? 
C142 H142 0.9500 . ? 
C143 H143 0.9500 . ? 
C144 C145 1.386(8) . ? 
C144 C149 1.398(8) . ? 
C145 C146 1.374(8) . ? 
C145 H145 0.9500 . ? 
C146 C147 1.393(8) . ? 
C146 H146 0.9500 . ? 
C147 C148 1.381(8) . ? 
C147 C150 1.472(8) . ? 
C148 C149 1.379(8) . ? 
C148 H148 0.9500 . ? 
C149 H149 0.9500 . ? 
C150 H150 0.9500 . ? 
C151 C156 1.373(8) . ? 
C151 C152 1.388(8) . ? 
C152 C153 1.408(9) . ? 
C152 H152 0.9500 . ? 
C153 C154 1.380(9) . ? 
C153 H153 0.9500 . ? 
C154 C155 1.388(9) . ? 
C154 C157 1.471(9) . ? 
C155 C156 1.397(9) . ? 
C155 H155 0.9500 . ? 
C156 H156 0.9500 . ? 
C157 H157 0.9500 . ? 
C158 C163 1.382(8) . ? 
C158 C159 1.383(8) . ? 
C159 C160 1.372(8) . ? 
C159 H159 0.9500 . ? 
C160 C161 1.419(8) . ? 
C160 H160 0.9500 . ? 
C161 C162 1.386(8) . ? 
C161 C164 1.474(8) . ? 
C162 C163 1.374(8) . ? 
C162 H162 0.9500 . ? 
C163 H163 0.9500 . ? 
C164 H164 0.9500 . ? 
C165 C170 1.374(8) . ? 
C165 C166 1.390(8) . ? 
C166 C167 1.384(8) . ? 
C166 H166 0.9500 . ? 
C167 C168 1.394(8) . ? 
C167 H167 0.9500 . ? 
C168 C169 1.381(8) . ? 
C168 C171 1.479(8) . ? 
C169 C170 1.391(8) . ? 
C169 H169 0.9500 . ? 
C170 H170 0.9500 . ? 
C171 H171 0.9500 . ? 
C172 C177 1.384(8) . ? 
C172 C173 1.390(8) . ? 
C173 C174 1.388(8) . ? 
C173 H173 0.9500 . ? 
C174 C175 1.388(8) . ? 
C174 H174 0.9500 . ? 
C175 C176 1.386(9) . ? 
C175 C178 1.481(9) . ? 
C176 C177 1.368(9) . ? 
C176 H176 0.9500 . ? 
C177 H177 0.9500 . ? 
C178 H178 0.9500 . ? 
C179 C184 1.381(8) . ? 
C179 C180 1.393(8) . ? 
C180 C181 1.371(8) . ? 
C180 H180 0.9500 . ? 
C181 C182 1.388(8) . ? 
C181 H181 0.9500 . ? 
C182 C183 1.389(8) . ? 
C182 C185 1.470(8) . ? 
C183 C184 1.382(8) . ? 
C183 H183 0.9500 . ? 
C184 H184 0.9500 . ? 
C185 H185 0.9500 . ? 
C186 C191 1.371(8) . ? 
C186 C187 1.384(8) . ? 
C187 C188 1.388(8) . ? 
C187 H187 0.9500 . ? 
C188 C189 1.396(8) . ? 
C188 H188 0.9500 . ? 
C189 C190 1.398(8) . ? 
C189 C192 1.473(8) . ? 
C190 C191 1.372(8) . ? 
C190 H190 0.9500 . ? 
C191 H191 0.9500 . ? 
C192 H192 0.9500 . ? 
C193 C194 1.496(9) . ? 
C193 H19A 0.9900 . ? 
C193 H19B 0.9900 . ? 
C194 H19C 0.9900 . ? 
C194 H19D 0.9900 . ? 
C195 C196 1.520(8) . ? 
C195 H19E 0.9900 . ? 
C195 H19F 0.9900 . ? 
C196 H19G 0.9900 . ? 
C196 H19H 0.9900 . ? 
C197 C198 1.524(9) . ? 
C197 H19I 0.9900 . ? 
C197 H19J 0.9900 . ? 
C198 H19K 0.9900 . ? 
C198 H19L 0.9900 . ? 
C199 C200 1.512(8) . ? 
C199 H19M 0.9900 . ? 
C199 H19N 0.9900 . ? 
C200 H20A 0.9900 . ? 
C200 H20B 0.9900 . ? 
C201 C202 1.518(9) . ? 
C201 H20C 0.9900 . ? 
C201 H20D 0.9900 . ? 
C202 H20E 0.9900 . ? 
C202 H20F 0.9900 . ? 
C203 C204 1.509(8) . ? 
C203 H20G 0.9900 . ? 
C203 H20H 0.9900 . ? 
C204 H20I 0.9900 . ? 
C204 H20J 0.9900 . ? 
C205 C206 1.518(9) . ? 
C205 H20K 0.9900 . ? 
C205 H20L 0.9900 . ? 
C206 H20M 0.9900 . ? 
C206 H20N 0.9900 . ? 
C207 C208 1.525(8) . ? 
C207 H20O 0.9900 . ? 
C207 H20P 0.9900 . ? 
C208 H20Q 0.9900 . ? 
C208 H20R 0.9900 . ? 
C209 C210 1.517(8) . ? 
C209 H20S 0.9900 . ? 
C209 H20T 0.9900 . ? 
C210 H21A 0.9900 . ? 
C210 H21B 0.9900 . ? 
C211 C212 1.495(10) . ? 
C211 H21C 0.9900 . ? 
C211 H21D 0.9900 . ? 
C212 H21E 0.9900 . ? 
C212 H21F 0.9900 . ? 
C213 C214 1.500(9) . ? 
C213 H21G 0.9900 . ? 
C213 H21H 0.9900 . ? 
C214 H21I 0.9900 . ? 
C214 H21J 0.9900 . ? 
C215 C216 1.507(10) . ? 
C215 H21K 0.9900 . ? 
C215 H21L 0.9900 . ? 
C216 H21M 0.9900 . ? 
C216 H21N 0.9900 . ? 
N41 C217 1.409(8) . ? 
N41 C224 1.419(8) . ? 
N41 C231 1.428(7) . ? 
N42 C245 1.420(9) . ? 
N42 C238 1.422(9) . ? 
N42 C252 1.427(9) . ? 
N43 C259 1.399(8) . ? 
N43 C266 1.433(7) . ? 
N43 C273 1.436(8) . ? 
N44 C294 1.417(8) . ? 
N44 C280 1.435(8) . ? 
N44 C287 1.435(8) . ? 
N45 C303 1.460(9) . ? 
N45 C301 1.465(8) . ? 
N45 C305 1.476(8) . ? 
N46 C311 1.460(8) . ? 
N46 C309 1.468(8) . ? 
N46 C307 1.479(8) . ? 
N47 C317 1.455(7) . ? 
N47 C313 1.460(7) . ? 
N47 C315 1.465(8) . ? 
N48 C319 1.459(9) . ? 
N48 C321 1.474(8) . ? 
N48 C323 1.478(8) . ? 
N49 C223 1.259(8) . ? 
N49 C302 1.474(8) . ? 
N50 C300 1.250(8) . ? 
N50 C306 1.467(8) . ? 
N51 C258 1.268(9) . ? 
N51 C304 1.468(10) . ? 
N52 C293 1.260(8) . ? 
N52 C312 1.467(8) . ? 
N53 C244 1.262(8) . ? 
N53 C308 1.484(8) . ? 
N54 C272 1.260(8) . ? 
N54 C310 1.465(7) . ? 
N55 C237 1.266(7) . ? 
N55 C318 1.458(7) . ? 
N56 C286 1.275(8) . ? 
N56 C314 1.457(8) . ? 
N57 C279 1.268(8) . ? 
N57 C316 1.467(8) . ? 
N58 C265 1.262(9) . ? 
N58 C324 1.466(9) . ? 
N59 C251 1.250(9) . ? 
N59 C322 1.473(9) . ? 
N60 C230 1.263(8) . ? 
N60 C320 1.459(8) . ? 
C217 C218 1.391(9) . ? 
C217 C222 1.410(9) . ? 
C218 C219 1.381(9) . ? 
C218 H218 0.9500 . ? 
C219 C220 1.407(9) . ? 
C219 H219 0.9500 . ? 
C220 C221 1.377(9) . ? 
C220 C223 1.470(9) . ? 
C221 C222 1.390(9) . ? 
C221 H221 0.9500 . ? 
C222 H222 0.9500 . ? 
C223 H223 0.9500 . ? 
C224 C229 1.391(8) . ? 
C224 C225 1.397(8) . ? 
C225 C226 1.388(9) . ? 
C225 H225 0.9500 . ? 
C226 C227 1.397(9) . ? 
C226 H226 0.9500 . ? 
C227 C228 1.378(8) . ? 
C227 C230 1.474(9) . ? 
C228 C229 1.377(8) . ? 
C228 H228 0.9500 . ? 
C229 H229 0.9500 . ? 
C230 H230 0.9500 . ? 
C231 C236 1.378(8) . ? 
C231 C232 1.398(8) . ? 
C232 C233 1.365(8) . ? 
C232 H232 0.9500 . ? 
C233 C234 1.391(8) . ? 
C233 H233 0.9500 . ? 
C234 C235 1.392(8) . ? 
C234 C237 1.481(8) . ? 
C235 C236 1.391(8) . ? 
C235 H235 0.9500 . ? 
C236 H236 0.9500 . ? 
C237 H237 0.9500 . ? 
C238 C243 1.366(10) . ? 
C238 C239 1.399(9) . ? 
C239 C240 1.394(9) . ? 
C239 H239 0.9500 . ? 
C240 C241 1.376(10) . ? 
C240 H240 0.9500 . ? 
C241 C242 1.400(9) . ? 
C241 C244 1.466(9) . ? 
C242 C243 1.383(10) . ? 
C242 H242 0.9500 . ? 
C243 H243 0.9500 . ? 
C244 H244 0.9500 . ? 
C245 C246 1.379(10) . ? 
C245 C250 1.381(9) . ? 
C246 C247 1.383(10) . ? 
C246 H246 0.9500 . ? 
C247 C248 1.409(10) . ? 
C247 H247 0.9500 . ? 
C248 C249 1.376(10) . ? 
C248 C251 1.478(10) . ? 
C249 C250 1.392(10) . ? 
C249 H249 0.9500 . ? 
C250 H250 0.9500 . ? 
C251 H251 0.9500 . ? 
C252 C257 1.385(10) . ? 
C252 C253 1.395(10) . ? 
C253 C254 1.379(10) . ? 
C253 H253 0.9500 . ? 
C254 C255 1.390(10) . ? 
C254 H254 0.9500 . ? 
C255 C256 1.366(10) . ? 
C255 C258 1.475(11) . ? 
C256 C257 1.393(11) . ? 
C256 H256 0.9500 . ? 
C257 H257 0.9500 . ? 
C258 H258 0.9500 . ? 
C259 C260 1.395(8) . ? 
C259 C264 1.399(9) . ? 
C260 C261 1.381(9) . ? 
C260 H260 0.9500 . ? 
C261 C262 1.389(9) . ? 
C261 H261 0.9500 . ? 
C262 C263 1.382(9) . ? 
C262 C265 1.463(10) . ? 
C263 C264 1.378(9) . ? 
C263 H263 0.9500 . ? 
C264 H264 0.9500 . ? 
C265 H265 0.9500 . ? 
C266 C267 1.380(8) . ? 
C266 C271 1.384(9) . ? 
C267 C268 1.391(8) . ? 
C267 H267 0.9500 . ? 
C268 C269 1.375(8) . ? 
C268 H268 0.9500 . ? 
C269 C270 1.381(8) . ? 
C269 C272 1.477(8) . ? 
C270 C271 1.383(9) . ? 
C270 H270 0.9500 . ? 
C271 H271 0.9500 . ? 
C272 H272 0.9500 . ? 
C273 C278 1.373(9) . ? 
C273 C274 1.399(9) . ? 
C274 C275 1.382(9) . ? 
C274 H274 0.9500 . ? 
C275 C276 1.375(8) . ? 
C275 H275 0.9500 . ? 
C276 C277 1.396(9) . ? 
C276 C279 1.471(9) . ? 
C277 C278 1.390(9) . ? 
C277 H277 0.9500 . ? 
C278 H278 0.9500 . ? 
C279 H279 0.9500 . ? 
C280 C285 1.380(9) . ? 
C280 C281 1.383(8) . ? 
C281 C282 1.393(8) . ? 
C281 H281 0.9500 . ? 
C282 C283 1.392(9) . ? 
C282 H282 0.9500 . ? 
C283 C284 1.374(8) . ? 
C283 C286 1.470(9) . ? 
C284 C285 1.395(8) . ? 
C284 H284 0.9500 . ? 
C285 H285 0.9500 . ? 
C286 H286 0.9500 . ? 
C287 C292 1.374(9) . ? 
C287 C288 1.394(8) . ? 
C288 C289 1.377(8) . ? 
C288 H288 0.9500 . ? 
C289 C290 1.405(9) . ? 
C289 H289 0.9500 . ? 
C290 C291 1.372(9) . ? 
C290 C293 1.488(9) . ? 
C291 C292 1.384(9) . ? 
C291 H291 0.9500 . ? 
C292 H292 0.9500 . ? 
C293 H293 0.9500 . ? 
C294 C299 1.388(8) . ? 
C294 C295 1.410(9) . ? 
C295 C296 1.373(8) . ? 
C295 H295 0.9500 . ? 
C296 C297 1.398(9) . ? 
C296 H296 0.9500 . ? 
C297 C298 1.389(9) . ? 
C297 C300 1.478(9) . ? 
C298 C299 1.364(9) . ? 
C298 H298 0.9500 . ? 
C299 H299 0.9500 . ? 
C300 H300 0.9500 . ? 
C301 C302 1.506(10) . ? 
C301 H30A 0.9900 . ? 
C301 H30B 0.9900 . ? 
C302 H30C 0.9900 . ? 
C302 H30D 0.9900 . ? 
C303 C304 1.508(11) . ? 
C303 H30E 0.9900 . ? 
C303 H30F 0.9900 . ? 
C304 H30G 0.9900 . ? 
C304 H30H 0.9900 . ? 
C305 C306 1.510(9) . ? 
C305 H30I 0.9900 . ? 
C305 H30J 0.9900 . ? 
C306 H30K 0.9900 . ? 
C306 H30L 0.9900 . ? 
C307 C308 1.512(9) . ? 
C307 H30M 0.9900 . ? 
C307 H30N 0.9900 . ? 
C308 H30O 0.9900 . ? 
C308 H30P 0.9900 . ? 
C309 C310 1.531(8) . ? 
C309 H30Q 0.9900 . ? 
C309 H30R 0.9900 . ? 
C310 H31A 0.9900 . ? 
C310 H31B 0.9900 . ? 
C311 C312 1.509(8) . ? 
C311 H31C 0.9900 . ? 
C311 H31D 0.9900 . ? 
C312 H31E 0.9900 . ? 
C312 H31F 0.9900 . ? 
C313 C314 1.524(8) . ? 
C313 H31G 0.9900 . ? 
C313 H31H 0.9900 . ? 
C314 H31I 0.9900 . ? 
C314 H31J 0.9900 . ? 
C315 C316 1.519(9) . ? 
C315 H31K 0.9900 . ? 
C315 H31L 0.9900 . ? 
C316 H31M 0.9900 . ? 
C316 H31N 0.9900 . ? 
C317 C318 1.507(8) . ? 
C317 H31O 0.9900 . ? 
C317 H31P 0.9900 . ? 
C318 H31Q 0.9900 . ? 
C318 H31R 0.9900 . ? 
C319 C320 1.506(9) . ? 
C319 H31S 0.9900 . ? 
C319 H31T 0.9900 . ? 
C320 H32A 0.9900 . ? 
C320 H32B 0.9900 . ? 
C321 C322 1.521(10) . ? 
C321 H32C 0.9900 . ? 
C321 H32D 0.9900 . ? 
C322 H32E 0.9900 . ? 
C322 H32F 0.9900 . ? 
C323 C324 1.517(10) . ? 
C323 H32G 0.9900 . ? 
C323 H32H 0.9900 . ? 
C324 H32I 0.9900 . ? 
C324 H32J 0.9900 . ? 
N61 C325 1.403(8) . ? 
N61 C339 1.421(8) . ? 
N61 C332 1.429(8) . ? 
N62 C353 1.410(8) . ? 
N62 C360 1.411(8) . ? 
N62 C346 1.439(8) . ? 
N63 C381 1.416(9) . ? 
N63 C374 1.420(9) . ? 
N63 C367 1.426(9) . ? 
N64 C402 1.408(8) . ? 
N64 C400 1.425(8) . ? 
N64 C388 1.431(8) . ? 
N65 C409 1.457(13) . ? 
N65 C411 1.460(11) . ? 
N65 C413 1.466(14) . ? 
N66 C417 1.454(9) . ? 
N66 C419 1.458(9) . ? 
N66 C415 1.465(9) . ? 
N67 C423 1.449(12) . ? 
N67 C421 1.472(10) . ? 
N67 C425 1.489(14) . ? 
N68 C427 1.462(8) . ? 
N68 C431 1.470(9) . ? 
N68 C429 1.472(9) . ? 
N69 C331 1.272(11) . ? 
N69 C410 1.480(11) . ? 
N70 C408 1.283(14) . ? 
N70 C414 1.447(13) . ? 
N71 C352 1.269(8) . ? 
N71 C412 1.453(9) . ? 
N72 C338 1.268(8) . ? 
N72 C416 1.457(9) . ? 
N73 C373 1.144(11) . ? 
N73 C420 1.612(11) . ? 
N74 C366 1.271(9) . ? 
N74 C418 1.486(9) . ? 
N75 C394 1.282(9) . ? 
N75 C426 1.493(9) . ? 
N76 C345 1.261(10) . ? 
N76 C422 1.486(10) . ? 
N77 C387 1.272(10) . ? 
N77 C424 1.496(11) . ? 
N78 C359 1.255(8) . ? 
N78 C428 1.476(8) . ? 
N79 C380 1.259(9) . ? 
N79 C430 1.462(9) . ? 
N80 C401 1.293(10) . ? 
N80 C432 1.480(10) . ? 
C325 C326 1.382(9) . ? 
C325 C330 1.398(9) . ? 
C326 C327 1.373(10) . ? 
C326 H326 0.9500 . ? 
C327 C328 1.393(10) . ? 
C327 H327 0.9500 . ? 
C328 C329 1.397(10) . ? 
C328 C331 1.473(11) . ? 
C329 C330 1.364(9) . ? 
C329 H329 0.9500 . ? 
C330 H330 0.9500 . ? 
C331 H331 0.9500 . ? 
C332 C333 1.373(9) . ? 
C332 C337 1.377(9) . ? 
C333 C334 1.383(9) . ? 
C333 H333 0.9500 . ? 
C334 C335 1.380(9) . ? 
C334 H334 0.9500 . ? 
C335 C336 1.377(9) . ? 
C335 C338 1.468(9) . ? 
C336 C337 1.381(10) . ? 
C336 H336 0.9500 . ? 
C337 H337 0.9500 . ? 
C338 H338 0.9500 . ? 
C339 C340 1.364(9) . ? 
C339 C344 1.373(9) . ? 
C340 C341 1.407(10) . ? 
C340 H340 0.9500 . ? 
C341 C342 1.379(10) . ? 
C341 H341 0.9500 . ? 
C342 C343 1.367(9) . ? 
C342 C345 1.492(10) . ? 
C343 C344 1.369(9) . ? 
C343 H343 0.9500 . ? 
C344 H344 0.9500 . ? 
C345 H345 0.9500 . ? 
C346 C351 1.381(9) . ? 
C346 C347 1.382(9) . ? 
C347 C348 1.375(9) . ? 
C347 H347 0.9500 . ? 
C348 C349 1.378(9) . ? 
C348 H348 0.9500 . ? 
C349 C350 1.398(9) . ? 
C349 C352 1.471(9) . ? 
C350 C351 1.385(9) . ? 
C350 H350 0.9500 . ? 
C351 H351 0.9500 . ? 
C352 H352 0.9500 . ? 
C353 C354 1.370(9) . ? 
C353 C358 1.390(9) . ? 
C354 C355 1.403(9) . ? 
C354 H354 0.9500 . ? 
C355 C356 1.400(9) . ? 
C355 H355 0.9500 . ? 
C356 C357 1.378(9) . ? 
C356 C359 1.475(9) . ? 
C357 C358 1.378(9) . ? 
C357 H357 0.9500 . ? 
C358 H358 0.9500 . ? 
C359 H359 0.9500 . ? 
C360 C361 1.381(9) . ? 
C360 C365 1.394(8) . ? 
C361 C362 1.390(9) . ? 
C361 H361 0.9500 . ? 
C362 C363 1.380(9) . ? 
C362 H362 0.9500 . ? 
C363 C364 1.391(9) . ? 
C363 C366 1.459(9) . ? 
C364 C365 1.380(9) . ? 
C364 H364 0.9500 . ? 
C365 H365 0.9500 . ? 
C366 H366 0.9500 . ? 
C367 C372 1.380(11) . ? 
C367 C368 1.389(11) . ? 
C368 C369 1.361(12) . ? 
C368 H368 0.9500 . ? 
C369 C370 1.325(13) . ? 
C369 H369 0.9500 . ? 
C370 C371 1.398(12) . ? 
C370 C373 1.548(15) . ? 
C371 C372 1.393(11) . ? 
C371 H371 0.9500 . ? 
C372 H372 0.9500 . ? 
C373 H373 0.9500 . ? 
C374 C375 1.374(9) . ? 
C374 C379 1.384(10) . ? 
C375 C376 1.362(9) . ? 
C375 H375 0.9500 . ? 
C376 C377 1.376(9) . ? 
C376 H376 0.9500 . ? 
C377 C378 1.402(10) . ? 
C377 C380 1.466(10) . ? 
C378 C379 1.381(10) . ? 
C378 H378 0.9500 . ? 
C379 H379 0.9500 . ? 
C380 H380 0.9500 . ? 
C381 C386 1.368(10) . ? 
C381 C382 1.402(10) . ? 
C382 C383 1.385(11) . ? 
C382 H382 0.9500 . ? 
C383 C384 1.387(11) . ? 
C383 H383 0.9500 . ? 
C384 C385 1.365(10) . ? 
C384 C387 1.492(12) . ? 
C385 C386 1.383(11) . ? 
C385 H385 0.9500 . ? 
C386 H386 0.9500 . ? 
C387 H387 0.9500 . ? 
C388 C389 1.365(9) . ? 
C388 C393 1.372(9) . ? 
C389 C390 1.379(9) . ? 
C389 H389 0.9500 . ? 
C390 C391 1.382(9) . ? 
C390 H390 0.9500 . ? 
C391 C392 1.380(9) . ? 
C391 C394 1.467(9) . ? 
C392 C393 1.386(9) . ? 
C392 H392 0.9500 . ? 
C393 H393 0.9500 . ? 
C394 H394 0.9500 . ? 
C395 C396 1.381(10) . ? 
C395 C400 1.385(9) . ? 
C395 H395 0.9500 . ? 
C396 C397 1.374(10) . ? 
C396 H396 0.9500 . ? 
C397 C398 1.397(10) . ? 
C397 C401 1.460(10) . ? 
C398 C399 1.390(10) . ? 
C398 H398 0.9500 . ? 
C399 C400 1.368(9) . ? 
C399 H399 0.9500 . ? 
C401 H401 0.9500 . ? 
C402 C407 1.387(10) . ? 
C402 C403 1.393(9) . ? 
C403 C404 1.365(11) . ? 
C403 H403 0.9500 . ? 
C404 C405 1.356(11) . ? 
C404 H404 0.9500 . ? 
C405 C406 1.403(11) . ? 
C405 C408 1.481(12) . ? 
C406 C407 1.372(10) . ? 
C406 H406 0.9500 . ? 
C407 H407 0.9500 . ? 
C408 H408 0.9500 . ? 
C409 C410 1.549(12) . ? 
C409 H40A 0.9900 . ? 
C409 H40B 0.9900 . ? 
C410 H41A 0.9900 . ? 
C410 H41B 0.9900 . ? 
C411 C412 1.482(11) . ? 
C411 H41C 0.9900 . ? 
C411 H41D 0.9900 . ? 
C412 H41E 0.9900 . ? 
C412 H41F 0.9900 . ? 
C413 C414 1.52(2) . ? 
C413 H41G 0.9900 . ? 
C413 H41H 0.9900 . ? 
C414 H41I 0.9900 . ? 
C414 H41J 0.9900 . ? 
C415 C416 1.540(10) . ? 
C415 H41K 0.9900 . ? 
C415 H41L 0.9900 . ? 
C416 H41M 0.9900 . ? 
C416 H41N 0.9900 . ? 
C417 C418 1.519(11) . ? 
C417 H41O 0.9900 . ? 
C417 H41P 0.9900 . ? 
C418 H41Q 0.9900 . ? 
C418 H41R 0.9900 . ? 
C419 C420 1.503(10) . ? 
C419 H41S 0.9900 . ? 
C419 H41T 0.9900 . ? 
C420 H42A 0.9900 . ? 
C420 H42B 0.9900 . ? 
C421 C422 1.480(14) . ? 
C421 H42C 0.9900 . ? 
C421 H42D 0.9900 . ? 
C422 H42E 0.9900 . ? 
C422 H42F 0.9900 . ? 
C423 C424 1.513(11) . ? 
C423 H42G 0.9900 . ? 
C423 H42H 0.9900 . ? 
C424 H42I 0.9900 . ? 
C424 H42J 0.9900 . ? 
C425 C426 1.501(14) . ? 
C425 H42K 0.9900 . ? 
C425 H42L 0.9900 . ? 
C426 H42M 0.9900 . ? 
C426 H42N 0.9900 . ? 
C427 C428 1.505(10) . ? 
C427 H42O 0.9900 . ? 
C427 H42P 0.9900 . ? 
C428 H42Q 0.9900 . ? 
C428 H42R 0.9900 . ? 
C429 C430 1.519(11) . ? 
C429 H42S 0.9900 . ? 
C429 H42T 0.9900 . ? 
C430 H43A 0.9900 . ? 
C430 H43B 0.9900 . ? 
C431 C432 1.531(10) . ? 
C431 H43C 0.9900 . ? 
C431 H43D 0.9900 . ? 
C432 H43E 0.9900 . ? 
C432 H43F 0.9900 . ? 
C501 O1 1.403(9) . ? 
C502 O2 1.431(8) . ? 
C503 O3 1.445(7) . ? 
C504 O4 1.365(12) . ? 
C505 O5 1.463(9) . ? 
C506 O6 1.420(11) . ? 
C507 O7 1.45(2) . ? 
C508 O8 1.405(14) . ? 
C509 O9 1.555(18) . ? 
C510 O10 1.45(3) . ? 
C511 O11 1.633(18) . ? 
C512 O12A 1.374(10) . ? 
C512 O12B 1.526(16) . ? 
O12A O12B 1.314(15) . ? 
C513 O13B 1.269(17) . ? 
C513 O13A 1.347(15) . ? 
C514 O14 1.51(3) . ? 
C515 O15 1.47(4) . ? 
C516 C517 1.37(3) . ? 
C516 O16 1.560(19) . ? 
C517 O17 1.55(3) . ? 
C518 C519 1.28(3) . ? 
C518 O18 1.42(3) . ? 
O18 C519 1.42(2) . ? 
C519 O19 1.69(3) . ? 
C520 O20 1.55(3) . ? 
C520 O48 1.73(4) . ? 
O20 O47 1.75(3) . ? 
C521 O21 1.68(2) . ? 
C522 O22 1.60(2) . ? 
C523 O45 1.16(4) . ? 
C523 O23 1.56(5) . ? 
O23 O48 1.62(4) . ? 
 
loop_ 
 _geom_angle_atom_site_label_1 
 _geom_angle_atom_site_label_2 
 _geom_angle_atom_site_label_3 
 _geom_angle 
 _geom_angle_site_symmetry_1 
 _geom_angle_site_symmetry_3 
 _geom_angle_publ_flag 
C15 N1 C1 121.3(5) . . ? 
C15 N1 C8 118.5(5) . . ? 
C1 N1 C8 117.2(5) . . ? 
C22 N2 C36 123.2(6) . . ? 
C22 N2 C29 118.7(6) . . ? 
C36 N2 C29 117.9(5) . . ? 
C57 N3 C50 120.4(5) . . ? 
C57 N3 C43 122.9(5) . . ? 
C50 N3 C43 115.2(5) . . ? 
C64 N4 C71 120.1(5) . . ? 
C64 N4 C78 118.5(5) . . ? 
C71 N4 C78 121.1(5) . . ? 
C87 N5 C89 110.8(5) . . ? 
C87 N5 C85 110.2(6) . . ? 
C89 N5 C85 112.1(6) . . ? 
C93 N6 C95 111.4(5) . . ? 
C93 N6 C91 110.6(5) . . ? 
C95 N6 C91 111.2(5) . . ? 
C99 N7 C97 111.1(6) . . ? 
C99 N7 C101 111.7(7) . . ? 
C97 N7 C101 111.5(7) . . ? 
C103 N8 C107 109.5(4) . . ? 
C103 N8 C105 110.3(5) . . ? 
C107 N8 C105 110.6(5) . . ? 
C7 N9 C86 118.0(6) . . ? 
C77 N10 C90 117.0(6) . . ? 
C42 N11 C88 116.0(7) . . ? 
C70 N12 C96 116.8(5) . . ? 
C28 N13 C92 117.4(6) . . ? 
C63 N14 C94 117.2(5) . . ? 
C35 N15 C100 117.6(7) . . ? 
C56 N16 C102 117.4(7) . . ? 
C14 N17 C98 117.5(7) . . ? 
C21 N18 C104 116.7(5) . . ? 
C49 N19 C106 118.4(5) . . ? 
C84 N20 C108 117.1(5) . . ? 
C2 C1 C6 118.4(6) . . ? 
C2 C1 N1 121.5(6) . . ? 
C6 C1 N1 120.1(6) . . ? 
C3 C2 C1 120.4(6) . . ? 
C3 C2 H2 119.8 . . ? 
C1 C2 H2 119.8 . . ? 
C2 C3 C4 122.0(6) . . ? 
C2 C3 H3 119.0 . . ? 
C4 C3 H3 119.0 . . ? 
C5 C4 C3 117.0(6) . . ? 
C5 C4 C7 120.2(7) . . ? 
C3 C4 C7 122.7(6) . . ? 
C6 C5 C4 121.4(7) . . ? 
C6 C5 H5 119.3 . . ? 
C4 C5 H5 119.3 . . ? 
C5 C6 C1 120.7(7) . . ? 
C5 C6 H6 119.6 . . ? 
C1 C6 H6 119.6 . . ? 
N9 C7 C4 122.4(7) . . ? 
N9 C7 H7 118.8 . . ? 
C4 C7 H7 118.8 . . ? 
C9 C8 C13 120.3(6) . . ? 
C9 C8 N1 121.0(6) . . ? 
C13 C8 N1 118.7(6) . . ? 
C8 C9 C10 119.1(7) . . ? 
C8 C9 H9 120.5 . . ? 
C10 C9 H9 120.5 . . ? 
C11 C10 C9 120.0(7) . . ? 
C11 C10 H10 120.0 . . ? 
C9 C10 H10 120.0 . . ? 
C12 C11 C10 118.9(7) . . ? 
C12 C11 C14 119.9(6) . . ? 
C10 C11 C14 121.1(7) . . ? 
C11 C12 C13 122.1(6) . . ? 
C11 C12 H12 118.9 . . ? 
C13 C12 H12 118.9 . . ? 
C12 C13 C8 119.4(6) . . ? 
C12 C13 H13 120.3 . . ? 
C8 C13 H13 120.3 . . ? 
N17 C14 C11 122.5(7) . . ? 
N17 C14 H14 118.7 . . ? 
C11 C14 H14 118.7 . . ? 
C20 C15 C16 117.8(6) . . ? 
C20 C15 N1 122.7(6) . . ? 
C16 C15 N1 119.5(6) . . ? 
C17 C16 C15 121.0(6) . . ? 
C17 C16 H16 119.5 . . ? 
C15 C16 H16 119.5 . . ? 
C16 C17 C18 120.4(6) . . ? 
C16 C17 H17 119.8 . . ? 
C18 C17 H17 119.8 . . ? 
C19 C18 C17 118.2(6) . . ? 
C19 C18 C21 118.8(6) . . ? 
C17 C18 C21 123.0(6) . . ? 
C20 C19 C18 121.1(6) . . ? 
C20 C19 H19 119.5 . . ? 
C18 C19 H19 119.5 . . ? 
C15 C20 C19 121.6(6) . . ? 
C15 C20 H20 119.2 . . ? 
C19 C20 H20 119.2 . . ? 
N18 C21 C18 124.4(6) . . ? 
N18 C21 H21 117.8 . . ? 
C18 C21 H21 117.8 . . ? 
C27 C22 C23 117.8(6) . . ? 
C27 C22 N2 120.2(6) . . ? 
C23 C22 N2 121.9(6) . . ? 
C24 C23 C22 121.0(6) . . ? 
C24 C23 H23 119.5 . . ? 
C22 C23 H23 119.5 . . ? 
C23 C24 C25 121.1(6) . . ? 
C23 C24 H24 119.4 . . ? 
C25 C24 H24 119.4 . . ? 
C24 C25 C26 118.1(6) . . ? 
C24 C25 C28 121.7(6) . . ? 
C26 C25 C28 120.2(6) . . ? 
C25 C26 C27 120.8(7) . . ? 
C25 C26 H26 119.6 . . ? 
C27 C26 H26 119.6 . . ? 
C22 C27 C26 121.2(7) . . ? 
C22 C27 H27 119.4 . . ? 
C26 C27 H27 119.4 . . ? 
N13 C28 C25 123.6(7) . . ? 
N13 C28 H28 118.2 . . ? 
C25 C28 H28 118.2 . . ? 
C34 C29 C30 119.4(7) . . ? 
C34 C29 N2 120.8(6) . . ? 
C30 C29 N2 119.9(6) . . ? 
C29 C30 C31 120.5(7) . . ? 
C29 C30 H30 119.8 . . ? 
C31 C30 H30 119.8 . . ? 
C30 C31 C32 119.6(7) . . ? 
C30 C31 H31 120.2 . . ? 
C32 C31 H31 120.2 . . ? 
C33 C32 C31 118.9(7) . . ? 
C33 C32 C35 120.0(7) . . ? 
C31 C32 C35 121.1(7) . . ? 
C32 C33 C34 121.0(7) . . ? 
C32 C33 H33 119.5 . . ? 
C34 C33 H33 119.5 . . ? 
C29 C34 C33 120.6(7) . . ? 
C29 C34 H34 119.7 . . ? 
C33 C34 H34 119.7 . . ? 
N15 C35 C32 121.5(7) . . ? 
N15 C35 H35 119.2 . . ? 
C32 C35 H35 119.2 . . ? 
C37 C36 C41 119.9(7) . . ? 
C37 C36 N2 119.1(6) . . ? 
C41 C36 N2 121.0(6) . . ? 
C36 C37 C38 120.0(6) . . ? 
C36 C37 H37 120.0 . . ? 
C38 C37 H37 120.0 . . ? 
C39 C38 C37 120.8(7) . . ? 
C39 C38 H38 119.6 . . ? 
C37 C38 H38 119.6 . . ? 
C38 C39 C40 118.7(7) . . ? 
C38 C39 C42 121.5(7) . . ? 
C40 C39 C42 119.8(7) . . ? 
C39 C40 C41 121.7(7) . . ? 
C39 C40 H40 119.1 . . ? 
C41 C40 H40 119.1 . . ? 
C36 C41 C40 118.8(7) . . ? 
C36 C41 H41 120.6 . . ? 
C40 C41 H41 120.6 . . ? 
N11 C42 C39 124.0(7) . . ? 
N11 C42 H42 118.0 . . ? 
C39 C42 H42 118.0 . . ? 
C44 C43 C48 119.0(6) . . ? 
C44 C43 N3 121.5(6) . . ? 
C48 C43 N3 119.5(6) . . ? 
C43 C44 C45 119.7(6) . . ? 
C43 C44 H44 120.1 . . ? 
C45 C44 H44 120.1 . . ? 
C44 C45 C46 121.4(6) . . ? 
C44 C45 H45 119.3 . . ? 
C46 C45 H45 119.3 . . ? 
C47 C46 C45 118.3(6) . . ? 
C47 C46 C49 121.0(6) . . ? 
C45 C46 C49 120.5(6) . . ? 
C46 C47 C48 121.4(6) . . ? 
C46 C47 H47 119.3 . . ? 
C48 C47 H47 119.3 . . ? 
C47 C48 C43 120.1(6) . . ? 
C47 C48 H48 120.0 . . ? 
C43 C48 H48 120.0 . . ? 
N19 C49 C46 122.2(6) . . ? 
N19 C49 H49 118.9 . . ? 
C46 C49 H49 118.9 . . ? 
C51 C50 C55 119.3(6) . . ? 
C51 C50 N3 120.7(6) . . ? 
C55 C50 N3 119.9(6) . . ? 
C52 C51 C50 120.5(7) . . ? 
C52 C51 H51 119.7 . . ? 
C50 C51 H51 119.7 . . ? 
C51 C52 C53 120.1(7) . . ? 
C51 C52 H52 120.0 . . ? 
C53 C52 H52 120.0 . . ? 
C54 C53 C52 119.5(7) . . ? 
C54 C53 C56 118.5(7) . . ? 
C52 C53 C56 121.9(7) . . ? 
C55 C54 C53 120.1(7) . . ? 
C55 C54 H54 119.9 . . ? 
C53 C54 H54 119.9 . . ? 
C54 C55 C50 120.4(7) . . ? 
C54 C55 H55 119.8 . . ? 
C50 C55 H55 119.8 . . ? 
N16 C56 C53 123.0(7) . . ? 
N16 C56 H56 118.5 . . ? 
C53 C56 H56 118.5 . . ? 
N3 C57 C62 122.3(6) . . ? 
N3 C57 C58 120.8(6) . . ? 
C62 C57 C58 116.9(6) . . ? 
C59 C58 C57 120.7(6) . . ? 
C59 C58 H58 119.7 . . ? 
C57 C58 H58 119.7 . . ? 
C60 C59 C58 122.4(7) . . ? 
C60 C59 H59 118.8 . . ? 
C58 C59 H59 118.8 . . ? 
C59 C60 C61 117.4(6) . . ? 
C59 C60 C63 123.5(6) . . ? 
C61 C60 C63 119.1(6) . . ? 
C62 C61 C60 120.8(6) . . ? 
C62 C61 H61 119.6 . . ? 
C60 C61 H61 119.6 . . ? 
C57 C62 C61 121.8(6) . . ? 
C57 C62 H62 119.1 . . ? 
C61 C62 H62 119.1 . . ? 
N14 C63 C60 123.6(6) . . ? 
N14 C63 H63 118.2 . . ? 
C60 C63 H63 118.2 . . ? 
C69 C64 C65 119.0(6) . . ? 
C69 C64 N4 119.9(5) . . ? 
C65 C64 N4 121.1(6) . . ? 
C66 C65 C64 119.9(6) . . ? 
C66 C65 H65 120.1 . . ? 
C64 C65 H65 120.1 . . ? 
C67 C66 C65 121.7(6) . . ? 
C67 C66 H66 119.1 . . ? 
C65 C66 H66 119.1 . . ? 
C66 C67 C68 117.5(5) . . ? 
C66 C67 C70 122.6(5) . . ? 
C68 C67 C70 119.5(6) . . ? 
C69 C68 C67 121.3(6) . . ? 
C69 C68 H68 119.4 . . ? 
C67 C68 H68 119.4 . . ? 
C64 C69 C68 120.5(6) . . ? 
C64 C69 H69 119.7 . . ? 
C68 C69 H69 119.7 . . ? 
N12 C70 C67 124.6(6) . . ? 
N12 C70 H70 117.7 . . ? 
C67 C70 H70 117.7 . . ? 
C76 C71 C72 119.6(6) . . ? 
C76 C71 N4 120.5(6) . . ? 
C72 C71 N4 119.9(5) . . ? 
C71 C72 C73 120.5(6) . . ? 
C71 C72 H72 119.7 . . ? 
C73 C72 H72 119.7 . . ? 
C74 C73 C72 120.4(6) . . ? 
C74 C73 H73 119.8 . . ? 
C72 C73 H73 119.8 . . ? 
C73 C74 C75 118.7(6) . . ? 
C73 C74 C77 121.2(6) . . ? 
C75 C74 C77 119.7(6) . . ? 
C74 C75 C76 120.7(6) . . ? 
C74 C75 H75 119.7 . . ? 
C76 C75 H75 119.7 . . ? 
C71 C76 C75 119.8(6) . . ? 
C71 C76 H76 120.1 . . ? 
C75 C76 H76 120.1 . . ? 
N10 C77 C74 122.9(6) . . ? 
N10 C77 H77 118.6 . . ? 
C74 C77 H77 118.6 . . ? 
C83 C78 C79 118.8(6) . . ? 
C83 C78 N4 118.1(6) . . ? 
C79 C78 N4 123.0(6) . . ? 
C80 C79 C78 120.6(6) . . ? 
C80 C79 H79 119.7 . . ? 
C78 C79 H79 119.7 . . ? 
C79 C80 C81 121.3(6) . . ? 
C79 C80 H80 119.3 . . ? 
C81 C80 H80 119.3 . . ? 
C82 C81 C80 117.4(6) . . ? 
C82 C81 C84 118.4(6) . . ? 
C80 C81 C84 124.2(6) . . ? 
C83 C82 C81 122.4(6) . . ? 
C83 C82 H82 118.8 . . ? 
C81 C82 H82 118.8 . . ? 
C82 C83 C78 119.4(6) . . ? 
C82 C83 H83 120.3 . . ? 
C78 C83 H83 120.3 . . ? 
N20 C84 C81 125.4(6) . . ? 
N20 C84 H84 117.3 . . ? 
C81 C84 H84 117.3 . . ? 
N5 C85 C86 112.7(6) . . ? 
N5 C85 H85A 109.0 . . ? 
C86 C85 H85A 109.0 . . ? 
N5 C85 H85B 109.0 . . ? 
C86 C85 H85B 109.0 . . ? 
H85A C85 H85B 107.8 . . ? 
N9 C86 C85 109.2(6) . . ? 
N9 C86 H86A 109.8 . . ? 
C85 C86 H86A 109.8 . . ? 
N9 C86 H86B 109.8 . . ? 
C85 C86 H86B 109.8 . . ? 
H86A C86 H86B 108.3 . . ? 
N5 C87 C88 113.4(6) . . ? 
N5 C87 H87A 108.9 . . ? 
C88 C87 H87A 108.9 . . ? 
N5 C87 H87B 108.9 . . ? 
C88 C87 H87B 108.9 . . ? 
H87A C87 H87B 107.7 . . ? 
N11 C88 C87 110.6(6) . . ? 
N11 C88 H88A 109.5 . . ? 
C87 C88 H88A 109.5 . . ? 
N11 C88 H88B 109.5 . . ? 
C87 C88 H88B 109.5 . . ? 
H88A C88 H88B 108.1 . . ? 
N5 C89 C90 112.4(6) . . ? 
N5 C89 H89A 109.1 . . ? 
C90 C89 H89A 109.1 . . ? 
N5 C89 H89B 109.1 . . ? 
C90 C89 H89B 109.1 . . ? 
H89A C89 H89B 107.9 . . ? 
N10 C90 C89 111.6(6) . . ? 
N10 C90 H90A 109.3 . . ? 
C89 C90 H90A 109.3 . . ? 
N10 C90 H90B 109.3 . . ? 
C89 C90 H90B 109.3 . . ? 
H90A C90 H90B 108.0 . . ? 
N6 C91 C92 111.6(5) . . ? 
N6 C91 H91A 109.3 . . ? 
C92 C91 H91A 109.3 . . ? 
N6 C91 H91B 109.3 . . ? 
C92 C91 H91B 109.3 . . ? 
H91A C91 H91B 108.0 . . ? 
N13 C92 C91 110.2(5) . . ? 
N13 C92 H92A 109.6 . . ? 
C91 C92 H92A 109.6 . . ? 
N13 C92 H92B 109.6 . . ? 
C91 C92 H92B 109.6 . . ? 
H92A C92 H92B 108.1 . . ? 
N6 C93 C94 113.2(5) . . ? 
N6 C93 H93A 108.9 . . ? 
C94 C93 H93A 108.9 . . ? 
N6 C93 H93B 108.9 . . ? 
C94 C93 H93B 108.9 . . ? 
H93A C93 H93B 107.8 . . ? 
N14 C94 C93 110.4(5) . . ? 
N14 C94 H94A 109.6 . . ? 
C93 C94 H94A 109.6 . . ? 
N14 C94 H94B 109.6 . . ? 
C93 C94 H94B 109.6 . . ? 
H94A C94 H94B 108.1 . . ? 
N6 C95 C96 111.7(5) . . ? 
N6 C95 H95A 109.3 . . ? 
C96 C95 H95A 109.3 . . ? 
N6 C95 H95B 109.3 . . ? 
C96 C95 H95B 109.3 . . ? 
H95A C95 H95B 107.9 . . ? 
N12 C96 C95 112.8(5) . . ? 
N12 C96 H96A 109.0 . . ? 
C95 C96 H96A 109.0 . . ? 
N12 C96 H96B 109.0 . . ? 
C95 C96 H96B 109.0 . . ? 
H96A C96 H96B 107.8 . . ? 
N7 C97 C98 112.6(7) . . ? 
N7 C97 H97A 109.1 . . ? 
C98 C97 H97A 109.1 . . ? 
N7 C97 H97B 109.1 . . ? 
C98 C97 H97B 109.1 . . ? 
H97A C97 H97B 107.8 . . ? 
N17 C98 C97 109.8(7) . . ? 
N17 C98 H98A 109.7 . . ? 
C97 C98 H98A 109.7 . . ? 
N17 C98 H98B 109.7 . . ? 
C97 C98 H98B 109.7 . . ? 
H98A C98 H98B 108.2 . . ? 
N7 C99 C100 113.3(6) . . ? 
N7 C99 H99A 108.9 . . ? 
C100 C99 H99A 108.9 . . ? 
N7 C99 H99B 108.9 . . ? 
C100 C99 H99B 108.9 . . ? 
H99A C99 H99B 107.7 . . ? 
N15 C100 C99 109.0(7) . . ? 
N15 C100 H10A 109.9 . . ? 
C99 C100 H10A 109.9 . . ? 
N15 C100 H10B 109.9 . . ? 
C99 C100 H10B 109.9 . . ? 
H10A C100 H10B 108.3 . . ? 
N7 C101 C102 109.5(7) . . ? 
N7 C101 H10C 109.8 . . ? 
C102 C101 H10C 109.8 . . ? 
N7 C101 H10D 109.8 . . ? 
C102 C101 H10D 109.8 . . ? 
H10C C101 H10D 108.2 . . ? 
N16 C102 C101 108.7(7) . . ? 
N16 C102 H10E 109.9 . . ? 
C101 C102 H10E 109.9 . . ? 
N16 C102 H10F 109.9 . . ? 
C101 C102 H10F 109.9 . . ? 
H10E C102 H10F 108.3 . . ? 
N8 C103 C104 113.4(5) . . ? 
N8 C103 H10G 108.9 . . ? 
C104 C103 H10G 108.9 . . ? 
N8 C103 H10H 108.9 . . ? 
C104 C103 H10H 108.9 . . ? 
H10G C103 H10H 107.7 . . ? 
N18 C104 C103 111.9(5) . . ? 
N18 C104 H10I 109.2 . . ? 
C103 C104 H10I 109.2 . . ? 
N18 C104 H10J 109.2 . . ? 
C103 C104 H10J 109.2 . . ? 
H10I C104 H10J 107.9 . . ? 
N8 C105 C106 112.1(5) . . ? 
N8 C105 H10K 109.2 . . ? 
C106 C105 H10K 109.2 . . ? 
N8 C105 H10L 109.2 . . ? 
C106 C105 H10L 109.2 . . ? 
H10K C105 H10L 107.9 . . ? 
N19 C106 C105 111.6(5) . . ? 
N19 C106 H10M 109.3 . . ? 
C105 C106 H10M 109.3 . . ? 
N19 C106 H10N 109.3 . . ? 
C105 C106 H10N 109.3 . . ? 
H10M C106 H10N 108.0 . . ? 
N8 C107 C108 113.9(5) . . ? 
N8 C107 H10O 108.8 . . ? 
C108 C107 H10O 108.8 . . ? 
N8 C107 H10P 108.8 . . ? 
C108 C107 H10P 108.8 . . ? 
H10O C107 H10P 107.7 . . ? 
N20 C108 C107 111.5(5) . . ? 
N20 C108 H10Q 109.3 . . ? 
C107 C108 H10Q 109.3 . . ? 
N20 C108 H10R 109.3 . . ? 
C107 C108 H10R 109.3 . . ? 
H10Q C108 H10R 108.0 . . ? 
C109 N21 C123 120.0(5) . . ? 
C109 N21 C116 119.5(5) . . ? 
C123 N21 C116 118.7(5) . . ? 
C144 N22 C137 120.8(5) . . ? 
C144 N22 C130 120.8(5) . . ? 
C137 N22 C130 115.5(5) . . ? 
C151 N23 C165 120.4(5) . . ? 
C151 N23 C158 118.9(5) . . ? 
C165 N23 C158 117.9(5) . . ? 
C172 N24 C179 121.8(5) . . ? 
C172 N24 C186 118.6(5) . . ? 
C179 N24 C186 118.2(5) . . ? 
C195 N25 C193 111.5(5) . . ? 
C195 N25 C197 111.8(5) . . ? 
C193 N25 C197 112.1(5) . . ? 
C199 N26 C201 110.2(5) . . ? 
C199 N26 C203 111.6(5) . . ? 
C201 N26 C203 110.5(5) . . ? 
C207 N27 C205 111.9(5) . . ? 
C207 N27 C209 111.5(5) . . ? 
C205 N27 C209 110.8(5) . . ? 
C215 N28 C211 111.5(6) . . ? 
C215 N28 C213 110.2(6) . . ? 
C211 N28 C213 108.9(6) . . ? 
C115 N29 C194 116.4(6) . . ? 
C192 N30 C198 117.2(5) . . ? 
C150 N31 C196 117.0(5) . . ? 
C185 N32 C204 118.4(6) . . ? 
C136 N33 C200 117.6(5) . . ? 
C171 N34 C202 117.7(6) . . ? 
C122 N35 C206 117.0(6) . . ? 
C143 N36 C210 116.7(5) . . ? 
C164 N37 C208 118.1(5) . . ? 
C129 N38 C212 115.2(8) . . ? 
C178 N39 C216 115.9(6) . . ? 
C157 N40 C214 117.2(6) . . ? 
C114 C109 C110 119.0(6) . . ? 
C114 C109 N21 120.4(6) . . ? 
C110 C109 N21 120.6(6) . . ? 
C111 C110 C109 120.0(6) . . ? 
C111 C110 H110 120.0 . . ? 
C109 C110 H110 120.0 . . ? 
C110 C111 C112 122.0(6) . . ? 
C110 C111 H111 119.0 . . ? 
C112 C111 H111 119.0 . . ? 
C113 C112 C111 117.5(6) . . ? 
C113 C112 C115 118.6(6) . . ? 
C111 C112 C115 123.8(6) . . ? 
C112 C113 C114 121.0(6) . . ? 
C112 C113 H113 119.5 . . ? 
C114 C113 H113 119.5 . . ? 
C109 C114 C113 120.4(6) . . ? 
C109 C114 H114 119.8 . . ? 
C113 C114 H114 119.8 . . ? 
N29 C115 C112 123.5(6) . . ? 
N29 C115 H115 118.3 . . ? 
C112 C115 H115 118.3 . . ? 
C121 C116 C117 119.1(6) . . ? 
C121 C116 N21 121.1(6) . . ? 
C117 C116 N21 119.8(6) . . ? 
C118 C117 C116 120.0(6) . . ? 
C118 C117 H117 120.0 . . ? 
C116 C117 H117 120.0 . . ? 
C117 C118 C119 121.6(6) . . ? 
C117 C118 H118 119.2 . . ? 
C119 C118 H118 119.2 . . ? 
C118 C119 C120 118.2(6) . . ? 
C118 C119 C122 121.9(6) . . ? 
C120 C119 C122 119.7(6) . . ? 
C121 C120 C119 120.9(6) . . ? 
C121 C120 H120 119.5 . . ? 
C119 C120 H120 119.5 . . ? 
C120 C121 C116 120.2(6) . . ? 
C120 C121 H121 119.9 . . ? 
C116 C121 H121 119.9 . . ? 
N35 C122 C119 121.4(6) . . ? 
N35 C122 H122 119.3 . . ? 
C119 C122 H122 119.3 . . ? 
C128 C123 C124 118.9(6) . . ? 
C128 C123 N21 120.9(6) . . ? 
C124 C123 N21 120.3(6) . . ? 
C125 C124 C123 119.8(7) . . ? 
C125 C124 H124 120.1 . . ? 
C123 C124 H124 120.1 . . ? 
C124 C125 C126 121.9(7) . . ? 
C124 C125 H125 119.0 . . ? 
C126 C125 H125 119.0 . . ? 
C127 C126 C125 117.8(7) . . ? 
C127 C126 C129 118.4(7) . . ? 
C125 C126 C129 123.7(7) . . ? 
C128 C127 C126 120.6(7) . . ? 
C128 C127 H127 119.7 . . ? 
C126 C127 H127 119.7 . . ? 
C123 C128 C127 121.0(7) . . ? 
C123 C128 H128 119.5 . . ? 
C127 C128 H128 119.5 . . ? 
N38 C129 C126 122.0(8) . . ? 
N38 C129 H129 119.0 . . ? 
C126 C129 H129 119.0 . . ? 
C131 C130 C135 119.4(5) . . ? 
C131 C130 N22 121.3(5) . . ? 
C135 C130 N22 119.2(5) . . ? 
C132 C131 C130 119.8(5) . . ? 
C132 C131 H131 120.1 . . ? 
C130 C131 H131 120.1 . . ? 
C131 C132 C133 120.7(5) . . ? 
C131 C132 H132 119.6 . . ? 
C133 C132 H132 119.6 . . ? 
C134 C133 C132 118.7(5) . . ? 
C134 C133 C136 120.6(5) . . ? 
C132 C133 C136 120.7(5) . . ? 
C135 C134 C133 120.5(6) . . ? 
C135 C134 H134 119.7 . . ? 
C133 C134 H134 119.7 . . ? 
C134 C135 C130 120.8(6) . . ? 
C134 C135 H135 119.6 . . ? 
C130 C135 H135 119.6 . . ? 
N33 C136 C133 122.6(6) . . ? 
N33 C136 H136 118.7 . . ? 
C133 C136 H136 118.7 . . ? 
C142 C137 C138 119.8(6) . . ? 
C142 C137 N22 121.7(6) . . ? 
C138 C137 N22 118.5(5) . . ? 
C139 C138 C137 119.4(6) . . ? 
C139 C138 H138 120.3 . . ? 
C137 C138 H138 120.3 . . ? 
C140 C139 C138 121.7(6) . . ? 
C140 C139 H139 119.1 . . ? 
C138 C139 H139 119.1 . . ? 
C139 C140 C141 118.4(5) . . ? 
C139 C140 C143 121.3(6) . . ? 
C141 C140 C143 120.0(6) . . ? 
C142 C141 C140 121.0(6) . . ? 
C142 C141 H141 119.5 . . ? 
C140 C141 H141 119.5 . . ? 
C137 C142 C141 119.8(6) . . ? 
C137 C142 H142 120.1 . . ? 
C141 C142 H142 120.1 . . ? 
N36 C143 C140 121.2(6) . . ? 
N36 C143 H143 119.4 . . ? 
C140 C143 H143 119.4 . . ? 
C145 C144 C149 118.3(6) . . ? 
C145 C144 N22 121.5(5) . . ? 
C149 C144 N22 120.2(5) . . ? 
C146 C145 C144 121.2(6) . . ? 
C146 C145 H145 119.4 . . ? 
C144 C145 H145 119.4 . . ? 
C145 C146 C147 120.6(6) . . ? 
C145 C146 H146 119.7 . . ? 
C147 C146 H146 119.7 . . ? 
C148 C147 C146 118.3(6) . . ? 
C148 C147 C150 119.4(5) . . ? 
C146 C147 C150 122.1(5) . . ? 
C149 C148 C147 121.4(6) . . ? 
C149 C148 H148 119.3 . . ? 
C147 C148 H148 119.3 . . ? 
C148 C149 C144 120.2(6) . . ? 
C148 C149 H149 119.9 . . ? 
C144 C149 H149 119.9 . . ? 
N31 C150 C147 122.6(6) . . ? 
N31 C150 H150 118.7 . . ? 
C147 C150 H150 118.7 . . ? 
C156 C151 C152 119.9(6) . . ? 
C156 C151 N23 120.8(6) . . ? 
C152 C151 N23 119.3(6) . . ? 
C151 C152 C153 119.4(6) . . ? 
C151 C152 H152 120.3 . . ? 
C153 C152 H152 120.3 . . ? 
C154 C153 C152 120.9(6) . . ? 
C154 C153 H153 119.6 . . ? 
C152 C153 H153 119.6 . . ? 
C153 C154 C155 118.9(6) . . ? 
C153 C154 C157 122.8(6) . . ? 
C155 C154 C157 118.0(6) . . ? 
C154 C155 C156 120.5(6) . . ? 
C154 C155 H155 119.7 . . ? 
C156 C155 H155 119.7 . . ? 
C151 C156 C155 120.4(6) . . ? 
C151 C156 H156 119.8 . . ? 
C155 C156 H156 119.8 . . ? 
N40 C157 C154 123.1(7) . . ? 
N40 C157 H157 118.4 . . ? 
C154 C157 H157 118.4 . . ? 
C163 C158 C159 118.8(6) . . ? 
C163 C158 N23 121.0(5) . . ? 
C159 C158 N23 120.1(5) . . ? 
C160 C159 C158 121.2(6) . . ? 
C160 C159 H159 119.4 . . ? 
C158 C159 H159 119.4 . . ? 
C159 C160 C161 120.3(6) . . ? 
C159 C160 H160 119.8 . . ? 
C161 C160 H160 119.8 . . ? 
C162 C161 C160 117.4(6) . . ? 
C162 C161 C164 120.8(5) . . ? 
C160 C161 C164 121.6(5) . . ? 
C163 C162 C161 121.6(6) . . ? 
C163 C162 H162 119.2 . . ? 
C161 C162 H162 119.2 . . ? 
C162 C163 C158 120.7(6) . . ? 
C162 C163 H163 119.7 . . ? 
C158 C163 H163 119.7 . . ? 
N37 C164 C161 123.0(6) . . ? 
N37 C164 H164 118.5 . . ? 
C161 C164 H164 118.5 . . ? 
C170 C165 C166 119.2(6) . . ? 
C170 C165 N23 121.4(6) . . ? 
C166 C165 N23 119.3(6) . . ? 
C167 C166 C165 120.1(6) . . ? 
C167 C166 H166 120.0 . . ? 
C165 C166 H166 120.0 . . ? 
C166 C167 C168 121.0(6) . . ? 
C166 C167 H167 119.5 . . ? 
C168 C167 H167 119.5 . . ? 
C169 C168 C167 118.1(6) . . ? 
C169 C168 C171 119.3(6) . . ? 
C167 C168 C171 122.5(6) . . ? 
C168 C169 C170 121.0(6) . . ? 
C168 C169 H169 119.5 . . ? 
C170 C169 H169 119.5 . . ? 
C165 C170 C169 120.5(6) . . ? 
C165 C170 H170 119.8 . . ? 
C169 C170 H170 119.8 . . ? 
N34 C171 C168 123.2(6) . . ? 
N34 C171 H171 118.4 . . ? 
C168 C171 H171 118.4 . . ? 
C177 C172 C173 117.9(6) . . ? 
C177 C172 N24 121.0(6) . . ? 
C173 C172 N24 121.1(5) . . ? 
C174 C173 C172 120.8(6) . . ? 
C174 C173 H173 119.6 . . ? 
C172 C173 H173 119.6 . . ? 
C175 C174 C173 121.0(6) . . ? 
C175 C174 H174 119.5 . . ? 
C173 C174 H174 119.5 . . ? 
C176 C175 C174 117.3(6) . . ? 
C176 C175 C178 119.9(6) . . ? 
C174 C175 C178 122.6(6) . . ? 
C177 C176 C175 122.0(6) . . ? 
C177 C176 H176 119.0 . . ? 
C175 C176 H176 119.0 . . ? 
C176 C177 C172 121.0(6) . . ? 
C176 C177 H177 119.5 . . ? 
C172 C177 H177 119.5 . . ? 
N39 C178 C175 123.5(7) . . ? 
N39 C178 H178 118.3 . . ? 
C175 C178 H178 118.3 . . ? 
C184 C179 C180 118.8(6) . . ? 
C184 C179 N24 119.8(5) . . ? 
C180 C179 N24 121.3(6) . . ? 
C181 C180 C179 120.9(6) . . ? 
C181 C180 H180 119.6 . . ? 
C179 C180 H180 119.6 . . ? 
C180 C181 C182 121.0(6) . . ? 
C180 C181 H181 119.5 . . ? 
C182 C181 H181 119.5 . . ? 
C181 C182 C183 117.7(6) . . ? 
C181 C182 C185 123.4(6) . . ? 
C183 C182 C185 118.7(6) . . ? 
C184 C183 C182 121.8(6) . . ? 
C184 C183 H183 119.1 . . ? 
C182 C183 H183 119.1 . . ? 
C179 C184 C183 119.8(6) . . ? 
C179 C184 H184 120.1 . . ? 
C183 C184 H184 120.1 . . ? 
N32 C185 C182 124.2(6) . . ? 
N32 C185 H185 117.9 . . ? 
C182 C185 H185 117.9 . . ? 
C191 C186 C187 120.3(6) . . ? 
C191 C186 N24 120.4(6) . . ? 
C187 C186 N24 119.2(5) . . ? 
C186 C187 C188 118.9(6) . . ? 
C186 C187 H187 120.5 . . ? 
C188 C187 H187 120.5 . . ? 
C187 C188 C189 121.0(6) . . ? 
C187 C188 H188 119.5 . . ? 
C189 C188 H188 119.5 . . ? 
C188 C189 C190 118.6(6) . . ? 
C188 C189 C192 121.4(6) . . ? 
C190 C189 C192 119.7(5) . . ? 
C191 C190 C189 119.8(6) . . ? 
C191 C190 H190 120.1 . . ? 
C189 C190 H190 120.1 . . ? 
C186 C191 C190 121.2(6) . . ? 
C186 C191 H191 119.4 . . ? 
C190 C191 H191 119.4 . . ? 
N30 C192 C189 121.9(6) . . ? 
N30 C192 H192 119.1 . . ? 
C189 C192 H192 119.1 . . ? 
N25 C193 C194 111.7(5) . . ? 
N25 C193 H19A 109.3 . . ? 
C194 C193 H19A 109.3 . . ? 
N25 C193 H19B 109.3 . . ? 
C194 C193 H19B 109.3 . . ? 
H19A C193 H19B 107.9 . . ? 
N29 C194 C193 111.1(5) . . ? 
N29 C194 H19C 109.4 . . ? 
C193 C194 H19C 109.4 . . ? 
N29 C194 H19D 109.4 . . ? 
C193 C194 H19D 109.4 . . ? 
H19C C194 H19D 108.0 . . ? 
N25 C195 C196 111.8(5) . . ? 
N25 C195 H19E 109.3 . . ? 
C196 C195 H19E 109.3 . . ? 
N25 C195 H19F 109.3 . . ? 
C196 C195 H19F 109.3 . . ? 
H19E C195 H19F 107.9 . . ? 
N31 C196 C195 110.1(5) . . ? 
N31 C196 H19G 109.6 . . ? 
C195 C196 H19G 109.6 . . ? 
N31 C196 H19H 109.6 . . ? 
C195 C196 H19H 109.6 . . ? 
H19G C196 H19H 108.1 . . ? 
N25 C197 C198 110.3(5) . . ? 
N25 C197 H19I 109.6 . . ? 
C198 C197 H19I 109.6 . . ? 
N25 C197 H19J 109.6 . . ? 
C198 C197 H19J 109.6 . . ? 
H19I C197 H19J 108.1 . . ? 
N30 C198 C197 110.2(5) . . ? 
N30 C198 H19K 109.6 . . ? 
C197 C198 H19K 109.6 . . ? 
N30 C198 H19L 109.6 . . ? 
C197 C198 H19L 109.6 . . ? 
H19K C198 H19L 108.1 . . ? 
N26 C199 C200 111.9(5) . . ? 
N26 C199 H19M 109.2 . . ? 
C200 C199 H19M 109.2 . . ? 
N26 C199 H19N 109.2 . . ? 
C200 C199 H19N 109.2 . . ? 
H19M C199 H19N 107.9 . . ? 
N33 C200 C199 109.6(5) . . ? 
N33 C200 H20A 109.8 . . ? 
C199 C200 H20A 109.8 . . ? 
N33 C200 H20B 109.8 . . ? 
C199 C200 H20B 109.8 . . ? 
H20A C200 H20B 108.2 . . ? 
N26 C201 C202 113.2(5) . . ? 
N26 C201 H20C 108.9 . . ? 
C202 C201 H20C 108.9 . . ? 
N26 C201 H20D 108.9 . . ? 
C202 C201 H20D 108.9 . . ? 
H20C C201 H20D 107.8 . . ? 
N34 C202 C201 110.0(5) . . ? 
N34 C202 H20E 109.7 . . ? 
C201 C202 H20E 109.7 . . ? 
N34 C202 H20F 109.7 . . ? 
C201 C202 H20F 109.7 . . ? 
H20E C202 H20F 108.2 . . ? 
N26 C203 C204 111.9(5) . . ? 
N26 C203 H20G 109.2 . . ? 
C204 C203 H20G 109.2 . . ? 
N26 C203 H20H 109.2 . . ? 
C204 C203 H20H 109.2 . . ? 
H20G C203 H20H 107.9 . . ? 
N32 C204 C203 111.4(5) . . ? 
N32 C204 H20I 109.4 . . ? 
C203 C204 H20I 109.4 . . ? 
N32 C204 H20J 109.4 . . ? 
C203 C204 H20J 109.4 . . ? 
H20I C204 H20J 108.0 . . ? 
N27 C205 C206 111.2(5) . . ? 
N27 C205 H20K 109.4 . . ? 
C206 C205 H20K 109.4 . . ? 
N27 C205 H20L 109.4 . . ? 
C206 C205 H20L 109.4 . . ? 
H20K C205 H20L 108.0 . . ? 
N35 C206 C205 111.7(5) . . ? 
N35 C206 H20M 109.3 . . ? 
C205 C206 H20M 109.3 . . ? 
N35 C206 H20N 109.3 . . ? 
C205 C206 H20N 109.3 . . ? 
H20M C206 H20N 107.9 . . ? 
N27 C207 C208 111.7(5) . . ? 
N27 C207 H20O 109.3 . . ? 
C208 C207 H20O 109.3 . . ? 
N27 C207 H20P 109.3 . . ? 
C208 C207 H20P 109.3 . . ? 
H20O C207 H20P 107.9 . . ? 
N37 C208 C207 111.7(5) . . ? 
N37 C208 H20Q 109.3 . . ? 
C207 C208 H20Q 109.3 . . ? 
N37 C208 H20R 109.3 . . ? 
C207 C208 H20R 109.3 . . ? 
H20Q C208 H20R 107.9 . . ? 
N27 C209 C210 111.6(5) . . ? 
N27 C209 H20S 109.3 . . ? 
C210 C209 H20S 109.3 . . ? 
N27 C209 H20T 109.3 . . ? 
C210 C209 H20T 109.3 . . ? 
H20S C209 H20T 108.0 . . ? 
N36 C210 C209 111.2(5) . . ? 
N36 C210 H21A 109.4 . . ? 
C209 C210 H21A 109.4 . . ? 
N36 C210 H21B 109.4 . . ? 
C209 C210 H21B 109.4 . . ? 
H21A C210 H21B 108.0 . . ? 
N28 C211 C212 112.7(7) . . ? 
N28 C211 H21C 109.0 . . ? 
C212 C211 H21C 109.0 . . ? 
N28 C211 H21D 109.0 . . ? 
C212 C211 H21D 109.0 . . ? 
H21C C211 H21D 107.8 . . ? 
N38 C212 C211 111.6(7) . . ? 
N38 C212 H21E 109.3 . . ? 
C211 C212 H21E 109.3 . . ? 
N38 C212 H21F 109.3 . . ? 
C211 C212 H21F 109.3 . . ? 
H21E C212 H21F 108.0 . . ? 
N28 C213 C214 111.0(6) . . ? 
N28 C213 H21G 109.4 . . ? 
C214 C213 H21G 109.4 . . ? 
N28 C213 H21H 109.4 . . ? 
C214 C213 H21H 109.4 . . ? 
H21G C213 H21H 108.0 . . ? 
N40 C214 C213 111.7(6) . . ? 
N40 C214 H21I 109.3 . . ? 
C213 C214 H21I 109.3 . . ? 
N40 C214 H21J 109.3 . . ? 
C213 C214 H21J 109.3 . . ? 
H21I C214 H21J 107.9 . . ? 
N28 C215 C216 113.7(6) . . ? 
N28 C215 H21K 108.8 . . ? 
C216 C215 H21K 108.8 . . ? 
N28 C215 H21L 108.8 . . ? 
C216 C215 H21L 108.8 . . ? 
H21K C215 H21L 107.7 . . ? 
N39 C216 C215 111.2(6) . . ? 
N39 C216 H21M 109.4 . . ? 
C215 C216 H21M 109.4 . . ? 
N39 C216 H21N 109.4 . . ? 
C215 C216 H21N 109.4 . . ? 
H21M C216 H21N 108.0 . . ? 
C217 N41 C224 122.7(5) . . ? 
C217 N41 C231 119.5(5) . . ? 
C224 N41 C231 117.8(5) . . ? 
C245 N42 C238 119.2(7) . . ? 
C245 N42 C252 119.2(6) . . ? 
C238 N42 C252 121.0(6) . . ? 
C259 N43 C266 122.3(5) . . ? 
C259 N43 C273 120.3(5) . . ? 
C266 N43 C273 117.4(5) . . ? 
C294 N44 C280 116.7(5) . . ? 
C294 N44 C287 122.5(5) . . ? 
C280 N44 C287 118.9(5) . . ? 
C303 N45 C301 110.0(6) . . ? 
C303 N45 C305 110.3(6) . . ? 
C301 N45 C305 110.2(6) . . ? 
C311 N46 C309 110.1(5) . . ? 
C311 N46 C307 110.3(5) . . ? 
C309 N46 C307 110.6(5) . . ? 
C317 N47 C313 111.5(5) . . ? 
C317 N47 C315 110.9(5) . . ? 
C313 N47 C315 111.0(5) . . ? 
C319 N48 C321 112.5(5) . . ? 
C319 N48 C323 109.1(6) . . ? 
C321 N48 C323 109.3(6) . . ? 
C223 N49 C302 117.7(7) . . ? 
C300 N50 C306 118.0(6) . . ? 
C258 N51 C304 116.7(8) . . ? 
C293 N52 C312 117.1(6) . . ? 
C244 N53 C308 116.4(6) . . ? 
C272 N54 C310 117.6(6) . . ? 
C237 N55 C318 117.5(5) . . ? 
C286 N56 C314 117.3(6) . . ? 
C279 N57 C316 117.7(5) . . ? 
C265 N58 C324 116.7(7) . . ? 
C251 N59 C322 117.4(7) . . ? 
C230 N60 C320 116.6(6) . . ? 
C218 C217 N41 120.1(6) . . ? 
C218 C217 C222 118.7(6) . . ? 
N41 C217 C222 121.1(6) . . ? 
C219 C218 C217 121.6(6) . . ? 
C219 C218 H218 119.2 . . ? 
C217 C218 H218 119.2 . . ? 
C218 C219 C220 119.8(6) . . ? 
C218 C219 H219 120.1 . . ? 
C220 C219 H219 120.1 . . ? 
C221 C220 C219 118.5(6) . . ? 
C221 C220 C223 120.5(6) . . ? 
C219 C220 C223 120.9(7) . . ? 
C220 C221 C222 122.3(6) . . ? 
C220 C221 H221 118.8 . . ? 
C222 C221 H221 118.8 . . ? 
C221 C222 C217 118.9(7) . . ? 
C221 C222 H222 120.5 . . ? 
C217 C222 H222 120.5 . . ? 
N49 C223 C220 124.1(7) . . ? 
N49 C223 H223 118.0 . . ? 
C220 C223 H223 118.0 . . ? 
C229 C224 C225 118.8(6) . . ? 
C229 C224 N41 119.6(5) . . ? 
C225 C224 N41 121.6(6) . . ? 
C226 C225 C224 120.3(6) . . ? 
C226 C225 H225 119.8 . . ? 
C224 C225 H225 119.8 . . ? 
C225 C226 C227 120.6(6) . . ? 
C225 C226 H226 119.7 . . ? 
C227 C226 H226 119.7 . . ? 
C228 C227 C226 118.1(6) . . ? 
C228 C227 C230 119.7(6) . . ? 
C226 C227 C230 122.2(6) . . ? 
C229 C228 C227 122.1(6) . . ? 
C229 C228 H228 119.0 . . ? 
C227 C228 H228 119.0 . . ? 
C228 C229 C224 120.1(6) . . ? 
C228 C229 H229 120.0 . . ? 
C224 C229 H229 120.0 . . ? 
N60 C230 C227 121.9(6) . . ? 
N60 C230 H230 119.0 . . ? 
C227 C230 H230 119.0 . . ? 
C236 C231 C232 119.4(6) . . ? 
C236 C231 N41 122.0(5) . . ? 
C232 C231 N41 118.6(5) . . ? 
C233 C232 C231 120.3(6) . . ? 
C233 C232 H232 119.9 . . ? 
C231 C232 H232 119.9 . . ? 
C232 C233 C234 121.2(6) . . ? 
C232 C233 H233 119.4 . . ? 
C234 C233 H233 119.4 . . ? 
C233 C234 C235 118.4(6) . . ? 
C233 C234 C237 121.7(6) . . ? 
C235 C234 C237 119.9(6) . . ? 
C236 C235 C234 120.8(6) . . ? 
C236 C235 H235 119.6 . . ? 
C234 C235 H235 119.6 . . ? 
C231 C236 C235 119.9(6) . . ? 
C231 C236 H236 120.0 . . ? 
C235 C236 H236 120.0 . . ? 
N55 C237 C234 121.9(6) . . ? 
N55 C237 H237 119.0 . . ? 
C234 C237 H237 119.0 . . ? 
C243 C238 C239 119.5(7) . . ? 
C243 C238 N42 119.9(7) . . ? 
C239 C238 N42 120.6(7) . . ? 
C240 C239 C238 118.9(7) . . ? 
C240 C239 H239 120.6 . . ? 
C238 C239 H239 120.6 . . ? 
C241 C240 C239 122.0(7) . . ? 
C241 C240 H240 119.0 . . ? 
C239 C240 H240 119.0 . . ? 
C240 C241 C242 117.6(7) . . ? 
C240 C241 C244 123.9(6) . . ? 
C242 C241 C244 118.4(7) . . ? 
C243 C242 C241 120.7(7) . . ? 
C243 C242 H242 119.7 . . ? 
C241 C242 H242 119.7 . . ? 
C238 C243 C242 121.0(7) . . ? 
C238 C243 H243 119.5 . . ? 
C242 C243 H243 119.5 . . ? 
N53 C244 C241 123.3(7) . . ? 
N53 C244 H244 118.4 . . ? 
C241 C244 H244 118.4 . . ? 
C246 C245 C250 118.8(7) . . ? 
C246 C245 N42 122.4(6) . . ? 
C250 C245 N42 118.9(7) . . ? 
C245 C246 C247 121.5(7) . . ? 
C245 C246 H246 119.3 . . ? 
C247 C246 H246 119.3 . . ? 
C246 C247 C248 119.8(7) . . ? 
C246 C247 H247 120.1 . . ? 
C248 C247 H247 120.1 . . ? 
C249 C248 C247 118.3(7) . . ? 
C249 C248 C251 118.5(7) . . ? 
C247 C248 C251 123.2(7) . . ? 
C248 C249 C250 121.2(7) . . ? 
C248 C249 H249 119.4 . . ? 
C250 C249 H249 119.4 . . ? 
C245 C250 C249 120.4(7) . . ? 
C245 C250 H250 119.8 . . ? 
C249 C250 H250 119.8 . . ? 
N59 C251 C248 125.7(7) . . ? 
N59 C251 H251 117.2 . . ? 
C248 C251 H251 117.2 . . ? 
C257 C252 C253 118.3(8) . . ? 
C257 C252 N42 122.1(7) . . ? 
C253 C252 N42 119.6(7) . . ? 
C254 C253 C252 120.6(7) . . ? 
C254 C253 H253 119.7 . . ? 
C252 C253 H253 119.7 . . ? 
C253 C254 C255 121.6(7) . . ? 
C253 C254 H254 119.2 . . ? 
C255 C254 H254 119.2 . . ? 
C256 C255 C254 116.5(8) . . ? 
C256 C255 C258 118.8(8) . . ? 
C254 C255 C258 124.5(7) . . ? 
C255 C256 C257 123.5(8) . . ? 
C255 C256 H256 118.2 . . ? 
C257 C256 H256 118.2 . . ? 
C252 C257 C256 118.9(7) . . ? 
C252 C257 H257 120.5 . . ? 
C256 C257 H257 120.5 . . ? 
N51 C258 C255 124.4(8) . . ? 
N51 C258 H258 117.8 . . ? 
C255 C258 H258 117.8 . . ? 
C260 C259 N43 120.3(6) . . ? 
C260 C259 C264 117.9(6) . . ? 
N43 C259 C264 121.8(6) . . ? 
C261 C260 C259 120.0(6) . . ? 
C261 C260 H260 120.0 . . ? 
C259 C260 H260 120.0 . . ? 
C260 C261 C262 122.2(6) . . ? 
C260 C261 H261 118.9 . . ? 
C262 C261 H261 118.9 . . ? 
C263 C262 C261 117.4(6) . . ? 
C263 C262 C265 118.8(7) . . ? 
C261 C262 C265 123.8(7) . . ? 
C264 C263 C262 121.5(7) . . ? 
C264 C263 H263 119.3 . . ? 
C262 C263 H263 119.3 . . ? 
C263 C264 C259 120.9(6) . . ? 
C263 C264 H264 119.6 . . ? 
C259 C264 H264 119.6 . . ? 
N58 C265 C262 122.6(7) . . ? 
N58 C265 H265 118.7 . . ? 
C262 C265 H265 118.7 . . ? 
C267 C266 C271 118.7(6) . . ? 
C267 C266 N43 121.0(6) . . ? 
C271 C266 N43 120.4(6) . . ? 
C266 C267 C268 120.5(6) . . ? 
C266 C267 H267 119.8 . . ? 
C268 C267 H267 119.8 . . ? 
C269 C268 C267 120.7(6) . . ? 
C269 C268 H268 119.7 . . ? 
C267 C268 H268 119.7 . . ? 
C268 C269 C270 118.9(6) . . ? 
C268 C269 C272 121.4(6) . . ? 
C270 C269 C272 119.6(6) . . ? 
C269 C270 C271 120.7(6) . . ? 
C269 C270 H270 119.7 . . ? 
C271 C270 H270 119.7 . . ? 
C270 C271 C266 120.6(6) . . ? 
C270 C271 H271 119.7 . . ? 
C266 C271 H271 119.7 . . ? 
N54 C272 C269 123.9(6) . . ? 
N54 C272 H272 118.1 . . ? 
C269 C272 H272 118.1 . . ? 
C278 C273 C274 119.3(6) . . ? 
C278 C273 N43 121.0(6) . . ? 
C274 C273 N43 119.6(6) . . ? 
C275 C274 C273 120.2(6) . . ? 
C275 C274 H274 119.9 . . ? 
C273 C274 H274 119.9 . . ? 
C276 C275 C274 121.0(6) . . ? 
C276 C275 H275 119.5 . . ? 
C274 C275 H275 119.5 . . ? 
C275 C276 C277 118.4(6) . . ? 
C275 C276 C279 122.5(6) . . ? 
C277 C276 C279 119.1(6) . . ? 
C278 C277 C276 121.1(6) . . ? 
C278 C277 H277 119.4 . . ? 
C276 C277 H277 119.4 . . ? 
C273 C278 C277 119.9(6) . . ? 
C273 C278 H278 120.1 . . ? 
C277 C278 H278 120.1 . . ? 
N57 C279 C276 121.4(6) . . ? 
N57 C279 H279 119.3 . . ? 
C276 C279 H279 119.3 . . ? 
C285 C280 C281 119.7(6) . . ? 
C285 C280 N44 121.0(6) . . ? 
C281 C280 N44 119.2(6) . . ? 
C280 C281 C282 119.7(6) . . ? 
C280 C281 H281 120.1 . . ? 
C282 C281 H281 120.1 . . ? 
C283 C282 C281 120.3(6) . . ? 
C283 C282 H282 119.9 . . ? 
C281 C282 H282 119.9 . . ? 
C284 C283 C282 119.7(6) . . ? 
C284 C283 C286 119.5(6) . . ? 
C282 C283 C286 120.8(6) . . ? 
C283 C284 C285 119.8(6) . . ? 
C283 C284 H284 120.1 . . ? 
C285 C284 H284 120.1 . . ? 
C280 C285 C284 120.6(6) . . ? 
C280 C285 H285 119.7 . . ? 
C284 C285 H285 119.7 . . ? 
N56 C286 C283 122.6(6) . . ? 
N56 C286 H286 118.7 . . ? 
C283 C286 H286 118.7 . . ? 
C292 C287 C288 119.7(6) . . ? 
C292 C287 N44 121.3(6) . . ? 
C288 C287 N44 119.0(5) . . ? 
C289 C288 C287 120.0(6) . . ? 
C289 C288 H288 120.0 . . ? 
C287 C288 H288 120.0 . . ? 
C288 C289 C290 121.2(6) . . ? 
C288 C289 H289 119.4 . . ? 
C290 C289 H289 119.4 . . ? 
C291 C290 C289 117.0(6) . . ? 
C291 C290 C293 122.3(6) . . ? 
C289 C290 C293 120.6(6) . . ? 
C290 C291 C292 122.9(6) . . ? 
C290 C291 H291 118.6 . . ? 
C292 C291 H291 118.6 . . ? 
C287 C292 C291 119.2(6) . . ? 
C287 C292 H292 120.4 . . ? 
C291 C292 H292 120.4 . . ? 
N52 C293 C290 122.1(6) . . ? 
N52 C293 H293 119.0 . . ? 
C290 C293 H293 119.0 . . ? 
C299 C294 C295 118.5(6) . . ? 
C299 C294 N44 120.3(6) . . ? 
C295 C294 N44 121.2(5) . . ? 
C296 C295 C294 119.8(6) . . ? 
C296 C295 H295 120.1 . . ? 
C294 C295 H295 120.1 . . ? 
C295 C296 C297 121.4(6) . . ? 
C295 C296 H296 119.3 . . ? 
C297 C296 H296 119.3 . . ? 
C298 C297 C296 117.9(6) . . ? 
C298 C297 C300 120.3(6) . . ? 
C296 C297 C300 121.8(6) . . ? 
C299 C298 C297 121.4(6) . . ? 
C299 C298 H298 119.3 . . ? 
C297 C298 H298 119.3 . . ? 
C298 C299 C294 120.9(6) . . ? 
C298 C299 H299 119.5 . . ? 
C294 C299 H299 119.5 . . ? 
N50 C300 C297 123.6(6) . . ? 
N50 C300 H300 118.2 . . ? 
C297 C300 H300 118.2 . . ? 
N45 C301 C302 112.1(6) . . ? 
N45 C301 H30A 109.2 . . ? 
C302 C301 H30A 109.2 . . ? 
N45 C301 H30B 109.2 . . ? 
C302 C301 H30B 109.2 . . ? 
H30A C301 H30B 107.9 . . ? 
N49 C302 C301 109.9(6) . . ? 
N49 C302 H30C 109.7 . . ? 
C301 C302 H30C 109.7 . . ? 
N49 C302 H30D 109.7 . . ? 
C301 C302 H30D 109.7 . . ? 
H30C C302 H30D 108.2 . . ? 
N45 C303 C304 111.4(7) . . ? 
N45 C303 H30E 109.4 . . ? 
C304 C303 H30E 109.4 . . ? 
N45 C303 H30F 109.4 . . ? 
C304 C303 H30F 109.4 . . ? 
H30E C303 H30F 108.0 . . ? 
N51 C304 C303 110.7(7) . . ? 
N51 C304 H30G 109.5 . . ? 
C303 C304 H30G 109.5 . . ? 
N51 C304 H30H 109.5 . . ? 
C303 C304 H30H 109.5 . . ? 
H30G C304 H30H 108.1 . . ? 
N45 C305 C306 112.4(6) . . ? 
N45 C305 H30I 109.1 . . ? 
C306 C305 H30I 109.1 . . ? 
N45 C305 H30J 109.1 . . ? 
C306 C305 H30J 109.1 . . ? 
H30I C305 H30J 107.9 . . ? 
N50 C306 C305 109.8(5) . . ? 
N50 C306 H30K 109.7 . . ? 
C305 C306 H30K 109.7 . . ? 
N50 C306 H30L 109.7 . . ? 
C305 C306 H30L 109.7 . . ? 
H30K C306 H30L 108.2 . . ? 
N46 C307 C308 112.1(5) . . ? 
N46 C307 H30M 109.2 . . ? 
C308 C307 H30M 109.2 . . ? 
N46 C307 H30N 109.2 . . ? 
C308 C307 H30N 109.2 . . ? 
H30M C307 H30N 107.9 . . ? 
N53 C308 C307 110.2(6) . . ? 
N53 C308 H30O 109.6 . . ? 
C307 C308 H30O 109.6 . . ? 
N53 C308 H30P 109.6 . . ? 
C307 C308 H30P 109.6 . . ? 
H30O C308 H30P 108.1 . . ? 
N46 C309 C310 111.3(5) . . ? 
N46 C309 H30Q 109.4 . . ? 
C310 C309 H30Q 109.4 . . ? 
N46 C309 H30R 109.4 . . ? 
C310 C309 H30R 109.4 . . ? 
H30Q C309 H30R 108.0 . . ? 
N54 C310 C309 111.2(5) . . ? 
N54 C310 H31A 109.4 . . ? 
C309 C310 H31A 109.4 . . ? 
N54 C310 H31B 109.4 . . ? 
C309 C310 H31B 109.4 . . ? 
H31A C310 H31B 108.0 . . ? 
N46 C311 C312 114.1(5) . . ? 
N46 C311 H31C 108.7 . . ? 
C312 C311 H31C 108.7 . . ? 
N46 C311 H31D 108.7 . . ? 
C312 C311 H31D 108.7 . . ? 
H31C C311 H31D 107.6 . . ? 
N52 C312 C311 110.5(5) . . ? 
N52 C312 H31E 109.6 . . ? 
C311 C312 H31E 109.6 . . ? 
N52 C312 H31F 109.6 . . ? 
C311 C312 H31F 109.6 . . ? 
H31E C312 H31F 108.1 . . ? 
N47 C313 C314 112.9(5) . . ? 
N47 C313 H31G 109.0 . . ? 
C314 C313 H31G 109.0 . . ? 
N47 C313 H31H 109.0 . . ? 
C314 C313 H31H 109.0 . . ? 
H31G C313 H31H 107.8 . . ? 
N56 C314 C313 110.0(5) . . ? 
N56 C314 H31I 109.7 . . ? 
C313 C314 H31I 109.7 . . ? 
N56 C314 H31J 109.7 . . ? 
C313 C314 H31J 109.7 . . ? 
H31I C314 H31J 108.2 . . ? 
N47 C315 C316 111.4(5) . . ? 
N47 C315 H31K 109.4 . . ? 
C316 C315 H31K 109.4 . . ? 
N47 C315 H31L 109.4 . . ? 
C316 C315 H31L 109.4 . . ? 
H31K C315 H31L 108.0 . . ? 
N57 C316 C315 110.4(5) . . ? 
N57 C316 H31M 109.6 . . ? 
C315 C316 H31M 109.6 . . ? 
N57 C316 H31N 109.6 . . ? 
C315 C316 H31N 109.6 . . ? 
H31M C316 H31N 108.1 . . ? 
N47 C317 C318 113.3(5) . . ? 
N47 C317 H31O 108.9 . . ? 
C318 C317 H31O 108.9 . . ? 
N47 C317 H31P 108.9 . . ? 
C318 C317 H31P 108.9 . . ? 
H31O C317 H31P 107.7 . . ? 
N55 C318 C317 109.7(5) . . ? 
N55 C318 H31Q 109.7 . . ? 
C317 C318 H31Q 109.7 . . ? 
N55 C318 H31R 109.7 . . ? 
C317 C318 H31R 109.7 . . ? 
H31Q C318 H31R 108.2 . . ? 
N48 C319 C320 112.1(6) . . ? 
N48 C319 H31S 109.2 . . ? 
C320 C319 H31S 109.2 . . ? 
N48 C319 H31T 109.2 . . ? 
C320 C319 H31T 109.2 . . ? 
H31S C319 H31T 107.9 . . ? 
N60 C320 C319 110.5(6) . . ? 
N60 C320 H32A 109.6 . . ? 
C319 C320 H32A 109.6 . . ? 
N60 C320 H32B 109.6 . . ? 
C319 C320 H32B 109.6 . . ? 
H32A C320 H32B 108.1 . . ? 
N48 C321 C322 111.3(6) . . ? 
N48 C321 H32C 109.4 . . ? 
C322 C321 H32C 109.4 . . ? 
N48 C321 H32D 109.4 . . ? 
C322 C321 H32D 109.4 . . ? 
H32C C321 H32D 108.0 . . ? 
N59 C322 C321 112.2(6) . . ? 
N59 C322 H32E 109.2 . . ? 
C321 C322 H32E 109.2 . . ? 
N59 C322 H32F 109.2 . . ? 
C321 C322 H32F 109.2 . . ? 
H32E C322 H32F 107.9 . . ? 
N48 C323 C324 114.1(6) . . ? 
N48 C323 H32G 108.7 . . ? 
C324 C323 H32G 108.7 . . ? 
N48 C323 H32H 108.7 . . ? 
C324 C323 H32H 108.7 . . ? 
H32G C323 H32H 107.6 . . ? 
N58 C324 C323 109.4(6) . . ? 
N58 C324 H32I 109.8 . . ? 
C323 C324 H32I 109.8 . . ? 
N58 C324 H32J 109.8 . . ? 
C323 C324 H32J 109.8 . . ? 
H32I C324 H32J 108.2 . . ? 
C325 N61 C339 121.1(5) . . ? 
C325 N61 C332 118.3(5) . . ? 
C339 N61 C332 119.3(5) . . ? 
C353 N62 C360 121.7(5) . . ? 
C353 N62 C346 118.4(5) . . ? 
C360 N62 C346 117.4(5) . . ? 
C381 N63 C374 114.9(6) . . ? 
C381 N63 C367 120.8(7) . . ? 
C374 N63 C367 119.3(7) . . ? 
C402 N64 C400 121.9(5) . . ? 
C402 N64 C388 119.9(5) . . ? 
C400 N64 C388 117.1(5) . . ? 
C409 N65 C411 109.8(8) . . ? 
C409 N65 C413 109.1(10) . . ? 
C411 N65 C413 113.0(9) . . ? 
C417 N66 C419 112.0(6) . . ? 
C417 N66 C415 110.1(6) . . ? 
C419 N66 C415 110.4(6) . . ? 
C423 N67 C421 111.3(9) . . ? 
C423 N67 C425 110.5(8) . . ? 
C421 N67 C425 109.2(9) . . ? 
C427 N68 C431 109.6(6) . . ? 
C427 N68 C429 110.6(6) . . ? 
C431 N68 C429 112.1(6) . . ? 
C331 N69 C410 115.3(10) . . ? 
C408 N70 C414 115.9(13) . . ? 
C352 N71 C412 116.3(6) . . ? 
C338 N72 C416 118.2(7) . . ? 
C373 N73 C420 108.5(11) . . ? 
C366 N74 C418 116.2(7) . . ? 
C394 N75 C426 116.9(7) . . ? 
C345 N76 C422 118.3(8) . . ? 
C387 N77 C424 116.0(9) . . ? 
C359 N78 C428 116.2(6) . . ? 
C380 N79 C430 118.1(7) . . ? 
C401 N80 C432 116.2(8) . . ? 
C326 C325 C330 117.4(7) . . ? 
C326 C325 N61 122.2(6) . . ? 
C330 C325 N61 120.4(6) . . ? 
C327 C326 C325 121.3(7) . . ? 
C327 C326 H326 119.4 . . ? 
C325 C326 H326 119.4 . . ? 
C326 C327 C328 121.6(7) . . ? 
C326 C327 H327 119.2 . . ? 
C328 C327 H327 119.2 . . ? 
C327 C328 C329 116.9(7) . . ? 
C327 C328 C331 119.1(8) . . ? 
C329 C328 C331 124.0(8) . . ? 
C330 C329 C328 121.4(7) . . ? 
C330 C329 H329 119.3 . . ? 
C328 C329 H329 119.3 . . ? 
C329 C330 C325 121.4(7) . . ? 
C329 C330 H330 119.3 . . ? 
C325 C330 H330 119.3 . . ? 
N69 C331 C328 122.1(10) . . ? 
N69 C331 H331 119.0 . . ? 
C328 C331 H331 119.0 . . ? 
C333 C332 C337 119.1(7) . . ? 
C333 C332 N61 120.6(6) . . ? 
C337 C332 N61 120.3(6) . . ? 
C332 C333 C334 120.2(6) . . ? 
C332 C333 H333 119.9 . . ? 
C334 C333 H333 119.9 . . ? 
C335 C334 C333 121.3(6) . . ? 
C335 C334 H334 119.3 . . ? 
C333 C334 H334 119.3 . . ? 
C336 C335 C334 117.5(6) . . ? 
C336 C335 C338 122.2(6) . . ? 
C334 C335 C338 120.2(6) . . ? 
C335 C336 C337 121.6(7) . . ? 
C335 C336 H336 119.2 . . ? 
C337 C336 H336 119.2 . . ? 
C332 C337 C336 120.0(7) . . ? 
C332 C337 H337 120.0 . . ? 
C336 C337 H337 120.0 . . ? 
N72 C338 C335 122.0(7) . . ? 
N72 C338 H338 119.0 . . ? 
C335 C338 H338 119.0 . . ? 
C340 C339 C344 119.4(6) . . ? 
C340 C339 N61 119.2(6) . . ? 
C344 C339 N61 121.3(6) . . ? 
C339 C340 C341 120.2(7) . . ? 
C339 C340 H340 119.9 . . ? 
C341 C340 H340 119.9 . . ? 
C342 C341 C340 119.7(7) . . ? 
C342 C341 H341 120.1 . . ? 
C340 C341 H341 120.1 . . ? 
C343 C342 C341 118.8(6) . . ? 
C343 C342 C345 122.4(7) . . ? 
C341 C342 C345 118.8(8) . . ? 
C342 C343 C344 121.5(7) . . ? 
C342 C343 H343 119.3 . . ? 
C344 C343 H343 119.3 . . ? 
C343 C344 C339 120.3(7) . . ? 
C343 C344 H344 119.8 . . ? 
C339 C344 H344 119.8 . . ? 
N76 C345 C342 119.8(8) . . ? 
N76 C345 H345 120.1 . . ? 
C342 C345 H345 120.1 . . ? 
C351 C346 C347 120.3(7) . . ? 
C351 C346 N62 120.6(6) . . ? 
C347 C346 N62 119.1(6) . . ? 
C348 C347 C346 119.7(6) . . ? 
C348 C347 H347 120.2 . . ? 
C346 C347 H347 120.2 . . ? 
C347 C348 C349 121.9(6) . . ? 
C347 C348 H348 119.1 . . ? 
C349 C348 H348 119.1 . . ? 
C348 C349 C350 117.5(6) . . ? 
C348 C349 C352 121.1(6) . . ? 
C350 C349 C352 121.2(6) . . ? 
C351 C350 C349 121.6(6) . . ? 
C351 C350 H350 119.2 . . ? 
C349 C350 H350 119.2 . . ? 
C346 C351 C350 119.0(6) . . ? 
C346 C351 H351 120.5 . . ? 
C350 C351 H351 120.5 . . ? 
N71 C352 C349 121.8(7) . . ? 
N71 C352 H352 119.1 . . ? 
C349 C352 H352 119.1 . . ? 
C354 C353 C358 119.8(6) . . ? 
C354 C353 N62 119.4(6) . . ? 
C358 C353 N62 120.8(6) . . ? 
C353 C354 C355 119.9(6) . . ? 
C353 C354 H354 120.0 . . ? 
C355 C354 H354 120.0 . . ? 
C356 C355 C354 120.2(6) . . ? 
C356 C355 H355 119.9 . . ? 
C354 C355 H355 119.9 . . ? 
C357 C356 C355 118.5(6) . . ? 
C357 C356 C359 123.2(7) . . ? 
C355 C356 C359 118.3(6) . . ? 
C356 C357 C358 121.2(6) . . ? 
C356 C357 H357 119.4 . . ? 
C358 C357 H357 119.4 . . ? 
C357 C358 C353 120.2(6) . . ? 
C357 C358 H358 119.9 . . ? 
C353 C358 H358 119.9 . . ? 
N78 C359 C356 122.2(7) . . ? 
N78 C359 H359 118.9 . . ? 
C356 C359 H359 118.9 . . ? 
C361 C360 C365 118.1(6) . . ? 
C361 C360 N62 121.9(6) . . ? 
C365 C360 N62 120.0(6) . . ? 
C360 C361 C362 120.8(6) . . ? 
C360 C361 H361 119.6 . . ? 
C362 C361 H361 119.6 . . ? 
C363 C362 C361 121.6(7) . . ? 
C363 C362 H362 119.2 . . ? 
C361 C362 H362 119.2 . . ? 
C362 C363 C364 117.2(7) . . ? 
C362 C363 C366 118.9(7) . . ? 
C364 C363 C366 123.9(7) . . ? 
C365 C364 C363 121.7(6) . . ? 
C365 C364 H364 119.2 . . ? 
C363 C364 H364 119.2 . . ? 
C364 C365 C360 120.6(6) . . ? 
C364 C365 H365 119.7 . . ? 
C360 C365 H365 119.7 . . ? 
N74 C366 C363 123.5(7) . . ? 
N74 C366 H366 118.2 . . ? 
C363 C366 H366 118.2 . . ? 
C372 C367 C368 120.3(8) . . ? 
C372 C367 N63 119.7(8) . . ? 
C368 C367 N63 120.0(8) . . ? 
C369 C368 C367 120.0(10) . . ? 
C369 C368 H368 120.0 . . ? 
C367 C368 H368 120.0 . . ? 
C370 C369 C368 121.4(10) . . ? 
C370 C369 H369 119.3 . . ? 
C368 C369 H369 119.3 . . ? 
C369 C370 C371 119.7(9) . . ? 
C369 C370 C373 115.3(10) . . ? 
C371 C370 C373 124.8(10) . . ? 
C372 C371 C370 120.7(9) . . ? 
C372 C371 H371 119.7 . . ? 
C370 C371 H371 119.7 . . ? 
C367 C372 C371 117.8(8) . . ? 
C367 C372 H372 121.1 . . ? 
C371 C372 H372 121.1 . . ? 
N73 C373 C370 115.9(12) . . ? 
N73 C373 H373 122.1 . . ? 
C370 C373 H373 122.1 . . ? 
C375 C374 C379 118.3(7) . . ? 
C375 C374 N63 122.9(7) . . ? 
C379 C374 N63 118.8(7) . . ? 
C376 C375 C374 122.0(7) . . ? 
C376 C375 H375 119.0 . . ? 
C374 C375 H375 119.0 . . ? 
C375 C376 C377 120.7(7) . . ? 
C375 C376 H376 119.7 . . ? 
C377 C376 H376 119.7 . . ? 
C376 C377 C378 118.1(7) . . ? 
C376 C377 C380 121.2(7) . . ? 
C378 C377 C380 120.6(7) . . ? 
C379 C378 C377 120.4(8) . . ? 
C379 C378 H378 119.8 . . ? 
C377 C378 H378 119.8 . . ? 
C378 C379 C374 120.4(7) . . ? 
C378 C379 H379 119.8 . . ? 
C374 C379 H379 119.8 . . ? 
N79 C380 C377 122.2(7) . . ? 
N79 C380 H380 118.9 . . ? 
C377 C380 H380 118.9 . . ? 
C386 C381 C382 118.2(8) . . ? 
C386 C381 N63 121.3(7) . . ? 
C382 C381 N63 120.5(8) . . ? 
C383 C382 C381 119.7(8) . . ? 
C383 C382 H382 120.1 . . ? 
C381 C382 H382 120.1 . . ? 
C382 C383 C384 120.6(8) . . ? 
C382 C383 H383 119.7 . . ? 
C384 C383 H383 119.7 . . ? 
C385 C384 C383 119.4(8) . . ? 
C385 C384 C387 118.0(9) . . ? 
C383 C384 C387 122.4(8) . . ? 
C384 C385 C386 119.9(9) . . ? 
C384 C385 H385 120.0 . . ? 
C386 C385 H385 120.0 . . ? 
C381 C386 C385 121.9(8) . . ? 
C381 C386 H386 119.0 . . ? 
C385 C386 H386 119.0 . . ? 
N77 C387 C384 121.2(10) . . ? 
N77 C387 H387 119.4 . . ? 
C384 C387 H387 119.4 . . ? 
C389 C388 C393 119.2(6) . . ? 
C389 C388 N64 121.5(6) . . ? 
C393 C388 N64 119.3(6) . . ? 
C388 C389 C390 121.5(6) . . ? 
C388 C389 H389 119.2 . . ? 
C390 C389 H389 119.2 . . ? 
C389 C390 C391 119.9(7) . . ? 
C389 C390 H390 120.1 . . ? 
C391 C390 H390 120.1 . . ? 
C392 C391 C390 118.3(6) . . ? 
C392 C391 C394 122.8(6) . . ? 
C390 C391 C394 118.9(6) . . ? 
C391 C392 C393 121.4(7) . . ? 
C391 C392 H392 119.3 . . ? 
C393 C392 H392 119.3 . . ? 
C388 C393 C392 119.6(7) . . ? 
C388 C393 H393 120.2 . . ? 
C392 C393 H393 120.2 . . ? 
N75 C394 C391 120.6(7) . . ? 
N75 C394 H394 119.7 . . ? 
C391 C394 H394 119.7 . . ? 
C396 C395 C400 121.4(7) . . ? 
C396 C395 H395 119.3 . . ? 
C400 C395 H395 119.3 . . ? 
C397 C396 C395 120.5(8) . . ? 
C397 C396 H396 119.8 . . ? 
C395 C396 H396 119.8 . . ? 
C396 C397 C398 117.9(7) . . ? 
C396 C397 C401 118.3(8) . . ? 
C398 C397 C401 123.6(7) . . ? 
C399 C398 C397 121.4(7) . . ? 
C399 C398 H398 119.3 . . ? 
C397 C398 H398 119.3 . . ? 
C400 C399 C398 119.9(7) . . ? 
C400 C399 H399 120.1 . . ? 
C398 C399 H399 120.1 . . ? 
C399 C400 C395 118.9(7) . . ? 
C399 C400 N64 122.1(7) . . ? 
C395 C400 N64 119.0(6) . . ? 
N80 C401 C397 122.0(8) . . ? 
N80 C401 H401 119.0 . . ? 
C397 C401 H401 119.0 . . ? 
C407 C402 C403 118.8(7) . . ? 
C407 C402 N64 121.5(6) . . ? 
C403 C402 N64 119.8(7) . . ? 
C404 C403 C402 119.5(8) . . ? 
C404 C403 H403 120.2 . . ? 
C402 C403 H403 120.2 . . ? 
C405 C404 C403 122.6(8) . . ? 
C405 C404 H404 118.7 . . ? 
C403 C404 H404 118.7 . . ? 
C404 C405 C406 118.3(8) . . ? 
C404 C405 C408 119.4(9) . . ? 
C406 C405 C408 122.2(10) . . ? 
C407 C406 C405 120.0(8) . . ? 
C407 C406 H406 120.0 . . ? 
C405 C406 H406 120.0 . . ? 
C406 C407 C402 120.7(7) . . ? 
C406 C407 H407 119.6 . . ? 
C402 C407 H407 119.6 . . ? 
N70 C408 C405 124.3(11) . . ? 
N70 C408 H408 117.8 . . ? 
C405 C408 H408 117.8 . . ? 
N65 C409 C410 113.3(10) . . ? 
N65 C409 H40A 108.9 . . ? 
C410 C409 H40A 108.9 . . ? 
N65 C409 H40B 108.9 . . ? 
C410 C409 H40B 108.9 . . ? 
H40A C409 H40B 107.7 . . ? 
N69 C410 C409 109.9(8) . . ? 
N69 C410 H41A 109.7 . . ? 
C409 C410 H41A 109.7 . . ? 
N69 C410 H41B 109.7 . . ? 
C409 C410 H41B 109.7 . . ? 
H41A C410 H41B 108.2 . . ? 
N65 C411 C412 113.6(7) . . ? 
N65 C411 H41C 108.9 . . ? 
C412 C411 H41C 108.9 . . ? 
N65 C411 H41D 108.9 . . ? 
C412 C411 H41D 108.9 . . ? 
H41C C411 H41D 107.7 . . ? 
N71 C412 C411 111.0(7) . . ? 
N71 C412 H41E 109.4 . . ? 
C411 C412 H41E 109.4 . . ? 
N71 C412 H41F 109.4 . . ? 
C411 C412 H41F 109.4 . . ? 
H41E C412 H41F 108.0 . . ? 
N65 C413 C414 112.3(11) . . ? 
N65 C413 H41G 109.1 . . ? 
C414 C413 H41G 109.1 . . ? 
N65 C413 H41H 109.1 . . ? 
C414 C413 H41H 109.1 . . ? 
H41G C413 H41H 107.9 . . ? 
N70 C414 C413 108.5(14) . . ? 
N70 C414 H41I 110.0 . . ? 
C413 C414 H41I 110.0 . . ? 
N70 C414 H41J 110.0 . . ? 
C413 C414 H41J 110.0 . . ? 
H41I C414 H41J 108.4 . . ? 
N66 C415 C416 110.8(6) . . ? 
N66 C415 H41K 109.5 . . ? 
C416 C415 H41K 109.5 . . ? 
N66 C415 H41L 109.5 . . ? 
C416 C415 H41L 109.5 . . ? 
H41K C415 H41L 108.1 . . ? 
N72 C416 C415 108.4(6) . . ? 
N72 C416 H41M 110.0 . . ? 
C415 C416 H41M 110.0 . . ? 
N72 C416 H41N 110.0 . . ? 
C415 C416 H41N 110.0 . . ? 
H41M C416 H41N 108.4 . . ? 
N66 C417 C418 113.0(6) . . ? 
N66 C417 H41O 109.0 . . ? 
C418 C417 H41O 109.0 . . ? 
N66 C417 H41P 109.0 . . ? 
C418 C417 H41P 109.0 . . ? 
H41O C417 H41P 107.8 . . ? 
N74 C418 C417 109.8(7) . . ? 
N74 C418 H41Q 109.7 . . ? 
C417 C418 H41Q 109.7 . . ? 
N74 C418 H41R 109.7 . . ? 
C417 C418 H41R 109.7 . . ? 
H41Q C418 H41R 108.2 . . ? 
N66 C419 C420 112.4(6) . . ? 
N66 C419 H41S 109.1 . . ? 
C420 C419 H41S 109.1 . . ? 
N66 C419 H41T 109.1 . . ? 
C420 C419 H41T 109.1 . . ? 
H41S C419 H41T 107.9 . . ? 
C419 C420 N73 105.6(7) . . ? 
C419 C420 H42A 110.6 . . ? 
N73 C420 H42A 110.6 . . ? 
C419 C420 H42B 110.6 . . ? 
N73 C420 H42B 110.6 . . ? 
H42A C420 H42B 108.7 . . ? 
N67 C421 C422 113.0(8) . . ? 
N67 C421 H42C 109.0 . . ? 
C422 C421 H42C 109.0 . . ? 
N67 C421 H42D 109.0 . . ? 
C422 C421 H42D 109.0 . . ? 
H42C C421 H42D 107.8 . . ? 
C421 C422 N76 111.1(9) . . ? 
C421 C422 H42E 109.4 . . ? 
N76 C422 H42E 109.4 . . ? 
C421 C422 H42F 109.4 . . ? 
N76 C422 H42F 109.4 . . ? 
H42E C422 H42F 108.0 . . ? 
N67 C423 C424 111.4(8) . . ? 
N67 C423 H42G 109.3 . . ? 
C424 C423 H42G 109.3 . . ? 
N67 C423 H42H 109.3 . . ? 
C424 C423 H42H 109.3 . . ? 
H42G C423 H42H 108.0 . . ? 
N77 C424 C423 109.4(8) . . ? 
N77 C424 H42I 109.8 . . ? 
C423 C424 H42I 109.8 . . ? 
N77 C424 H42J 109.8 . . ? 
C423 C424 H42J 109.8 . . ? 
H42I C424 H42J 108.2 . . ? 
N67 C425 C426 112.4(8) . . ? 
N67 C425 H42K 109.1 . . ? 
C426 C425 H42K 109.1 . . ? 
N67 C425 H42L 109.1 . . ? 
C426 C425 H42L 109.1 . . ? 
H42K C425 H42L 107.9 . . ? 
N75 C426 C425 109.9(7) . . ? 
N75 C426 H42M 109.7 . . ? 
C425 C426 H42M 109.7 . . ? 
N75 C426 H42N 109.7 . . ? 
C425 C426 H42N 109.7 . . ? 
H42M C426 H42N 108.2 . . ? 
N68 C427 C428 113.0(6) . . ? 
N68 C427 H42O 109.0 . . ? 
C428 C427 H42O 109.0 . . ? 
N68 C427 H42P 109.0 . . ? 
C428 C427 H42P 109.0 . . ? 
H42O C427 H42P 107.8 . . ? 
N78 C428 C427 109.7(6) . . ? 
N78 C428 H42Q 109.7 . . ? 
C427 C428 H42Q 109.7 . . ? 
N78 C428 H42R 109.7 . . ? 
C427 C428 H42R 109.7 . . ? 
H42Q C428 H42R 108.2 . . ? 
N68 C429 C430 112.6(6) . . ? 
N68 C429 H42S 109.1 . . ? 
C430 C429 H42S 109.1 . . ? 
N68 C429 H42T 109.1 . . ? 
C430 C429 H42T 109.1 . . ? 
H42S C429 H42T 107.8 . . ? 
N79 C430 C429 110.1(7) . . ? 
N79 C430 H43A 109.6 . . ? 
C429 C430 H43A 109.6 . . ? 
N79 C430 H43B 109.6 . . ? 
C429 C430 H43B 109.6 . . ? 
H43A C430 H43B 108.2 . . ? 
N68 C431 C432 111.3(7) . . ? 
N68 C431 H43C 109.4 . . ? 
C432 C431 H43C 109.4 . . ? 
N68 C431 H43D 109.4 . . ? 
C432 C431 H43D 109.4 . . ? 
H43C C431 H43D 108.0 . . ? 
N80 C432 C431 108.9(7) . . ? 
N80 C432 H43E 109.9 . . ? 
C431 C432 H43E 109.9 . . ? 
N80 C432 H43F 109.9 . . ? 
C431 C432 H43F 109.9 . . ? 
H43E C432 H43F 108.3 . . ? 
O12A C512 O12B 53.6(7) . . ? 
O12B O12A C512 69.1(8) . . ? 
O12A O12B C512 57.3(7) . . ? 
O13B C513 O13A 99.1(13) . . ? 
C517 C516 O16 124.7(19) . . ? 
C516 C517 O17 125(2) . . ? 
C519 C518 O18 63.2(17) . . ? 
C518 O18 C519 53.6(13) . . ? 
C518 C519 O18 63.2(16) . . ? 
C518 C519 O19 162(2) . . ? 
O18 C519 O19 126(2) . . ? 
O20 C520 O48 105(2) . . ? 
C520 O20 O47 105(2) . . ? 
O45 C523 O23 125(4) . . ? 
C523 O23 O48 110(4) . . ? 
O23 O48 C520 162(3) . . ? 
 
_diffrn_measured_fraction_theta_max    1.000 
_diffrn_reflns_theta_full              21.97 
_diffrn_measured_fraction_theta_full   1.000 
_refine_diff_density_max    1.055 
_refine_diff_density_min   -0.518 
_refine_diff_density_rms    0.068 

#===END

 
data_CC12 
 
_audit_creation_method            SHELXL-97 
_chemical_name_systematic 
; 
 ? 
; 
_chemical_name_common             ? 
_chemical_melting_point           ? 
_chemical_formula_moiety          ? 
_chemical_formula_sum 
 'C196 H196 N20 O12' 
_chemical_formula_weight          3023.73 
 
loop_ 
 _atom_type_symbol 
 _atom_type_description 
 _atom_type_scat_dispersion_real 
 _atom_type_scat_dispersion_imag 
 _atom_type_scat_source 
 'C'  'C'   0.0033   0.0016 
 'International Tables Vol C Tables 4.2.6.8 and 6.1.1.4' 
 'H'  'H'   0.0000   0.0000 
 'International Tables Vol C Tables 4.2.6.8 and 6.1.1.4' 
 'N'  'N'   0.0061   0.0033 
 'International Tables Vol C Tables 4.2.6.8 and 6.1.1.4' 
 'O'  'O'   0.0106   0.0060 
 'International Tables Vol C Tables 4.2.6.8 and 6.1.1.4' 
 
_symmetry_cell_setting            monoclinic 
_symmetry_space_group_name_H-M    P2/n
 
loop_ 
 _symmetry_equiv_pos_as_xyz 
 'x, y, z' 
 '-x+1/2, y, -z+1/2' 
 '-x, -y, -z' 
 'x-1/2, -y, z-1/2' 
 
_cell_length_a                    25.5517(15) 
_cell_length_b                    12.7178(7) 
_cell_length_c                    26.1062(15) 
_cell_angle_alpha                 90.00 
_cell_angle_beta                  93.196(2) 
_cell_angle_gamma                 90.00 
_cell_volume                      8470.3(8) 
_cell_formula_units_Z             2 
_cell_measurement_temperature     100(2) 
_cell_measurement_reflns_used     9486
_cell_measurement_theta_min       2.40
_cell_measurement_theta_max       24.93
 
_exptl_crystal_description        block 
_exptl_crystal_colour             yellow 
_exptl_crystal_size_max           0.24 
_exptl_crystal_size_mid           0.12 
_exptl_crystal_size_min           0.10 
_exptl_crystal_density_meas       ? 
_exptl_crystal_density_diffrn     1.186 
_exptl_crystal_density_method     'not measured' 
_exptl_crystal_F_000              3216 
_exptl_absorpt_coefficient_mu     0.075 
_exptl_absorpt_correction_type    multi-scan
_exptl_absorpt_correction_T_min   0.4852
_exptl_absorpt_correction_T_max   0.7452
_exptl_absorpt_process_details    'SADABS 2008/1 (Sheldrick, 2008)'
 
_exptl_special_details 
; 
 ? 
; 
 
_diffrn_ambient_temperature       100(2) 
_diffrn_radiation_wavelength      0.71073 
_diffrn_radiation_type            'Mo K\a'
_diffrn_radiation_source          'Rotating Anode'
_diffrn_radiation_monochromator   confocal
_diffrn_measurement_device_type   'Rigaku Saturn724+ (2x2 bin mode)'
_diffrn_measurement_method        'profile data from \w-scans'
_diffrn_detector_area_resol_mean  28.5714
_diffrn_reflns_number             110150 
_diffrn_reflns_av_R_equivalents   0.0562 
_diffrn_reflns_av_sigmaI/netI     0.0385 
_diffrn_reflns_limit_h_min        -30 
_diffrn_reflns_limit_h_max        30 
_diffrn_reflns_limit_k_min        -12 
_diffrn_reflns_limit_k_max        15 
_diffrn_reflns_limit_l_min        -31 
_diffrn_reflns_limit_l_max        31 
_diffrn_reflns_theta_min          1.78 
_diffrn_reflns_theta_max          25.03 
_reflns_number_total              14946 
_reflns_number_gt                 10389 
_reflns_threshold_expression      >2sigma(I) 
 
_computing_data_collection        'CrystalClear-SM Expert 2.1 (Rigaku, 2011)'
_computing_cell_refinement        'Bruker AXS SAINT V7.68A'
_computing_data_reduction         'Bruker AXS SAINT V7.68A'
_computing_structure_solution     'SHELXD (Sheldrick, 2008)'
_computing_structure_refinement   'SHELXL (Sheldrick, 2008)'
_computing_molecular_graphics     ? 
_computing_publication_material   ? 
 
_refine_special_details 
; 
 Refinement of F^2^ against ALL reflections.  The weighted R-factor wR and 
 goodness of fit S are based on F^2^, conventional R-factors R are based 
 on F, with F set to zero for negative F^2^. The threshold expression of 
 F^2^ > 2sigma(F^2^) is used only for calculating R-factors(gt) etc. and is 
 not relevant to the choice of reflections for refinement.  R-factors based 
 on F^2^ are statistically about twice as large as those based on F, and R- 
 factors based on ALL data will be even larger. 
; 
 
_refine_ls_structure_factor_coef  Fsqd  
_refine_ls_matrix_type            full 
_refine_ls_weighting_scheme       calc  
_refine_ls_weighting_details 
 'calc w=1/[\s^2^(Fo^2^)+(0.1000P)^2^+8.0000P] where P=(Fo^2^+2Fc^2^)/3' 
_atom_sites_solution_primary      direct 
_atom_sites_solution_secondary    difmap 
_atom_sites_solution_hydrogens    difmap
_refine_ls_hydrogen_treatment     constr
_refine_ls_extinction_method      none 
_refine_ls_extinction_coef        ? 
_refine_ls_number_reflns          14946 
_refine_ls_number_parameters      1078 
_refine_ls_number_restraints      0 
_refine_ls_R_factor_all           0.1181 
_refine_ls_R_factor_gt            0.0860 
_refine_ls_wR_factor_ref          0.2517 
_refine_ls_wR_factor_gt           0.2275 
_refine_ls_goodness_of_fit_ref    1.144 
_refine_ls_restrained_S_all       1.144 
_refine_ls_shift/su_max           0.000 
_refine_ls_shift/su_mean          0.000 
 
loop_ 
 _atom_site_label 
 _atom_site_type_symbol 
 _atom_site_fract_x 
 _atom_site_fract_y 
 _atom_site_fract_z 
 _atom_site_U_iso_or_equiv 
 _atom_site_adp_type 
 _atom_site_occupancy 
 _atom_site_symmetry_multiplicity 
 _atom_site_calc_flag 
 _atom_site_refinement_flags 
 _atom_site_disorder_assembly 
 _atom_site_disorder_group 
N1 N 0.28644(11) 0.5904(2) 0.63395(11) 0.0499(7) Uani 1 1 d . . . 
N2 N 0.37468(12) 0.9378(2) 0.81651(12) 0.0567(8) Uani 1 1 d . A . 
N3 N 0.65393(13) 0.1427(3) 0.92345(15) 0.0784(11) Uani 1 1 d . . . 
N4 N 0.45827(13) 1.3773(2) 0.39626(12) 0.0598(8) Uani 1 1 d . . . 
N5 N 0.6323(2) 0.2466(4) 0.81499(17) 0.123(2) Uani 1 1 d . . . 
N6 N 0.64289(13) 0.3558(2) 0.97992(12) 0.0621(8) Uani 1 1 d . . . 
N7 N 0.12231(14) 1.4419(3) 1.02273(15) 0.0707(10) Uani 1 1 d . . . 
N8 N 0.39397(13) 1.1845(2) 0.36300(12) 0.0608(8) Uani 1 1 d . . . 
N9 N 0.53201(13) 1.2597(3) 0.47721(12) 0.0655(9) Uani 1 1 d . A . 
N10 N -0.04224(17) 0.0646(3) 0.5702(3) 0.144(3) Uani 1 1 d . . . 
C1 C 0.33299(13) 0.5556(2) 0.66191(13) 0.0462(8) Uani 1 1 d . . . 
C2 C 0.36590(15) 0.6287(3) 0.68573(14) 0.0576(9) Uani 1 1 d . . . 
H2 H 0.3567 0.7011 0.6843 0.069 Uiso 1 1 calc R . . 
C3 C 0.41218(15) 0.5982(3) 0.71176(14) 0.0555(9) Uani 1 1 d . . . 
H3 H 0.4343 0.6501 0.7277 0.067 Uiso 1 1 calc R . . 
C4 C 0.42693(13) 0.4928(2) 0.71503(12) 0.0454(8) Uani 1 1 d . . . 
C5 C 0.39378(16) 0.4227(3) 0.68878(15) 0.0632(11) Uani 1 1 d . . . 
H5 H 0.4033 0.3505 0.6886 0.076 Uiso 1 1 calc R . . 
C6 C 0.34803(15) 0.4525(3) 0.66306(15) 0.0597(10) Uani 1 1 d . . . 
H6 H 0.3266 0.4010 0.6459 0.072 Uiso 1 1 calc R . . 
C7 C 0.47662(14) 0.4581(3) 0.74123(13) 0.0501(8) Uani 1 1 d . . . 
C8 C 0.49938(14) 0.5091(3) 0.78384(13) 0.0520(8) Uani 1 1 d . . . 
H8 H 0.4834 0.5706 0.7964 0.062 Uiso 1 1 calc R . . 
C9 C 0.54491(15) 0.4718(3) 0.80832(14) 0.0594(10) Uani 1 1 d . . . 
H9 H 0.5602 0.5095 0.8368 0.071 Uiso 1 1 calc R . . 
C10 C 0.56879(17) 0.3807(3) 0.79241(16) 0.0698(11) Uani 1 1 d . . . 
C11 C 0.5479(2) 0.3325(4) 0.74771(17) 0.0907(16) Uani 1 1 d . . . 
H11 H 0.5647 0.2724 0.7346 0.109 Uiso 1 1 calc R . . 
C12 C 0.50369(18) 0.3709(3) 0.72278(17) 0.0754(13) Uani 1 1 d . . . 
H12 H 0.4908 0.3378 0.6920 0.090 Uiso 1 1 calc R . . 
C13 C 0.61587(18) 0.3393(4) 0.82060(17) 0.0804(14) Uani 1 1 d . . . 
H13 H 0.6347 0.3844 0.8441 0.096 Uiso 1 1 calc R . . 
C14 C 0.29432(13) 0.6713(2) 0.59654(13) 0.0462(8) Uani 1 1 d . . . 
C15 C 0.31496(13) 0.6482(3) 0.55001(14) 0.0499(8) Uani 1 1 d . . . 
H15 H 0.3227 0.5774 0.5417 0.060 Uiso 1 1 calc R . . 
C16 C 0.32444(13) 0.7274(2) 0.51560(14) 0.0477(8) Uani 1 1 d . . . 
H16 H 0.3378 0.7100 0.4835 0.057 Uiso 1 1 calc R . . 
C17 C 0.31472(12) 0.8326(2) 0.52709(12) 0.0418(7) Uani 1 1 d . . . 
C18 C 0.29377(14) 0.8542(3) 0.57385(13) 0.0502(8) Uani 1 1 d . . . 
H18 H 0.2866 0.9250 0.5826 0.060 Uiso 1 1 calc R . . 
C19 C 0.28312(14) 0.7747(3) 0.60808(14) 0.0520(8) Uani 1 1 d . . . 
H19 H 0.2681 0.7914 0.6396 0.062 Uiso 1 1 calc R . . 
C20 C 0.32545(12) 0.9182(2) 0.49049(12) 0.0419(7) Uani 1 1 d . . . 
C21 C 0.36451(13) 0.9103(3) 0.45579(14) 0.0507(8) Uani 1 1 d . . . 
H21 H 0.3842 0.8471 0.4542 0.061 Uiso 1 1 calc R . . 
C22 C 0.37541(15) 0.9930(3) 0.42329(14) 0.0550(9) Uani 1 1 d . . . 
H22 H 0.4026 0.9862 0.4001 0.066 Uiso 1 1 calc R . . 
C23 C 0.34646(14) 1.0861(3) 0.42467(14) 0.0502(8) Uani 1 1 d . . . 
C24 C 0.30674(14) 1.0928(3) 0.45799(14) 0.0525(9) Uani 1 1 d . . . 
H24 H 0.2861 1.1549 0.4585 0.063 Uiso 1 1 calc R . . 
C25 C 0.29619(14) 1.0110(2) 0.49063(14) 0.0503(8) Uani 1 1 d . . . 
H25 H 0.2687 1.0179 0.5135 0.060 Uiso 1 1 calc R . . 
C26 C 0.35705(15) 1.1787(3) 0.39303(14) 0.0568(9) Uani 1 1 d . . . 
H26 H 0.3346 1.2379 0.3954 0.068 Uiso 1 1 calc R . . 
C27 C 0.24215(13) 0.5249(3) 0.62855(13) 0.0478(8) Uani 1 1 d . . . 
C28 C 0.22833(15) 0.4617(3) 0.66963(14) 0.0612(10) Uani 1 1 d . . . 
H28 H 0.2488 0.4640 0.7011 0.073 Uiso 1 1 calc R . . 
C29 C 0.18543(15) 0.3963(3) 0.66490(16) 0.0635(10) Uani 1 1 d . . . 
H29 H 0.1770 0.3544 0.6934 0.076 Uiso 1 1 calc R . . 
C30 C 0.15432(13) 0.3898(3) 0.62015(14) 0.0513(8) Uani 1 1 d . . . 
C31 C 0.16685(13) 0.4546(3) 0.58002(14) 0.0509(8) Uani 1 1 d . . . 
H31 H 0.1453 0.4538 0.5491 0.061 Uiso 1 1 calc R . . 
C32 C 0.21008(14) 0.5207(3) 0.58386(13) 0.0510(8) Uani 1 1 d . . . 
H32 H 0.2179 0.5637 0.5555 0.061 Uiso 1 1 calc R . . 
C33 C 0.10850(14) 0.3171(3) 0.61565(17) 0.0608(10) Uani 1 1 d . . . 
C34 C 0.07800(16) 0.3031(4) 0.65717(19) 0.0773(13) Uani 1 1 d . . . 
H34 H 0.0857 0.3405 0.6882 0.093 Uiso 1 1 calc R . . 
C35 C 0.03592(19) 0.2338(5) 0.6533(3) 0.111(2) Uani 1 1 d . . . 
H35 H 0.0158 0.2233 0.6824 0.133 Uiso 1 1 calc R . . 
C36 C 0.02237(19) 0.1804(4) 0.6092(3) 0.104(2) Uani 1 1 d . . . 
C37 C 0.05283(17) 0.1933(3) 0.5675(3) 0.0987(19) Uani 1 1 d . . . 
H37 H 0.0448 0.1551 0.5368 0.118 Uiso 1 1 calc R . . 
C38 C 0.09526(15) 0.2621(3) 0.5704(2) 0.0779(13) Uani 1 1 d . . . 
H38 H 0.1154 0.2718 0.5413 0.094 Uiso 1 1 calc R . . 
C39 C -0.0229(2) 0.1088(5) 0.6084(4) 0.149(4) Uani 1 1 d . . . 
H39 H -0.0384 0.0958 0.6401 0.178 Uiso 1 1 calc R . . 
C40 C 0.40598(16) 0.8620(3) 0.84458(14) 0.0581(10) Uani 1 1 d . . . 
C41A C 0.4640(2) 0.8677(4) 0.8398(2) 0.0517(15) Uani 0.663(7) 1 d P A 1 
H41A H 0.4793 0.9226 0.8210 0.062 Uiso 0.663(7) 1 calc PR A 1 
C41B C 0.4445(4) 0.8814(8) 0.8752(4) 0.042(3) Uiso 0.337(7) 1 d P A 2 
H41B H 0.4528 0.9529 0.8824 0.051 Uiso 0.337(7) 1 calc PR A 2 
C42A C 0.4944(2) 0.7911(4) 0.8635(2) 0.0509(15) Uani 0.663(7) 1 d P A 1 
H42A H 0.5314 0.7915 0.8612 0.061 Uiso 0.663(7) 1 calc PR A 1 
C42B C 0.4756(4) 0.8043(8) 0.8990(4) 0.044(3) Uiso 0.337(7) 1 d P A 2 
H42B H 0.5045 0.8265 0.9208 0.053 Uiso 0.337(7) 1 calc PR A 2 
C43 C 0.46813(15) 0.7055(3) 0.89356(13) 0.0544(9) Uani 1 1 d . . . 
C44A C 0.4177(2) 0.7093(5) 0.8942(3) 0.0522(15) Uani 0.663(7) 1 d P A 1 
H44A H 0.4005 0.6556 0.9121 0.063 Uiso 0.663(7) 1 calc PR A 1 
C44B C 0.4133(5) 0.6740(11) 0.8706(5) 0.051(3) Uiso 0.337(7) 1 d P A 2 
H44B H 0.4017 0.6030 0.8715 0.062 Uiso 0.337(7) 1 calc PR A 2 
C45A C 0.3871(2) 0.7868(5) 0.8703(3) 0.0534(15) Uani 0.663(7) 1 d P A 1 
H45A H 0.3502 0.7840 0.8732 0.064 Uiso 0.663(7) 1 calc PR A 1 
C45B C 0.3815(5) 0.7518(9) 0.8488(5) 0.043(3) Uiso 0.337(7) 1 d P A 2 
H45B H 0.3463 0.7380 0.8370 0.052 Uiso 0.337(7) 1 calc PR A 2 
C46 C 0.50125(14) 0.6195(3) 0.91608(13) 0.0495(8) Uani 1 1 d . A . 
C47 C 0.55480(14) 0.6315(3) 0.92792(13) 0.0523(8) Uani 1 1 d . . . 
H47 H 0.5706 0.6984 0.9237 0.063 Uiso 1 1 calc R A . 
C48 C 0.58560(14) 0.5477(3) 0.94571(13) 0.0515(8) Uani 1 1 d . A . 
H48 H 0.6221 0.5579 0.9530 0.062 Uiso 1 1 calc R . . 
C49 C 0.56389(14) 0.4498(3) 0.95289(13) 0.0503(8) Uani 1 1 d . . . 
C50 C 0.51067(15) 0.4382(3) 0.94233(15) 0.0592(9) Uani 1 1 d . A . 
H50 H 0.4947 0.3721 0.9480 0.071 Uiso 1 1 calc R . . 
C51 C 0.48015(15) 0.5206(3) 0.92377(15) 0.0604(10) Uani 1 1 d . . . 
H51 H 0.4438 0.5094 0.9161 0.072 Uiso 1 1 calc R A . 
C52 C 0.59373(15) 0.3574(3) 0.97226(13) 0.0536(9) Uani 1 1 d . A . 
H52 H 0.5748 0.2953 0.9794 0.064 Uiso 1 1 calc R . . 
C53 C 0.39320(13) 0.9704(3) 0.76900(14) 0.0497(8) Uani 1 1 d . . . 
C54 C 0.40511(15) 0.8964(3) 0.73282(15) 0.0599(10) Uani 1 1 d . A . 
H54 H 0.3993 0.8240 0.7395 0.072 Uiso 1 1 calc R . . 
C55 C 0.42523(15) 0.9257(3) 0.68748(16) 0.0588(10) Uani 1 1 d . . . 
H55 H 0.4326 0.8734 0.6629 0.071 Uiso 1 1 calc R A . 
C56 C 0.43520(13) 1.0308(3) 0.67660(14) 0.0518(9) Uani 1 1 d . A . 
C57 C 0.42283(14) 1.1038(3) 0.71379(16) 0.0601(10) Uani 1 1 d . . . 
H57 H 0.4294 1.1761 0.7077 0.072 Uiso 1 1 calc R A . 
C58 C 0.40171(14) 1.0757(3) 0.75834(15) 0.0569(9) Uani 1 1 d . A . 
H58 H 0.3928 1.1282 0.7822 0.068 Uiso 1 1 calc R . . 
C59 C 0.45601(13) 1.0649(3) 0.62742(15) 0.0541(9) Uani 1 1 d . . . 
C60 C 0.43703(14) 1.0226(3) 0.58096(15) 0.0576(9) Uani 1 1 d . A . 
H60 H 0.4132 0.9653 0.5809 0.069 Uiso 1 1 calc R . . 
C61 C 0.45215(14) 1.0622(3) 0.53511(15) 0.0580(9) Uani 1 1 d . . . 
H61 H 0.4385 1.0316 0.5039 0.070 Uiso 1 1 calc R A . 
C62 C 0.48660(13) 1.1451(3) 0.53334(15) 0.0565(9) Uani 1 1 d . A . 
C63 C 0.50775(14) 1.1862(3) 0.57987(15) 0.0586(10) Uani 1 1 d . . . 
H63 H 0.5325 1.2418 0.5796 0.070 Uiso 1 1 calc R A . 
C64 C 0.49291(14) 1.1464(3) 0.62572(15) 0.0568(9) Uani 1 1 d . A . 
H64 H 0.5079 1.1745 0.6569 0.068 Uiso 1 1 calc R . . 
C65 C 0.50038(14) 1.1855(3) 0.48308(15) 0.0585(10) Uani 1 1 d . . . 
H65 H 0.4844 1.1535 0.4532 0.070 Uiso 1 1 calc R A . 
C66 C 0.33762(13) 0.9998(2) 0.84148(13) 0.0478(8) Uani 1 1 d . . . 
C67 C 0.29463(14) 1.0416(3) 0.81302(14) 0.0536(9) Uani 1 1 d . A . 
H67 H 0.2901 1.0266 0.7774 0.064 Uiso 1 1 calc R . . 
C68 C 0.25893(14) 1.1039(3) 0.83559(14) 0.0549(9) Uani 1 1 d . . . 
H68 H 0.2300 1.1311 0.8153 0.066 Uiso 1 1 calc R A . 
C69 C 0.26398(13) 1.1286(2) 0.88768(14) 0.0480(8) Uani 1 1 d . A . 
C70 C 0.30642(14) 1.0852(3) 0.91581(14) 0.0534(9) Uani 1 1 d . . . 
H70 H 0.3107 1.0993 0.9515 0.064 Uiso 1 1 calc R A . 
C71 C 0.34288(15) 1.0213(3) 0.89298(14) 0.0561(9) Uani 1 1 d . A . 
H71 H 0.3715 0.9927 0.9132 0.067 Uiso 1 1 calc R . . 
C72 C 0.22545(13) 1.1959(3) 0.91215(14) 0.0498(8) Uani 1 1 d . . . 
C73 C 0.17172(14) 1.1865(3) 0.89937(15) 0.0548(9) Uani 1 1 d . A . 
H73 H 0.1599 1.1376 0.8737 0.066 Uiso 1 1 calc R . . 
C74 C 0.13572(15) 1.2471(3) 0.92335(15) 0.0577(9) Uani 1 1 d . . . 
H74 H 0.0995 1.2396 0.9140 0.069 Uiso 1 1 calc R A . 
C75 C 0.15152(14) 1.3182(3) 0.96065(15) 0.0571(10) Uani 1 1 d . A . 
C76 C 0.20488(16) 1.3298(3) 0.97349(16) 0.0627(10) Uani 1 1 d . . . 
H76 H 0.2165 1.3795 0.9988 0.075 Uiso 1 1 calc R A . 
C77 C 0.24099(15) 1.2687(3) 0.94908(15) 0.0577(9) Uani 1 1 d . A . 
H77 H 0.2773 1.2772 0.9580 0.069 Uiso 1 1 calc R . . 
C78 C 0.11108(17) 1.3804(3) 0.98584(17) 0.0629(10) Uani 1 1 d . . . 
H78 H 0.0755 1.3738 0.9737 0.075 Uiso 1 1 calc R A . 
C79 C 0.6781(2) 0.1212(5) 0.8746(2) 0.110(2) Uani 1 1 d . . . 
H79A H 0.6570 0.0672 0.8554 0.132 Uiso 1 1 calc R . . 
H79B H 0.7136 0.0921 0.8819 0.132 Uiso 1 1 calc R . . 
C80 C 0.6820(2) 0.2176(6) 0.8415(2) 0.121(2) Uani 1 1 d . . . 
H80A H 0.6946 0.2772 0.8633 0.146 Uiso 1 1 calc R . . 
H80B H 0.7083 0.2047 0.8158 0.146 Uiso 1 1 calc R . . 
C81 C 0.69127(15) 0.1963(3) 0.95852(17) 0.0704(12) Uani 1 1 d . . . 
H81A H 0.7123 0.2455 0.9387 0.084 Uiso 1 1 calc R . . 
H81B H 0.7155 0.1437 0.9747 0.084 Uiso 1 1 calc R . . 
C82 C 0.66556(18) 0.2565(3) 0.99988(17) 0.0721(12) Uani 1 1 d . . . 
H82A H 0.6376 0.2129 1.0138 0.086 Uiso 1 1 calc R . . 
H82B H 0.6918 0.2719 1.0282 0.086 Uiso 1 1 calc R . . 
C83 C 0.63706(19) 0.0450(4) 0.9469(3) 0.108(2) Uani 1 1 d . . . 
H83A H 0.6307 0.0591 0.9833 0.130 Uiso 1 1 calc R . . 
H83B H 0.6660 -0.0066 0.9462 0.130 Uiso 1 1 calc R . . 
C84 C 0.5882(2) -0.0040(4) 0.9215(4) 0.166(4) Uani 1 1 d . . . 
H84A H 0.5925 -0.0124 0.8843 0.200 Uiso 1 1 calc R . . 
H84B H 0.5824 -0.0745 0.9363 0.200 Uiso 1 1 calc R . . 
C85 C 0.45031(16) 1.3350(3) 0.34422(14) 0.0617(10) Uani 1 1 d . . . 
H85A H 0.4783 1.2832 0.3385 0.074 Uiso 1 1 calc R . . 
H85B H 0.4539 1.3930 0.3194 0.074 Uiso 1 1 calc R . . 
C86 C 0.39742(17) 1.2825(3) 0.33358(16) 0.0677(11) Uani 1 1 d . . . 
H86A H 0.3692 1.3310 0.3430 0.081 Uiso 1 1 calc R . . 
H86B H 0.3924 1.2668 0.2965 0.081 Uiso 1 1 calc R . . 
C87 C 0.51477(16) 1.3897(4) 0.40941(16) 0.0717(12) Uani 1 1 d . A . 
H87A H 0.5196 1.4406 0.4380 0.086 Uiso 1 1 calc R . . 
H87B H 0.5318 1.4193 0.3795 0.086 Uiso 1 1 calc R . . 
C88 C 0.54160(16) 1.2880(4) 0.42484(16) 0.0719(11) Uani 1 1 d . . . 
H88A H 0.5287 1.2311 0.4015 0.086 Uiso 1 1 calc R A . 
H88B H 0.5798 1.2953 0.4213 0.086 Uiso 1 1 calc R . . 
C89 C 0.43009(18) 1.4756(3) 0.40159(18) 0.0735(12) Uani 1 1 d . . . 
H89A H 0.3958 1.4706 0.3822 0.088 Uiso 1 1 calc R . . 
H89B H 0.4502 1.5331 0.3863 0.088 Uiso 1 1 calc R . . 
C90 C 0.42114(19) 1.5025(3) 0.45709(18) 0.0796(14) Uani 1 1 d . . . 
H90A H 0.4536 1.4881 0.4784 0.095 Uiso 1 1 calc R . . 
H90B H 0.4133 1.5785 0.4597 0.095 Uiso 1 1 calc R . . 
O1 O 0.5969(4) -0.0718(8) 0.7609(3) 0.118(3) Uani 0.50 1 d P B 1 
O2 O 0.6262(2) 0.1466(4) 0.6918(2) 0.153(2) Uani 1 1 d . B 1 
O3 O 0.7002(5) 0.3547(6) 0.6314(3) 0.223(5) Uani 0.75 1 d P B 1 
C101 C 0.5824(3) 0.0068(6) 0.7337(3) 0.131(3) Uani 1 1 d . B 1 
C102 C 0.6351(3) 0.0465(7) 0.7168(3) 0.136(3) Uani 1 1 d . B 1 
C103 C 0.6735(3) 0.2005(8) 0.6746(3) 0.111(3) Uani 0.75 1 d P B 1 
C104 C 0.6565(5) 0.3006(7) 0.6522(5) 0.157(4) Uani 0.75 1 d P B 1 
O4 O 0.5692(3) 0.0436(6) 0.7880(3) 0.106(2) Uani 0.50 1 d P C 2 
O5 O 0.6884(10) 0.424(2) 0.7135(10) 0.179(9) Uiso 0.25 1 d P D 2 
O6 O 0.7789(14) 0.610(3) 0.5985(14) 0.220(12) Uiso 0.25 1 d P D 2 
O7 O 0.7732(9) 0.4926(19) 0.5448(10) 0.166(8) Uiso 0.25 1 d P D 2 
O8 O 0.7180(10) 0.576(2) 0.6016(9) 0.163(8) Uiso 0.25 1 d P D 2 
O9 O 0.790(2) 0.493(5) 0.595(2) 0.33(3) Uiso 0.25 1 d P D 2 
O10 O 0.9489(6) 0.8773(12) 0.7254(5) 0.096(4) Uiso 0.25 1 d P D 2 
O11 O 0.8278(14) 0.786(3) 0.6658(15) 0.211(13) Uiso 0.25 1 d P D 2 
O12 O 0.7579(14) 0.840(3) 0.7251(11) 0.231(14) Uiso 0.25 1 d P . 2 
O13 O 0.8150(11) 0.772(2) 0.6300(13) 0.166(9) Uiso 0.25 1 d P D 2 
C105 C 0.7119(7) 0.4590(16) 0.6102(7) 0.156(6) Uiso 0.50 1 d P D 2 
C106 C 0.7545(7) 0.5075(13) 0.5973(6) 0.118(4) Uiso 0.50 1 d P D 2 
C107 C 0.6866(7) 0.3122(16) 0.7130(7) 0.079(5) Uiso 0.25 1 d P D 2 
C108 C 0.7148(10) 0.452(2) 0.6626(10) 0.204(9) Uiso 0.50 1 d P D 2 
C109 C 0.7540(10) 0.515(2) 0.6479(10) 0.205(9) Uiso 0.50 1 d P D 2 
C110 C 0.7243(13) 0.482(3) 0.7522(16) 0.170(13) Uiso 0.25 1 d P . 2 
C111 C 0.9294(12) 0.769(2) 0.6965(11) 0.135(9) Uiso 0.25 1 d P D 2 
C112 C 0.8884(8) 0.7826(17) 0.6512(8) 0.088(5) Uiso 0.25 1 d P D 2 
C113 C 0.7901(12) 0.830(2) 0.6689(11) 0.119(8) Uiso 0.25 1 d P D 2 
C114 C 0.7830(11) 0.764(2) 0.7067(11) 0.118(8) Uiso 0.25 1 d P D 2 
C115 C 0.8067(17) 0.723(4) 0.5901(18) 0.179(14) Uiso 0.25 1 d P D 2 
C116 C 0.7713(19) 0.689(4) 0.6221(19) 0.189(16) Uiso 0.25 1 d P D 2 
C117 C 0.8085(19) 0.644(4) 0.6405(17) 0.186(15) Uiso 0.25 1 d P D 2 
 
loop_ 
 _atom_site_aniso_label 
 _atom_site_aniso_U_11 
 _atom_site_aniso_U_22 
 _atom_site_aniso_U_33 
 _atom_site_aniso_U_23 
 _atom_site_aniso_U_13 
 _atom_site_aniso_U_12 
N1 0.0526(16) 0.0361(15) 0.0600(17) 0.0063(13) -0.0055(13) -0.0019(13) 
N2 0.070(2) 0.0385(15) 0.0612(18) -0.0017(14) -0.0031(15) 0.0137(14) 
N3 0.062(2) 0.061(2) 0.109(3) -0.034(2) -0.031(2) 0.0231(17) 
N4 0.071(2) 0.0451(17) 0.0654(19) -0.0068(14) 0.0226(16) -0.0109(15) 
N5 0.129(4) 0.134(4) 0.102(3) -0.053(3) -0.050(3) 0.085(3) 
N6 0.070(2) 0.0488(18) 0.066(2) -0.0113(15) -0.0125(16) 0.0132(15) 
N7 0.078(2) 0.0483(19) 0.089(3) 0.0196(19) 0.0325(19) 0.0104(17) 
N8 0.069(2) 0.0453(17) 0.068(2) 0.0031(15) 0.0047(17) -0.0091(15) 
N9 0.0586(19) 0.073(2) 0.066(2) -0.0122(17) 0.0172(16) -0.0089(17) 
N10 0.059(3) 0.058(3) 0.310(9) 0.028(4) -0.043(4) -0.001(2) 
C1 0.0545(19) 0.0329(17) 0.0510(19) -0.0003(14) -0.0005(15) -0.0022(15) 
C2 0.067(2) 0.0336(18) 0.071(2) -0.0066(17) -0.0100(19) 0.0060(16) 
C3 0.064(2) 0.0376(18) 0.064(2) -0.0094(16) -0.0044(18) -0.0001(16) 
C4 0.056(2) 0.0314(16) 0.0488(18) -0.0036(14) -0.0002(15) 0.0031(14) 
C5 0.081(3) 0.0327(18) 0.073(2) -0.0126(17) -0.021(2) 0.0109(18) 
C6 0.071(2) 0.0391(19) 0.067(2) -0.0096(17) -0.0175(19) 0.0049(17) 
C7 0.059(2) 0.0381(18) 0.0528(19) -0.0080(15) -0.0021(16) 0.0030(16) 
C8 0.064(2) 0.0395(18) 0.052(2) -0.0104(15) -0.0015(17) 0.0092(16) 
C9 0.067(2) 0.058(2) 0.052(2) -0.0170(18) -0.0065(18) 0.0082(19) 
C10 0.070(3) 0.074(3) 0.064(2) -0.019(2) -0.009(2) 0.025(2) 
C11 0.109(4) 0.080(3) 0.079(3) -0.040(2) -0.032(3) 0.050(3) 
C12 0.089(3) 0.057(2) 0.076(3) -0.029(2) -0.028(2) 0.027(2) 
C13 0.075(3) 0.095(3) 0.070(3) -0.027(2) -0.009(2) 0.035(3) 
C14 0.0458(18) 0.0333(17) 0.059(2) 0.0029(15) -0.0059(15) -0.0020(14) 
C15 0.056(2) 0.0290(16) 0.064(2) -0.0029(15) 0.0030(17) 0.0034(14) 
C16 0.0495(19) 0.0354(17) 0.058(2) -0.0024(15) 0.0051(15) 0.0027(14) 
C17 0.0374(16) 0.0320(16) 0.0553(19) -0.0029(14) -0.0038(14) -0.0019(13) 
C18 0.060(2) 0.0302(17) 0.060(2) -0.0041(15) 0.0009(17) 0.0009(15) 
C19 0.060(2) 0.0410(19) 0.056(2) -0.0011(16) 0.0056(16) 0.0028(16) 
C20 0.0416(17) 0.0321(16) 0.0513(18) -0.0041(14) -0.0035(14) -0.0060(13) 
C21 0.0490(19) 0.0356(17) 0.067(2) -0.0027(16) 0.0018(17) -0.0017(15) 
C22 0.058(2) 0.046(2) 0.061(2) 0.0021(17) 0.0067(17) -0.0035(17) 
C23 0.053(2) 0.0379(18) 0.059(2) -0.0025(15) -0.0025(16) -0.0056(15) 
C24 0.059(2) 0.0295(17) 0.069(2) -0.0002(16) 0.0006(18) -0.0020(15) 
C25 0.052(2) 0.0349(17) 0.064(2) -0.0059(16) 0.0032(16) -0.0036(15) 
C26 0.061(2) 0.044(2) 0.065(2) 0.0020(17) 0.0006(19) -0.0039(17) 
C27 0.0500(19) 0.0364(17) 0.057(2) 0.0009(15) 0.0058(16) 0.0023(15) 
C28 0.064(2) 0.064(2) 0.054(2) 0.0094(18) -0.0021(18) -0.006(2) 
C29 0.057(2) 0.067(3) 0.068(2) 0.022(2) 0.0073(19) -0.0056(19) 
C30 0.0456(19) 0.0390(18) 0.070(2) 0.0061(16) 0.0070(17) 0.0060(15) 
C31 0.0475(19) 0.048(2) 0.058(2) 0.0004(16) 0.0024(16) 0.0015(16) 
C32 0.055(2) 0.0435(19) 0.054(2) 0.0034(16) 0.0017(16) -0.0012(16) 
C33 0.045(2) 0.043(2) 0.095(3) 0.018(2) 0.0049(19) 0.0049(16) 
C34 0.053(2) 0.084(3) 0.093(3) 0.046(3) -0.003(2) -0.002(2) 
C35 0.056(3) 0.137(5) 0.136(5) 0.096(4) -0.022(3) -0.021(3) 
C36 0.049(3) 0.075(3) 0.182(6) 0.071(4) -0.036(3) -0.012(2) 
C37 0.048(2) 0.050(3) 0.195(6) -0.010(3) -0.021(3) 0.007(2) 
C38 0.046(2) 0.054(2) 0.133(4) -0.018(3) 0.002(2) 0.0051(19) 
C39 0.083(4) 0.097(4) 0.256(9) 0.111(5) -0.080(5) -0.035(3) 
C40 0.076(3) 0.0361(19) 0.061(2) -0.0084(17) -0.0085(19) 0.0154(18) 
C41A 0.051(3) 0.040(3) 0.064(4) 0.002(2) 0.006(3) -0.005(2) 
C42A 0.045(3) 0.041(3) 0.066(4) -0.006(2) 0.003(3) 0.000(2) 
C43 0.069(3) 0.0394(19) 0.054(2) -0.0095(16) -0.0043(17) 0.0102(17) 
C44A 0.050(3) 0.050(3) 0.057(4) 0.010(3) 0.012(3) 0.001(3) 
C45A 0.048(3) 0.051(4) 0.061(4) 0.001(3) 0.007(3) 0.003(3) 
C46 0.060(2) 0.0408(18) 0.0476(18) -0.0098(15) -0.0019(16) 0.0067(16) 
C47 0.064(2) 0.0413(19) 0.051(2) -0.0047(15) 0.0028(17) 0.0014(16) 
C48 0.055(2) 0.049(2) 0.0495(19) -0.0044(16) -0.0014(16) 0.0049(17) 
C49 0.061(2) 0.0415(19) 0.0475(19) -0.0062(15) -0.0023(16) 0.0064(16) 
C50 0.062(2) 0.0367(19) 0.078(3) -0.0056(17) -0.0041(19) 0.0028(17) 
C51 0.057(2) 0.040(2) 0.082(3) -0.0101(18) -0.0090(19) 0.0044(17) 
C52 0.066(2) 0.0415(19) 0.053(2) -0.0071(16) -0.0023(17) 0.0061(17) 
C53 0.0501(19) 0.0367(18) 0.062(2) -0.0079(16) -0.0008(16) 0.0032(15) 
C54 0.072(2) 0.0363(19) 0.071(2) -0.0079(17) 0.001(2) 0.0057(17) 
C55 0.065(2) 0.0383(19) 0.074(3) -0.0170(18) 0.0054(19) 0.0068(17) 
C56 0.0438(18) 0.0413(19) 0.071(2) -0.0140(17) 0.0068(16) -0.0022(15) 
C57 0.062(2) 0.0342(18) 0.086(3) -0.0148(18) 0.022(2) -0.0096(16) 
C58 0.059(2) 0.0373(19) 0.075(2) -0.0168(17) 0.0132(19) -0.0007(16) 
C59 0.0460(19) 0.0415(19) 0.075(2) -0.0157(17) 0.0083(17) 0.0012(15) 
C60 0.052(2) 0.043(2) 0.078(3) -0.0220(19) 0.0077(18) -0.0043(16) 
C61 0.056(2) 0.049(2) 0.070(2) -0.0222(18) 0.0094(18) -0.0040(17) 
C62 0.0438(19) 0.056(2) 0.071(2) -0.0200(19) 0.0141(17) 0.0013(17) 
C63 0.046(2) 0.053(2) 0.078(3) -0.0176(19) 0.0152(18) -0.0081(16) 
C64 0.050(2) 0.052(2) 0.069(2) -0.0179(18) 0.0073(17) -0.0043(17) 
C65 0.047(2) 0.059(2) 0.070(2) -0.0208(19) 0.0128(18) -0.0005(18) 
C66 0.052(2) 0.0316(16) 0.060(2) -0.0007(15) 0.0040(16) -0.0014(14) 
C67 0.055(2) 0.051(2) 0.055(2) 0.0069(16) 0.0023(16) 0.0026(17) 
C68 0.049(2) 0.053(2) 0.063(2) 0.0159(18) 0.0071(17) 0.0022(17) 
C69 0.0450(18) 0.0334(17) 0.066(2) 0.0098(15) 0.0073(16) -0.0045(14) 
C70 0.059(2) 0.0396(18) 0.061(2) -0.0047(16) 0.0017(17) -0.0004(16) 
C71 0.062(2) 0.0401(19) 0.065(2) -0.0043(17) -0.0067(18) 0.0094(17) 
C72 0.052(2) 0.0373(18) 0.061(2) 0.0124(16) 0.0139(16) -0.0027(15) 
C73 0.051(2) 0.048(2) 0.066(2) 0.0148(17) 0.0101(17) -0.0006(16) 
C74 0.053(2) 0.048(2) 0.073(2) 0.0158(19) 0.0108(18) 0.0038(17) 
C75 0.052(2) 0.045(2) 0.076(3) 0.0254(19) 0.0186(18) 0.0068(16) 
C76 0.072(3) 0.043(2) 0.074(3) 0.0058(18) 0.022(2) -0.0007(18) 
C77 0.052(2) 0.045(2) 0.077(3) 0.0090(19) 0.0128(18) -0.0027(17) 
C78 0.071(3) 0.043(2) 0.078(3) 0.017(2) 0.025(2) 0.0098(18) 
C79 0.094(4) 0.117(4) 0.115(4) -0.058(4) -0.043(3) 0.073(3) 
C80 0.107(4) 0.165(6) 0.090(4) -0.023(4) -0.016(3) 0.087(4) 
C81 0.053(2) 0.059(2) 0.097(3) -0.019(2) -0.021(2) 0.0165(19) 
C82 0.078(3) 0.051(2) 0.085(3) -0.007(2) -0.024(2) 0.016(2) 
C83 0.070(3) 0.053(3) 0.196(6) -0.031(3) -0.036(3) 0.021(2) 
C84 0.069(3) 0.063(3) 0.358(12) -0.062(5) -0.065(5) 0.023(3) 
C85 0.080(3) 0.046(2) 0.060(2) 0.0049(17) 0.0153(19) -0.0082(19) 
C86 0.082(3) 0.052(2) 0.069(2) 0.0110(19) 0.006(2) -0.009(2) 
C87 0.072(3) 0.079(3) 0.067(2) -0.015(2) 0.032(2) -0.031(2) 
C88 0.058(2) 0.085(3) 0.075(3) -0.009(2) 0.022(2) -0.006(2) 
C89 0.088(3) 0.042(2) 0.093(3) 0.003(2) 0.035(2) -0.011(2) 
C90 0.091(3) 0.053(2) 0.099(3) -0.020(2) 0.047(3) -0.020(2) 
O1 0.130(7) 0.123(7) 0.100(5) 0.001(5) -0.003(5) -0.011(6) 
O2 0.158(5) 0.119(4) 0.175(4) -0.069(3) -0.055(4) 0.065(3) 
O3 0.395(16) 0.096(5) 0.175(8) 0.035(5) -0.015(9) 0.003(7) 
C101 0.155(7) 0.092(5) 0.139(6) -0.043(4) -0.053(5) 0.041(4) 
C102 0.145(6) 0.161(7) 0.101(4) -0.020(4) 0.003(4) 0.071(6) 
C103 0.073(4) 0.170(9) 0.087(5) -0.022(5) -0.013(4) -0.008(5) 
C104 0.213(12) 0.063(5) 0.199(11) 0.011(6) 0.047(9) 0.020(6) 
O4 0.109(5) 0.100(5) 0.112(5) -0.057(4) 0.020(4) -0.016(4) 
 
_geom_special_details 
; 
 All esds (except the esd in the dihedral angle between two l.s. planes) 
 are estimated using the full covariance matrix.  The cell esds are taken 
 into account individually in the estimation of esds in distances, angles 
 and torsion angles; correlations between esds in cell parameters are only 
 used when they are defined by crystal symmetry.  An approximate (isotropic) 
 treatment of cell esds is used for estimating esds involving l.s. planes. 
; 
 
loop_ 
 _geom_bond_atom_site_label_1 
 _geom_bond_atom_site_label_2 
 _geom_bond_distance 
 _geom_bond_site_symmetry_2 
 _geom_bond_publ_flag 
N1 C27 1.406(4) . ? 
N1 C1 1.430(4) . ? 
N1 C14 1.441(4) . ? 
N2 C53 1.414(5) . ? 
N2 C66 1.418(4) . ? 
N2 C40 1.428(4) . ? 
N3 C81 1.455(5) . ? 
N3 C83 1.460(7) . ? 
N3 C79 1.473(7) . ? 
N4 C89 1.453(5) . ? 
N4 C85 1.465(5) . ? 
N4 C87 1.474(5) . ? 
N5 C13 1.263(6) . ? 
N5 C80 1.459(6) . ? 
N6 C52 1.261(5) . ? 
N6 C82 1.473(5) . ? 
N7 C78 1.261(5) . ? 
N7 C90 1.473(5) 2_556 ? 
N8 C26 1.262(5) . ? 
N8 C86 1.469(5) . ? 
N9 C65 1.258(5) . ? 
N9 C88 1.448(5) . ? 
N10 C39 1.225(10) . ? 
N10 C84 1.487(7) 2_556 ? 
C1 C6 1.367(5) . ? 
C1 C2 1.378(5) . ? 
C2 C3 1.386(5) . ? 
C3 C4 1.393(5) . ? 
C4 C5 1.385(5) . ? 
C4 C7 1.476(5) . ? 
C5 C6 1.369(5) . ? 
C7 C8 1.387(5) . ? 
C7 C12 1.406(5) . ? 
C8 C9 1.380(5) . ? 
C9 C10 1.383(5) . ? 
C10 C11 1.398(6) . ? 
C10 C13 1.472(6) . ? 
C11 C12 1.363(6) . ? 
C14 C15 1.383(5) . ? 
C14 C19 1.383(5) . ? 
C15 C16 1.380(5) . ? 
C16 C17 1.396(4) . ? 
C17 C18 1.387(5) . ? 
C17 C20 1.485(4) . ? 
C18 C19 1.386(5) . ? 
C20 C21 1.388(5) . ? 
C20 C25 1.397(4) . ? 
C21 C22 1.389(5) . ? 
C22 C23 1.398(5) . ? 
C23 C24 1.376(5) . ? 
C23 C26 1.471(5) . ? 
C24 C25 1.381(5) . ? 
C27 C32 1.389(5) . ? 
C27 C28 1.401(5) . ? 
C28 C29 1.376(5) . ? 
C29 C30 1.378(5) . ? 
C30 C31 1.385(5) . ? 
C30 C33 1.491(5) . ? 
C31 C32 1.387(5) . ? 
C33 C34 1.381(6) . ? 
C33 C38 1.399(6) . ? 
C34 C35 1.389(7) . ? 
C35 C36 1.364(9) . ? 
C36 C37 1.384(9) . ? 
C36 C39 1.472(7) . ? 
C37 C38 1.392(6) . ? 
C40 C41B 1.257(10) . ? 
C40 C45A 1.279(7) . ? 
C40 C41A 1.497(7) . ? 
C40 C45B 1.542(13) . ? 
C41A C42A 1.372(7) . ? 
C41B C42B 1.387(13) . ? 
C42A C43 1.519(7) . ? 
C42B C43 1.277(10) . ? 
C43 C44A 1.291(6) . ? 
C43 C46 1.485(5) . ? 
C43 C44B 1.546(13) . ? 
C44A C45A 1.385(8) . ? 
C44B C45B 1.383(16) . ? 
C46 C51 1.387(5) . ? 
C46 C47 1.394(5) . ? 
C47 C48 1.389(5) . ? 
C48 C49 1.381(5) . ? 
C49 C50 1.380(5) . ? 
C49 C52 1.474(5) . ? 
C50 C51 1.378(5) . ? 
C53 C54 1.380(5) . ? 
C53 C58 1.387(5) . ? 
C54 C55 1.368(5) . ? 
C55 C56 1.393(5) . ? 
C56 C57 1.392(5) . ? 
C56 C59 1.482(5) . ? 
C57 C58 1.357(5) . ? 
C59 C60 1.389(5) . ? 
C59 C64 1.403(5) . ? 
C60 C61 1.374(5) . ? 
C61 C62 1.377(5) . ? 
C62 C63 1.402(5) . ? 
C62 C65 1.470(5) . ? 
C63 C64 1.373(5) . ? 
C66 C71 1.371(5) . ? 
C66 C67 1.397(5) . ? 
C67 C68 1.366(5) . ? 
C68 C69 1.395(5) . ? 
C69 C70 1.390(5) . ? 
C69 C72 1.476(5) . ? 
C70 C71 1.394(5) . ? 
C72 C77 1.379(5) . ? 
C72 C73 1.400(5) . ? 
C73 C74 1.377(5) . ? 
C74 C75 1.373(6) . ? 
C75 C76 1.394(6) . ? 
C75 C78 1.484(5) . ? 
C76 C77 1.389(5) . ? 
C79 C80 1.506(9) . ? 
C81 C82 1.504(6) . ? 
C83 C84 1.516(7) . ? 
C84 N10 1.488(7) 2_556 ? 
C85 C86 1.519(6) . ? 
C87 C88 1.508(6) . ? 
C89 C90 1.519(6) . ? 
C90 N7 1.473(5) 2_556 ? 
O1 C101 1.270(10) . ? 
O2 C102 1.444(9) . ? 
O2 C103 1.481(10) . ? 
O3 C104 1.443(15) . ? 
C101 C102 1.526(11) . ? 
C103 C104 1.457(13) . ? 
O5 C107 1.42(3) . ? 
O5 C110 1.51(4) . ? 
O5 C108 1.56(3) . ? 
O6 C116 1.20(5) . ? 
O6 C117 1.37(5) . ? 
O6 C106 1.45(4) . ? 
O6 O9 1.53(6) . ? 
O6 O8 1.62(4) . ? 
O6 C115 1.62(5) . ? 
O6 C109 1.90(4) . ? 
O7 O9 1.34(6) . ? 
O7 C106 1.49(3) . ? 
O8 C106 1.29(3) . ? 
O8 C105 1.52(3) . ? 
O8 C109 1.67(3) . ? 
O9 C106 0.93(6) . ? 
O9 C109 1.73(6) . ? 
O10 C111 1.63(3) . ? 
O11 O13 0.99(4) . ? 
O11 C113 1.12(4) . ? 
O11 C112 1.61(4) . ? 
O11 C114 1.64(4) . ? 
O12 C114 1.27(4) . ? 
O12 O12 1.38(6) 2_656 ? 
O12 C113 1.73(4) . ? 
O13 C115 1.22(4) . ? 
O13 C113 1.44(4) . ? 
O13 C116 1.53(5) . ? 
O13 C117 1.66(5) . ? 
O13 C112 1.93(4) . ? 
C105 C106 1.31(2) . ? 
C105 C108 1.37(3) . ? 
C105 C109 1.59(3) . ? 
C106 C109 1.33(3) . ? 
C108 C109 1.36(3) . ? 
C110 C110 1.32(7) 2_656 ? 
C111 C112 1.55(3) . ? 
C113 C114 1.32(3) . ? 
C115 C116 1.34(5) . ? 
C115 C117 1.66(6) . ? 
C116 C117 1.19(6) . ? 
 
loop_ 
 _geom_angle_atom_site_label_1 
 _geom_angle_atom_site_label_2 
 _geom_angle_atom_site_label_3 
 _geom_angle 
 _geom_angle_site_symmetry_1 
 _geom_angle_site_symmetry_3 
 _geom_angle_publ_flag 
C27 N1 C1 120.7(3) . . ? 
C27 N1 C14 119.8(3) . . ? 
C1 N1 C14 115.0(3) . . ? 
C53 N2 C66 120.3(3) . . ? 
C53 N2 C40 116.3(3) . . ? 
C66 N2 C40 120.6(3) . . ? 
C81 N3 C83 109.5(4) . . ? 
C81 N3 C79 109.9(4) . . ? 
C83 N3 C79 110.6(4) . . ? 
C89 N4 C85 111.1(3) . . ? 
C89 N4 C87 111.7(3) . . ? 
C85 N4 C87 109.8(3) . . ? 
C13 N5 C80 117.9(5) . . ? 
C52 N6 C82 116.0(4) . . ? 
C78 N7 C90 117.0(4) . 2_556 ? 
C26 N8 C86 116.3(3) . . ? 
C65 N9 C88 116.4(3) . . ? 
C39 N10 C84 115.8(8) . 2_556 ? 
C6 C1 C2 118.3(3) . . ? 
C6 C1 N1 122.2(3) . . ? 
C2 C1 N1 119.4(3) . . ? 
C1 C2 C3 121.0(3) . . ? 
C2 C3 C4 121.3(3) . . ? 
C5 C4 C3 115.7(3) . . ? 
C5 C4 C7 121.5(3) . . ? 
C3 C4 C7 122.6(3) . . ? 
C6 C5 C4 123.1(3) . . ? 
C1 C6 C5 120.5(3) . . ? 
C8 C7 C12 116.8(3) . . ? 
C8 C7 C4 122.9(3) . . ? 
C12 C7 C4 120.3(3) . . ? 
C9 C8 C7 121.1(3) . . ? 
C8 C9 C10 121.5(3) . . ? 
C9 C10 C11 117.7(4) . . ? 
C9 C10 C13 120.7(4) . . ? 
C11 C10 C13 121.6(4) . . ? 
C12 C11 C10 120.6(4) . . ? 
C11 C12 C7 122.0(4) . . ? 
N5 C13 C10 123.0(4) . . ? 
C15 C14 C19 119.2(3) . . ? 
C15 C14 N1 121.2(3) . . ? 
C19 C14 N1 119.6(3) . . ? 
C16 C15 C14 120.4(3) . . ? 
C15 C16 C17 121.3(3) . . ? 
C18 C17 C16 117.4(3) . . ? 
C18 C17 C20 121.0(3) . . ? 
C16 C17 C20 121.6(3) . . ? 
C19 C18 C17 121.5(3) . . ? 
C14 C19 C18 120.2(3) . . ? 
C21 C20 C25 117.9(3) . . ? 
C21 C20 C17 122.1(3) . . ? 
C25 C20 C17 120.0(3) . . ? 
C20 C21 C22 121.3(3) . . ? 
C21 C22 C23 120.1(3) . . ? 
C24 C23 C22 118.6(3) . . ? 
C24 C23 C26 118.1(3) . . ? 
C22 C23 C26 123.3(3) . . ? 
C23 C24 C25 121.4(3) . . ? 
C24 C25 C20 120.8(3) . . ? 
N8 C26 C23 124.3(4) . . ? 
C32 C27 C28 117.3(3) . . ? 
C32 C27 N1 122.8(3) . . ? 
C28 C27 N1 119.9(3) . . ? 
C29 C28 C27 120.8(3) . . ? 
C28 C29 C30 122.1(3) . . ? 
C29 C30 C31 117.3(3) . . ? 
C29 C30 C33 121.2(3) . . ? 
C31 C30 C33 121.5(3) . . ? 
C30 C31 C32 121.5(3) . . ? 
C31 C32 C27 120.9(3) . . ? 
C34 C33 C38 118.6(4) . . ? 
C34 C33 C30 119.5(4) . . ? 
C38 C33 C30 121.9(4) . . ? 
C33 C34 C35 119.5(5) . . ? 
C36 C35 C34 122.4(5) . . ? 
C35 C36 C37 118.5(5) . . ? 
C35 C36 C39 118.8(7) . . ? 
C37 C36 C39 122.6(7) . . ? 
C36 C37 C38 120.2(6) . . ? 
C37 C38 C33 120.7(5) . . ? 
N10 C39 C36 125.1(8) . . ? 
C41B C40 C45A 96.8(6) . . ? 
C41B C40 N2 126.2(5) . . ? 
C45A C40 N2 123.8(4) . . ? 
C41B C40 C41A 45.5(5) . . ? 
C45A C40 C41A 119.0(4) . . ? 
N2 C40 C41A 117.0(4) . . ? 
C41B C40 C45B 116.1(7) . . ? 
C45A C40 C45B 27.8(4) . . ? 
N2 C40 C45B 115.6(5) . . ? 
C41A C40 C45B 117.3(5) . . ? 
C42A C41A C40 117.8(5) . . ? 
C40 C41B C42B 123.7(9) . . ? 
C41A C42A C43 119.1(5) . . ? 
C43 C42B C41B 124.5(9) . . ? 
C42B C43 C44A 96.1(6) . . ? 
C42B C43 C46 127.1(5) . . ? 
C44A C43 C46 124.8(4) . . ? 
C42B C43 C42A 44.3(5) . . ? 
C44A C43 C42A 116.7(4) . . ? 
C46 C43 C42A 118.3(4) . . ? 
C42B C43 C44B 115.2(7) . . ? 
C44A C43 C44B 29.6(4) . . ? 
C46 C43 C44B 116.5(6) . . ? 
C42A C43 C44B 113.8(5) . . ? 
C43 C44A C45A 124.1(5) . . ? 
C45B C44B C43 118.2(10) . . ? 
C40 C45A C44A 123.2(5) . . ? 
C44B C45B C40 116.7(10) . . ? 
C51 C46 C47 116.9(3) . . ? 
C51 C46 C43 120.5(3) . . ? 
C47 C46 C43 122.5(3) . . ? 
C48 C47 C46 121.4(3) . . ? 
C49 C48 C47 120.9(3) . . ? 
C50 C49 C48 117.9(3) . . ? 
C50 C49 C52 118.0(3) . . ? 
C48 C49 C52 124.1(3) . . ? 
C51 C50 C49 121.4(4) . . ? 
C50 C51 C46 121.5(4) . . ? 
N6 C52 C49 124.0(4) . . ? 
C54 C53 C58 118.6(3) . . ? 
C54 C53 N2 119.8(3) . . ? 
C58 C53 N2 121.5(3) . . ? 
C55 C54 C53 120.9(3) . . ? 
C54 C55 C56 121.3(3) . . ? 
C57 C56 C55 116.5(3) . . ? 
C57 C56 C59 121.1(3) . . ? 
C55 C56 C59 122.4(3) . . ? 
C58 C57 C56 122.6(3) . . ? 
C57 C58 C53 120.0(3) . . ? 
C60 C59 C64 117.4(4) . . ? 
C60 C59 C56 121.2(3) . . ? 
C64 C59 C56 121.2(3) . . ? 
C61 C60 C59 121.2(3) . . ? 
C60 C61 C62 121.4(4) . . ? 
C61 C62 C63 118.2(4) . . ? 
C61 C62 C65 118.9(3) . . ? 
C63 C62 C65 122.9(3) . . ? 
C64 C63 C62 120.4(3) . . ? 
C63 C64 C59 121.2(4) . . ? 
N9 C65 C62 123.9(4) . . ? 
C71 C66 C67 118.5(3) . . ? 
C71 C66 N2 122.0(3) . . ? 
C67 C66 N2 119.5(3) . . ? 
C68 C67 C66 121.1(3) . . ? 
C67 C68 C69 121.5(3) . . ? 
C70 C69 C68 116.9(3) . . ? 
C70 C69 C72 121.4(3) . . ? 
C68 C69 C72 121.6(3) . . ? 
C69 C70 C71 121.7(3) . . ? 
C66 C71 C70 120.3(3) . . ? 
C77 C72 C73 117.6(3) . . ? 
C77 C72 C69 121.2(3) . . ? 
C73 C72 C69 121.1(3) . . ? 
C74 C73 C72 121.0(4) . . ? 
C75 C74 C73 120.9(4) . . ? 
C74 C75 C76 119.1(3) . . ? 
C74 C75 C78 118.7(4) . . ? 
C76 C75 C78 122.2(4) . . ? 
C77 C76 C75 119.7(4) . . ? 
C72 C77 C76 121.6(4) . . ? 
N7 C78 C75 122.3(4) . . ? 
N3 C79 C80 113.0(4) . . ? 
N5 C80 C79 113.2(6) . . ? 
N3 C81 C82 113.1(3) . . ? 
N6 C82 C81 111.2(4) . . ? 
N3 C83 C84 115.0(5) . . ? 
N10 C84 C83 109.4(5) 2_556 . ? 
N4 C85 C86 114.0(3) . . ? 
N8 C86 C85 110.9(3) . . ? 
N4 C87 C88 113.3(3) . . ? 
N9 C88 C87 111.5(3) . . ? 
N4 C89 C90 112.8(4) . . ? 
N7 C90 C89 112.3(4) 2_556 . ? 
C102 O2 C103 115.7(6) . . ? 
O1 C101 C102 100.8(7) . . ? 
O2 C102 C101 107.6(6) . . ? 
C104 C103 O2 107.2(8) . . ? 
O3 C104 C103 110.4(10) . . ? 
C107 O5 C110 121(3) . . ? 
C107 O5 C108 103(2) . . ? 
C110 O5 C108 101(2) . . ? 
C116 O6 C117 55(3) . . ? 
C116 O6 C106 133(4) . . ? 
C117 O6 C106 121(3) . . ? 
C116 O6 O9 153(5) . . ? 
C117 O6 O9 106(4) . . ? 
C106 O6 O9 36(2) . . ? 
C116 O6 O8 91(4) . . ? 
C117 O6 O8 122(3) . . ? 
C106 O6 O8 49.2(16) . . ? 
O9 O6 O8 85(3) . . ? 
C116 O6 C115 54(3) . . ? 
C117 O6 C115 67(3) . . ? 
C106 O6 C115 171(3) . . ? 
O9 O6 C115 141(4) . . ? 
O8 O6 C115 132(3) . . ? 
C116 O6 C109 97(3) . . ? 
C117 O6 C109 81(3) . . ? 
C106 O6 C109 44.0(13) . . ? 
O9 O6 C109 59(3) . . ? 
O8 O6 C109 55.8(16) . . ? 
C115 O6 C109 145(3) . . ? 
O9 O7 C106 38(3) . . ? 
C106 O8 C105 55.0(13) . . ? 
C106 O8 O6 58.3(19) . . ? 
C105 O8 O6 112(2) . . ? 
C106 O8 C109 51.3(14) . . ? 
C105 O8 C109 59.5(14) . . ? 
O6 O8 C109 70.7(19) . . ? 
C106 O9 O7 80(5) . . ? 
C106 O9 O6 67(4) . . ? 
O7 O9 O6 91(4) . . ? 
C106 O9 C109 49(3) . . ? 
O7 O9 C109 129(5) . . ? 
O6 O9 C109 71(3) . . ? 
O13 O11 C113 85(4) . . ? 
O13 O11 C112 92(3) . . ? 
C113 O11 C112 151(4) . . ? 
O13 O11 C114 112(4) . . ? 
C113 O11 C114 53(2) . . ? 
C112 O11 C114 150(3) . . ? 
C114 O12 O12 122(3) . 2_656 ? 
C114 O12 C113 49.5(18) . . ? 
O12 O12 C113 168(4) 2_656 . ? 
O11 O13 C115 159(5) . . ? 
O11 O13 C113 51(3) . . ? 
C115 O13 C113 143(4) . . ? 
O11 O13 C116 117(4) . . ? 
C115 O13 C116 57(3) . . ? 
C113 O13 C116 96(3) . . ? 
O11 O13 C117 93(3) . . ? 
C115 O13 C117 68(3) . . ? 
C113 O13 C117 110(3) . . ? 
C116 O13 C117 44(2) . . ? 
O11 O13 C112 57(3) . . ? 
C115 O13 C112 114(3) . . ? 
C113 O13 C112 103(2) . . ? 
C116 O13 C112 141(3) . . ? 
C117 O13 C112 97(2) . . ? 
C106 C105 C108 106.9(19) . . ? 
C106 C105 O8 53.5(13) . . ? 
C108 C105 O8 103(2) . . ? 
C106 C105 C109 53.4(13) . . ? 
C108 C105 C109 54.2(14) . . ? 
O8 C105 C109 65.1(15) . . ? 
O9 C106 O8 149(5) . . ? 
O9 C106 C105 138(5) . . ? 
O8 C106 C105 71.5(16) . . ? 
O9 C106 C109 99(4) . . ? 
O8 C106 C109 79.5(17) . . ? 
C105 C106 C109 74.0(16) . . ? 
O9 C106 O6 76(4) . . ? 
O8 C106 O6 73(2) . . ? 
C105 C106 O6 142(2) . . ? 
C109 C106 O6 87(2) . . ? 
O9 C106 O7 63(4) . . ? 
O8 C106 O7 116.0(19) . . ? 
C105 C106 O7 119.4(17) . . ? 
C109 C106 O7 161(2) . . ? 
O6 C106 O7 88(2) . . ? 
C109 C108 C105 71.2(19) . . ? 
C109 C108 O5 137(3) . . ? 
C105 C108 O5 150(3) . . ? 
C106 C109 C108 107(2) . . ? 
C106 C109 C105 52.6(13) . . ? 
C108 C109 C105 54.7(15) . . ? 
C106 C109 O8 49.2(13) . . ? 
C108 C109 O8 95(2) . . ? 
C105 C109 O8 55.4(13) . . ? 
C106 C109 O9 32(2) . . ? 
C108 C109 O9 124(3) . . ? 
C105 C109 O9 78(2) . . ? 
O8 C109 O9 78(3) . . ? 
C106 C109 O6 49.3(16) . . ? 
C108 C109 O6 148(2) . . ? 
C105 C109 O6 96.1(19) . . ? 
O8 C109 O6 53.5(15) . . ? 
O9 C109 O6 49(2) . . ? 
C110 C110 O5 121(4) 2_656 . ? 
C112 C111 O10 116(2) . . ? 
C111 C112 O11 116(2) . . ? 
C111 C112 O13 145(2) . . ? 
O11 C112 O13 30.9(13) . . ? 
O11 C113 C114 84(3) . . ? 
O11 C113 O13 43(2) . . ? 
C114 C113 O13 106(3) . . ? 
O11 C113 O12 123(3) . . ? 
C114 C113 O12 46.9(17) . . ? 
O13 C113 O12 153(3) . . ? 
O12 C114 C113 84(2) . . ? 
O12 C114 O11 120(3) . . ? 
C113 C114 O11 43.0(18) . . ? 
O13 C115 C116 74(4) . . ? 
O13 C115 O6 113(4) . . ? 
C116 C115 O6 47(3) . . ? 
O13 C115 C117 68(3) . . ? 
C116 C115 C117 45(3) . . ? 
O6 C115 C117 49(2) . . ? 
C117 C116 O6 70(4) . . ? 
C117 C116 C115 82(4) . . ? 
O6 C116 C115 79(4) . . ? 
C117 C116 O13 74(4) . . ? 
O6 C116 O13 120(4) . . ? 
C115 C116 O13 50(3) . . ? 
C116 C117 O6 56(3) . . ? 
C116 C117 C115 53(3) . . ? 
O6 C117 C115 64(3) . . ? 
C116 C117 O13 63(3) . . ? 
O6 C117 O13 103(4) . . ? 
C115 C117 O13 43(2) . . ? 
 
_diffrn_measured_fraction_theta_max    1.000 
_diffrn_reflns_theta_full              25.03 
_diffrn_measured_fraction_theta_full   1.000 
_refine_diff_density_max    0.525 
_refine_diff_density_min   -0.407 
_refine_diff_density_rms    0.068 

#===END
